# Supplementary material
Source: publisher figshare collection journal article supplement (https://acs.figshare.com/ndownloader/files/20405874)
Supplement: Supplementary file 1 [file 20405874]

**Organocatalytic Access to a  
cis-Cyclopentyl- $\gamma$ -amino Acid: An Intriguing  
Model of Selectivity and Formation of a Stable  
10/12-Helix from the Corresponding  
 $\gamma/\alpha$ -Peptide.**

Rossana Fanelli,<sup>†</sup> Dénes Berta,<sup>†</sup> Tamás Földes,<sup>†</sup> Edina Rosta,<sup>†</sup> Robert Andrew  
Atkinson,<sup>‡</sup> Hans-Jörg Hofmann,<sup>¶</sup> Kenneth Shankland,<sup>§</sup> and Alexander J. A.  
Cobb\*,<sup>†</sup>

<sup>†</sup>*Department of Chemistry, King's College London, 7 Trinity Street, London SE1 1DB, UK*

<sup>‡</sup>*Randall Division of Cell and Molecular Biophysics, and the BHF Centre of Research  
Excellence, Centre for Biomolecular Spectroscopy, King's College London, London, UK*

<sup>¶</sup>*Institut für Biochemie, Universität Leipzig, Brüderstrasse 34, 04103 Leipzig, Germany*

<sup>§</sup>*School of Chemistry, Food and Pharmacy, University of Reading, Whiteknights, Reading  
RG6 6AD, UK*

E-mail: andre.cobb@kcl.ac.uk

# Optimisation of the 5-*exo-trig* cyclization for the final synthesis of the *cis*-nitroalcohol **11**

## Preliminary optimisation for the synthesis of the *trans*- $\gamma$ -amino acid precursor **15**.

The investigation was carried out at room temperature without any further reduction as a provisional study. This method led to the synthesis of the diastereomer *trans*-**15** as main product of the reaction.

Several amino based catalysts were tested (Figure S1).

Diastereoselectivity and enantioselectivity were not reported where yields were considerably low and the obtained results were not significant for the optimisation of the reaction. Bifunctional catalysts **XII**, **XIII** and **XIV** were synthesised according to literature procedures.<sup>1,2</sup> A preliminary catalytic screen was performed with the reaction catalysed by the Hayashi-Jørgensen catalyst **III** reaching completion in 20 minutes, in 62% yield, with a 1:4 *cis/trans* diastereoselectivity and a –59% *ee* of the major diastereomer.

The same reaction was performed in the presence of an acid co-catalyst (3-nitro benzoic acid) at rt and at 0 °C. In both cases, yields, diastereoselectivity and enantioselectivity improved to 94% and 98% yield with a 1:9 and 1:13 *dr* and –62% and –71% *ee* respectively (Entry 2 and 3, Table S1). The yield was improved further with the use of bifunctional catalyst **VI** and this is probably due to a lower amount of impurities forming (Table S1). As with catalyst **III**, repeating the reaction at 0 °C with tetrazole catalyst **VI** the *dr* improved to 1:7, which suggests that at lower temperature the diastereomer *cis* is more likely to be isolated. Several other secondary amine catalysts and bifunctional catalysts were tested (Table S1), however all with limited success in terms of *ee* and *dr*. Interestingly, Hayashi-Jørgensen-CF<sub>3</sub> catalyst **VIII** produced a 1:2 *dr* in favour of the *trans* product with mismatched enantioselectivity between the *cis* and *trans* diastereomers. Primary amine catalyst **IX** was screened

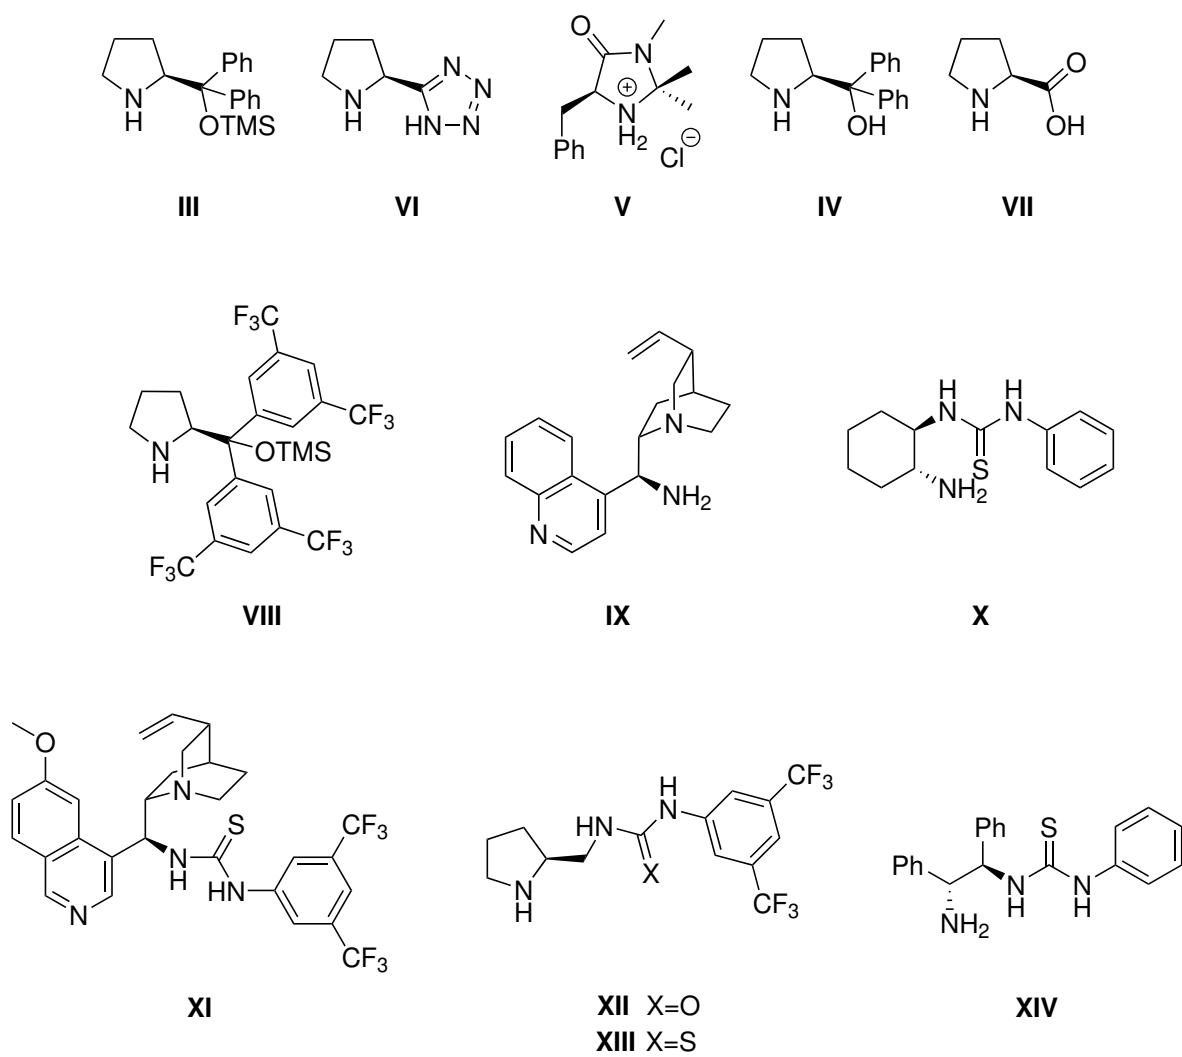

Figure S1: Selected catalysts to perform a preliminary screen at rt.

Table S1: Preliminary catalyst screen.

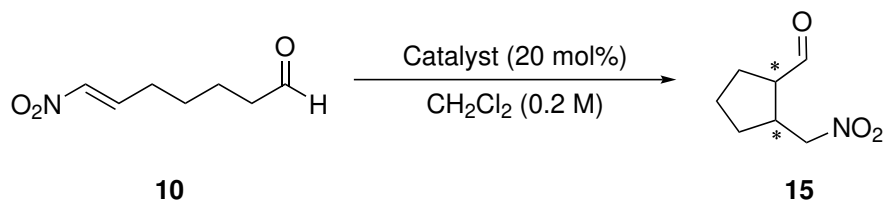

| Entry | Cat.                     | Time [h] | T [°C] | Yield <sup>i</sup> [%] | $dr^{ii}$<br>( <i>cis/trans</i> ) | $ee^{iii}$ [%]<br>( <i>trans</i> ) |
|-------|--------------------------|----------|--------|------------------------|-----------------------------------|------------------------------------|
| 1     | <b>III</b>               | 0.3      | rt     | 62                     | 1:4                               | -59                                |
| 2     | <b>III</b> <sup>iv</sup> | 0.5      | rt     | 94                     | 1:9                               | -62                                |
| 3     | <b>III</b> <sup>iv</sup> | 0.5      | 0      | 98                     | 1:13                              | -71                                |
| 4     | <b>VI</b>                | 1.5      | rt     | 91                     | 1:8                               | 72                                 |
| 5     | <b>VI</b>                | 9.5      | 0      | 74                     | 1:7                               | 79                                 |
| 6     | <b>IV</b>                | 2.5      | rt     | 67                     | 1:2                               | 6                                  |
| 7     | <b>VII</b>               | 0.7      | rt     | 67                     | 1:9                               | -7                                 |
| 8     | <b>VIII</b>              | 120      | rt     | 67                     | 1:2                               | 15 <sup>v</sup>                    |
| 9     | <b>V</b>                 | 2.5      | rt     | 54                     | 1:7                               | -59                                |
| 10    | <b>XI</b>                | 72       | rt     | 26                     | 1:1                               | ND                                 |
| 11    | <b>IX</b> <sup>vi</sup>  | 144      | rt     | 11                     | 1:2                               | -22                                |
| 12    | <b>X</b>                 | 18       | rt     | 51                     | 1:5                               | 85                                 |
| 13    | <b>XII</b>               | 16       | rt     | 50                     | 1:3                               | 63                                 |
| 14    | <b>XIII</b>              | 19       | rt     | 70                     | 1:3                               | 61                                 |
| 15    | <b>XIV</b>               | 96       | rt     | 41 <sup>vii</sup>      | 1:6                               | 88                                 |

(i) Combinatorial isolated yield of separable diastereomers. (ii) Determined by crude <sup>1</sup>H NMR. (iii) Determined by HPLC analysis on a chiral stationary phase. (iv) In the presence of 3-nitrobenzoic acid (10 mol%) as co-catalyst. (v) -70% *ee* for diastereomer *cis*. (vi) In the presence of benzoic acid (10 mol%) as co-catalyst. (vii) Yield of single diastereomer *trans*.

alongside benzoic acid as co-catalyst to aid the enamine formation and hydrolysis as reported in literature (Table S1).<sup>3</sup> However, the reaction presented 1:2 *dr* and –22% *ee* of *trans*-**15** and only 11% yield after 6 days, which is probably due to the slow rate of hydrolysis of the iminium intermediate impeding the catalytic cycle to complete (Entry 11, Table S1). Catalysts **XII** and **XIII** gave moderate to good yields, moderate enantioselectivities (entry 13 and 14, Table S1) and 1:3 *dr*. The inclusion of a primary amine and thiourea moiety within the same catalyst (**X** and **XIV**) led to high enantioselectivity (entries 13 and 16, Table S1). The reaction catalysed by **XIV** achieved the best results from the catalyst screen and was used for further optimisation studies.

Mild and strong acids were tested as additives to the reaction, however all led to a reduction in diastereoselectivity and enantioselectivity (Table S2). A different strategy was

Table S2: Co-catalyst screen for the synthesis of the 5-membered ring *trans*-**15**.

| Entry | Co-cat.<br>(20 mol%)                        | Time [d] | Yield <sup>i</sup> [%] | <i>dr</i> <sup>ii</sup><br>( <i>cis</i> / <i>trans</i> ) | <i>ee</i> <sup>iii</sup><br>( <i>trans</i> )[%] |
|-------|---------------------------------------------|----------|------------------------|----------------------------------------------------------|-------------------------------------------------|
| 1     | -                                           | 96       | 41 <sup>iv</sup>       | 1:6                                                      | 88                                              |
| 2     | Benzoic acid <sup>v</sup>                   | 7        | 47 <sup>vi</sup>       | 1:4                                                      | 57                                              |
| 3     | 4-NBA                                       | 7        | 42                     | 1:3                                                      | 39                                              |
| 4     | <i>p</i> -Toluene-sulfonic acid monohydrate | 7        | 15                     | 1:1                                                      | -                                               |
| 5     | <i>o</i> -Fluoro benzoic acid               | 5        | 43 <sup>vi</sup>       | 1:2                                                      | 45                                              |
| 6     | TFA                                         | 7        | 23 <sup>vii</sup>      | 1:1.5                                                    | 40                                              |
| 7     | 3-NBA                                       | 6        | 44                     | 1:1.5                                                    | 37                                              |

(i) Combinatorial isolated yield of separable diastereomers. (ii) Determined by crude <sup>1</sup>H NMR. (iii) Determined by HPLC analysis on a chiral stationary phase. (iv) Yield of single diastereomer *trans*. (v) Co-catalyst loading of 10 mol%. (vi) Yield of single diastereomer *trans* because product *cis* was obtained together with not easily separable impurities. (vii) The reaction did not go to completion.

therefore outlined to optimise the enantioselective synthesis of the 5-membered ring **15**. This initial study was valuable to deepen our understanding of the targeted reaction and to select the best catalysts for further investigations. The enantioselectivity of *cis*-**15** was not recorded during this first preliminary study apart from entry 9 of Table S1 because it was obtained as minor diastereomer (*cis*-**15**) with poor yields. Having focused on the synthesis of the *trans* diastereomer in the first part of the study, the project moved on to target the synthesis of the *cis* diastereomer.

## Asymmetric synthesis of *cis*- $\gamma$ -amino acid precursor **11**.

The study of the 5-*exo-trig* cyclisation at rt led to the identification of the best catalysts for further optimisation of the *cis*-nitroalcohol **11** synthesis. Five catalysts out of the catalyst screen performed at rt were selected to test at lower temperature followed by an *in situ* reduction in order to isolate *cis*-**11** (Table S3). The reactions were carried out at 0 °C except from the reaction catalysed by **XIV**, which was performed at rt due to slow reactivity (Table S3). Catalyst **XIV** gave the highest *ee* for *cis*-**11** albeit with a long reaction time, low yield and *dr*. Catalyst **III** and **VI** produced the best results in terms of yields, diastereoselectivity and enantioselectivity and therefore were selected for further investigation.

Table S3: Catalyst screen at 0 °C.

| 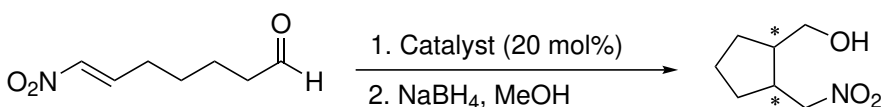 |                          |          |                        |                                                 |                                                      |
|------------------------------------------------------------------------------------|--------------------------|----------|------------------------|-------------------------------------------------|------------------------------------------------------|
| <b>10</b>                                                                          |                          |          | <b>11</b>              |                                                 |                                                      |
| Entry                                                                              | Catalyst                 | Time [h] | Yield <sup>i</sup> [%] | <i>dr</i> <sup>ii</sup><br>( <i>cis/trans</i> ) | <i>ee</i> <sup>iii</sup> [%]<br>( <i>cis,trans</i> ) |
| 1                                                                                  | <b>III</b>               | 1        | 57                     | 1:1                                             | 87 <sup>iv</sup> , -27                               |
| 2                                                                                  | <b>VI</b>                | 14       | 62                     | 2:1                                             | -83 <sup>iv</sup> , 71                               |
| 3                                                                                  | <b>IV</b>                | 96       | 5 <sup>v</sup>         | 1:1                                             | ND, ND                                               |
| 4                                                                                  | <b>V</b>                 | 72       | 42                     | 1:6                                             | -68, -74                                             |
| 5                                                                                  | <b>XIV</b> <sup>vi</sup> | 104      | 6                      | 1:1.5                                           | -95, ND                                              |

(i) Combinatorial isolated yield of separable diastereomers. (ii) Determined by crude <sup>1</sup>H NMR. (iii) Determined by HPLC analysis on a chiral stationary phase. (iv) Determined by AD-H HPLC chiral column. (v) The reaction did not go to completion. (vi) The reaction was carried out at rt.

Temperature control of the reaction was unsurprisingly an important aspect of diastereoselectivity. Temperature plays an important role as *cis*-**11** is the kinetic product and can only be isolated at low temperature after *in situ* reduction to the corresponding alcohol, since the diastereomer *cis* tends to convert to the more stable thermodynamic product *trans* in the presence of the secondary amine catalyst. The organocatalytic reaction was tested at 0, -10 and -20 °C with catalysts **III** and **VI** (Table S4). The use of tetrazole catalyst **VI** at -20 °C achieved the highest *dr*, a solvent screen was therefore performed with this catalyst.

Table S4: Temperature screen for the optimisation of the 5-*exo-trig* cyclisation.

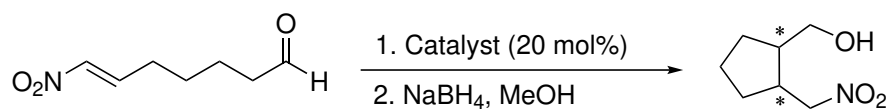

| <b>10</b> |            |        |       | <b>11</b>              |                                                 |                                                      |
|-----------|------------|--------|-------|------------------------|-------------------------------------------------|------------------------------------------------------|
| Entry     | Catalyst   | T [°C] | t [h] | Yield <sup>i</sup> [%] | <i>dr</i> <sup>ii</sup><br>( <i>cis/trans</i> ) | <i>ee</i> <sup>iii</sup> [%]<br>( <i>cis,trans</i> ) |
| 1         | <b>III</b> | -20    | 5     | 20 <sup>iv</sup>       | 1:1                                             | 36, 53                                               |
| 2         | <b>III</b> | -10    | 3     | 64                     | 1:1                                             | -86, -26                                             |
| 3         | <b>VI</b>  | -20    | 22    | 62                     | 3:1                                             | 82, 22                                               |
| 4         | <b>VI</b>  | -10    | 22    | 68                     | 1:1                                             | 83, 67                                               |

(i) Combinatorial isolated yield of separable diastereomers. (ii) Determined by crude <sup>1</sup>H NMR. (iii) Determined by HPLC analysis on a chiral stationary phase. (iv) The reaction did not go to completion.

The intramolecular Michael addition was tested with different solvents, but only chlorinated solvents led to good diastereoselectivity and excellent enantioselectivity (Table S5). Protic and polar solvents such as methanol and THF (entry 4 and 6, Table S5) were found to have a detrimental effect on yield and enantioselectivity of the reaction and this can be associated to the coordination of the solvent to the tetrazole moiety interfering with the protonation step which might be crucial for the reactivity and the selectivity of the reaction. Interestingly, performing the reaction in dichloroethane gave the best results in terms of *dr* and *ee* (entry 7, Table S5).



Table S5: Solvent screen of the 5-*exo-trig* cyclisation.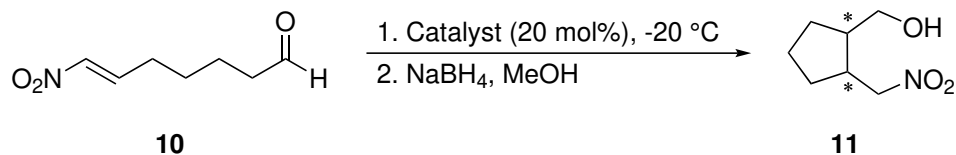

| Entry | Solvent (0.2 M)                 | t [h] | Yield <sup>i</sup> [%] | <i>dr</i> <sup>ii</sup> ( <i>cis/trans</i> ) | <i>ee</i> <sup>iii</sup> ( <i>cis,trans</i> ) [%] |
|-------|---------------------------------|-------|------------------------|----------------------------------------------|---------------------------------------------------|
| 1     | CH <sub>2</sub> Cl <sub>2</sub> | 22    | 62                     | 3:1                                          | 82, 22                                            |
| 2     | Toluene                         | 24    | 57                     | 3:1                                          | 70, 32                                            |
| 3     | CH <sub>3</sub> CN              | 25    | 54                     | 1:1                                          | 65, 56                                            |
| 4     | THF                             | 24    | 52                     | 1:1                                          | 50, 38                                            |
| 5     | CHCl <sub>3</sub>               | 20    | 68                     | 3:1                                          | 79, 48                                            |
| 6     | MeOH                            | 26    | 11                     | 1.5:1                                        | -10, ND                                           |
| 7     | DCE                             | 50    | 53                     | 7:1                                          | 85, 54                                            |

(i) Combinatorial isolated yield of separable diastereomers. (ii) Determined by crude <sup>1</sup>H NMR. (iii) Determined by HPLC analysis on a chiral stationary phase.

The solvent screen was then followed by another co-catalyst screen. In the presence of an acidic co-catalyst, such as entry 1 and entry 2 of Table S6, the diastereoselectivity shifted towards the synthesis of *trans*-**11** as the main diastereomer. Basic co-catalysts on the other hand favoured the production of *cis*-**11** albeit in low yields (Table S6). This type of co-catalyst might promote the formation of side products, reducing the efficiency of the reaction. The next step for the optimisation of the 5-*exo-trig* intramolecular Michael addition was the concentration screen. As expected, yield improved considerably from 58% to 78% when diluting the reaction from 0.2M to 0.05M and this is possibly due to the suppression of side reactions, like nitroolefin polymerisation, which might occur at higher concentrations.<sup>4,5</sup>

Table S6: Co-catalyst screen of 5-*exo-trig* cyclisation for the synthesis of *cis*-**11**.

1. (20 mol%), co-cat.  
DCE (0.2M), -20 °C  
2. NaBH<sub>4</sub>, MeOH

|       | <b>10</b>                |          |                        |                                                 | <b>11</b>                                            |
|-------|--------------------------|----------|------------------------|-------------------------------------------------|------------------------------------------------------|
| Entry | Co-catalyst<br>(20 mol%) | Time [h] | Yield <sup>i</sup> [%] | <i>dr</i> <sup>ii</sup><br>( <i>cis/trans</i> ) | <i>ee</i> <sup>iii</sup> [%]<br>( <i>cis,trans</i> ) |
| 1     | Benzoic acid             | 48       | 53                     | 1:2                                             | 78, 80                                               |
| 2     | 3-NBA                    | 48       | 68                     | 1:5                                             | 70, 82                                               |
| 3     | Acetic acid              | 77       | 54                     | 2:1                                             | 86, 62                                               |
| 4     | Catechol                 | 48       | 47                     | N.A. <sup>v</sup>                               | 74, 41                                               |
| 5     | TEA                      | 20       | 25                     | 4:1                                             | -26, ND                                              |
| 6     | Dimethyl-<br>piperazine  | 48       | 18                     | 2.5:1                                           | 7, 5                                                 |

(i) Combinatorial isolated yield of separable diastereomers. (ii) Determined by crude <sup>1</sup>H NMR. (iii) Determined by HPLC analysis on a chiral stationary phase. (iv) The reaction did not go to completion. (v) The *dr* cannot be calculated *via* NMR.

Table S7: Concentration screen of the 5-*exo-trig* cyclisation.

| Entry           | Conc. [M]         | Time [h] | Yield <sup>i</sup> [%] | <i>dr</i> <sup>ii</sup><br>( <i>cis/trans</i> ) | <i>ee</i> <sup>iii</sup> [%]<br>( <i>cis,trans</i> ) |
|-----------------|-------------------|----------|------------------------|-------------------------------------------------|------------------------------------------------------|
| 1               | 0.2 <sup>iv</sup> | 42       | 58                     | 6:1                                             | 83, -                                                |
| 2               | 0.05              | 168      | 74                     | 8.5:1                                           | 93, -                                                |
| 3               | 0.1               | 48       | 66                     | 6:1                                             | 89, -                                                |
| 4               | 0.2               | 50       | 60                     | 5.5:1                                           | 88, -                                                |
| 5 <sup>v</sup>  | 0.1               | 72       | 60                     | 5.5:1                                           | 91, -                                                |
| 6 <sup>vi</sup> | 0.05              | 168      | 51                     | 4:1                                             | 85, 45                                               |

(i) Combinatorial isolated yield of separable diastereomers. (ii) Determined by crude <sup>1</sup>H NMR. (iii) Determined by HPLC analysis on a chiral stationary phase. (iv) The reaction was carried out with anhydrous solvents. (v) The reaction was reduced with DIBAL-H. (vi) Cold addition of a solution of substrate (2M in DCE) to the reaction mixture.

A catalyst loading screen was performed to complete the reaction optimisation and it was found that the reaction maintains comparable results when using catalyst loading as low as 5 mol% (Table S8). Low catalyst loading is an important achievement for organocatalysis and it is likely that the reaction catalysed by 2 mol% catalyst would give higher yield if the reaction was carried out in larger scale due to encountered solubility issues (entry 5, Table S8).

Table S8: Catalyst loading screen for the optimisation of the 5-*exo-trig* cyclisation.

| Entry    | Conc. [M]   | Catalyst loading [mol%] | Time [h]   | Yield <sup>i</sup> [%] | <i>dr</i> <sup>ii</sup> ( <i>cis/trans</i> ) | <i>ee</i> <sup>iii</sup> [%] ( <i>cis,trans</i> ) |
|----------|-------------|-------------------------|------------|------------------------|----------------------------------------------|---------------------------------------------------|
| 1        | 0.1         | 10                      | 70         | 64                     | 7:1                                          | 89, 26                                            |
| 2        | 0.1         | 5                       | 168        | 52                     | 11.5:1                                       | 88, 0                                             |
| 3        | 0.05        | 10                      | 24         | 74                     | 9:1                                          | 92, 34                                            |
| <b>4</b> | <b>0.05</b> | <b>5</b>                | <b>168</b> | <b>75</b>              | <b>10:1</b>                                  | <b>89, -56</b>                                    |
| 5        | 0.05        | 2                       | 168        | 43                     | 10:1                                         | 92, -11                                           |

(i) Combinatorial isolated yield of separable diastereomers. (ii) Determined by crude <sup>1</sup>H NMR. (iii) Determined by HPLC analysis on a chiral stationary phase.

## Scale up of the reaction

The optimisation of the 5-*exo-trig* cyclisation assisted by the bifunctional tetrazole catalyst **VI** produced the desired *cis*-nitroalcohol **11** in high yield, good diastereoselectivity and excellent enantioselectivity. The reaction was then successfully scaled up to 7 mmol and it was stopped after 99 hours instead of 168 hours producing analogous results (Table S9). It is believed that the amount of starting material left in solution is not reacting as fast as in the first 4 days and this might be due to the high concentration of the competing product **15** formed that tends to condense again with the catalyst in order to convert to the more stable *trans*-**15**.

Table S9: Scale up of the 5-*exo-trig* cyclisation.

| 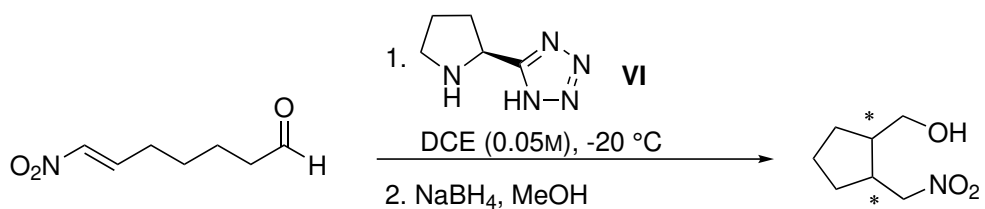 |                       |                         |           |                        |                                              |                                             |
|-------------------------------------------------------------------------------------|-----------------------|-------------------------|-----------|------------------------|----------------------------------------------|---------------------------------------------|
| <b>10</b>                                                                           |                       | <b>11</b>               |           |                        |                                              |                                             |
| Entry                                                                               | Reaction scale [mmol] | Catalyst loading [mol%] | Time [h]  | Yield <sup>i</sup> [%] | <i>dr</i> <sup>ii</sup> ( <i>cis/trans</i> ) | <i>ee</i> <sup>iii</sup> ( <i>cis</i> ) [%] |
| 1                                                                                   | 0.64                  | 20                      | 168       | 74                     | 8:1                                          | 93                                          |
| 2                                                                                   | 0.64                  | 5                       | 168       | 75                     | 10:1                                         | 89                                          |
| <b>3</b>                                                                            | <b>7.0</b>            | <b>5</b>                | <b>99</b> | <b>74</b>              | <b>9:1</b>                                   | <b>92</b>                                   |

(i) Combinatorial isolated yield of separable diastereomers. (ii) Determined by crude <sup>1</sup>H NMR. (iii) Determined by HPLC analysis on a chiral stationary phase.

## General

All reactions were carried out at room temperature and magnetically stirred unless otherwise stated. Anhydrous  $\text{CH}_2\text{Cl}_2$ , THF, MeOH, DMF and toluene solvents were obtained from a dry solvent system all other solvents were supplied as Sureseal® bottles by Sigma Aldrich. All reagents were supplied by Sigma Aldrich, Alfa-Aesar, Fisher and VWR unless otherwise stated.

**NMR data:** Nuclear Magnetic Resonance (NMR) spectra were recorded using a Bruker Ascend 400 (400 MHz) or a Bruker NEO 600 (600 MHz) spectrometer using TMS as internal standard. Chemical shifts ( $\delta$ ) are quoted in parts per million (ppm) using the abbreviations: s, singlet; d, doublet; dd, double of dublets; t, triplet; dt, doublet of triplets; ddt, doublet of doublet of triplets; td, triplet of doublets; q, quartet. Resonances that could not be easily interpreted were designated multiplets (m) or broad (br). Coupling constants  $J$  are quoted in Hz.  $^{13}\text{C}$  NMR spectra were recorded at 100 MHz on a Bruker Ascend 400 (400 MHz) or a Bruker NEO 600 (600 MHz) spectrometer. Two-dimensional spectroscopy (COSY, HSQC, HMBC, TOCSY, ROESY) was used to confirm the assignments where necessary. NMRs taken on the Bruker NEO 600 (600 MHz) were carried out at the NMR facility of the Centre for Biomolecular Spectroscopy at King's College London. Crosspeaks were integrated manually within Topspin 3.5. The average of the intensities of AMCP  $\text{H}\gamma_1$ - $\text{H}\gamma_2$  cross peaks was used as a reference,  $I_0$ , set to correspond to a distance,  $r_0$ , of 1.763 Å. All other upper limits for distance restraints were calculated using:  $r_1 = [(I_0/I_1)(r_0^6)]^{1/6}$ . Lower limits for all distance restraints were set to 1.8 Å.

**IR data:** IR spectra were recorded on a Shimadzu IRAffinity-1S FTIR Spectrophotometer as a thin film. The selected absorptions are quoted in wavenumbers ( $\text{cm}^{-1}$ ). MS data: High-resolution mass spectra were recorded on either Waters LCT Premier (Es-ToF), Thermo Scientific Q-Exactive (APCI) and Micromass Autospec Premier (EI) by Imperial College London, Department of Chemistry Mass Spectrometry Service. Optical Rotation: Optical rotation readings were recorded using an Anton Parr MCP100 Polarimeter. Specific

rotations ( $[\alpha]^{20}_D$ ) were recorded at the sodium D line (589 nm) in methanol or  $\text{CH}_2\text{Cl}_2$  and are quoted in:  $\text{deg cm}^2 \text{ g}^{-1}$ . Solution concentrations (c) are given in units of  $10^{-2} \text{ g mL}^{-1}$ . Temperatures are in degrees Celsius ( $^{\circ}\text{C}$ ). The prefixes (+) and (-) indicate the sign of the optical rotation. Correct units:  $\text{deg cm}^2 \text{ g}^{-1}$

**Melting point:** Melting points were determined on a Stuart SMP30 melting point apparatus and are uncorrected.

**HPLC Profiles:** HPLC analysis was determined on Agilent Technologies 1200 Series HPLC, using a ratio of HPLC grade hexanes and propan-1-ol as the eluent, using a Chiralpak AD-H, OD or AS column (0.46 cm x 25 cm) and detection by UV at 210 nm. Peaks were assigned spiking the enantioselective sample with the racemic.

**Chromatography:** Reactions were monitored by thin layer chromatography on silica gel precoated aluminium sheets (TLC Silica Gel 60 F254, Merck). Visualisation was accomplished by irradiation by UV light at 254 nm and/or ninhydrin stain, potassium permanganate stain, *p*-anisaldehyde, dinitrophenylhydrazine or vanilline. Column chromatography was performed on Merck silica gel (60 Å, 230 - 400 mesh, 40 - 63  $\mu\text{m}$ ) or on a CombiflashRF+ system.

**Single Crystal X-ray:** X-ray data was collected on an Oxford Gemini S-ultra diffractometer using K $\alpha$  ( $\lambda = 1.54180 \text{ Å}$ ) radiation.

**Circular Dichroism:** All CD spectra were measured in an Aviv Circular Dichroism Spectrophotometer, Model 410 (Biomedical Inc., Lakewood, NJ, USA), with specially adapted sample detection to eliminate scattering artefacts, or at the Karlsruhe synchrotron. A final oligomer concentration  $1.6 \text{ mg mL}^{-1}$  for **18**,  $1.2 \text{ mg mL}^{-1}$  for **20** and  $1.6 \text{ mg mL}^{-1}$  for **21** was used in quartz rectangular Suprasil demountable cells of pathlength 0.2 mm (Hellma or 0.5 mm Analytics). Each sample was scanned two to four times from 270 to 185 nm, at 1-nm intervals with an averaging time of 0.5 s. The same cell containing buffer only was also measured for background subtraction during data analysis. All CD spectra were processed using CDTool.<sup>6</sup> First, the multiple scans were averaged and the buffer background was sub-

tracted. These subtracted spectra were zeroed and smoothed, which set the baseline at zero between 255 and 270 nm.

# Synthesis of the *endo*-nitroolefin **10**

## Method A for the synthesis of **10**

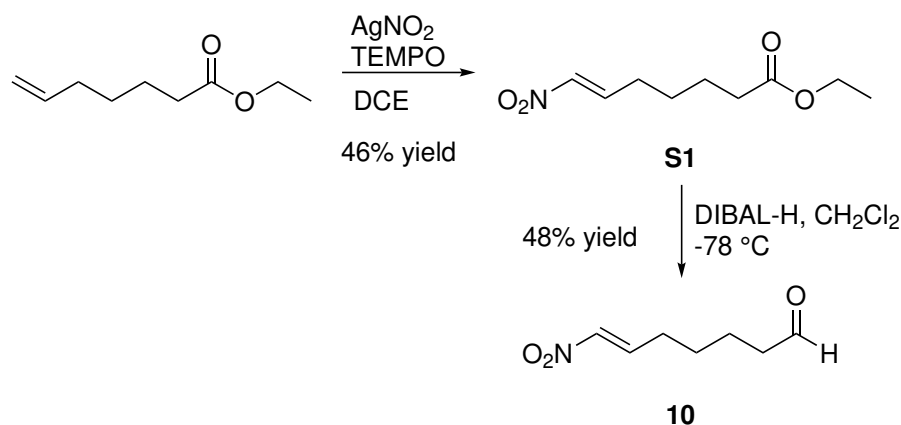

Figure S2: Synthesis of substrate **10** according to the synthetic procedure described in method A.

## Ethyl (*E*)-7-nitrohept-6-enoate **S1**

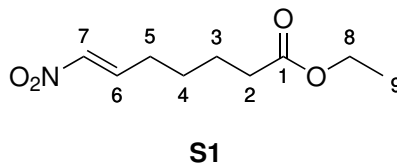

To an oven-dried quick-fit cap test tube charged with magnetic stir-bar was added activated 4Åmolecular sieves (1.5 g),  $\text{AgNO}_2$  (21.743g, 128 mmol) and TEMPO (2.0 g, 12.8 mmol). Ethyl-6-heptenoate (5.6 mL, 32.0 mmol) and anhydrous DCE (100 mL) were added. The tube was then placed in a preheated oil bath at  $70\text{ }^\circ\text{C}$  and the reaction mixture was left stirring vigorously for 18 hours. The progress of the reaction was monitored by TLC and then the reaction mixture was left to cool down to rt. The reaction mixture was then filtered through a short pad of celite washed with ethyl acetate (500 mL) and concentrated *in vacuum*. The crude product was then purified *via* combiflash using silica gel columns and a gradient solution of ethyl acetate and hexane up to 20% ethyl acetate in hexane to afford



the titled compound **S1** as a colourless oil (2.955 g, 14.7 mmol, 46%). IR (neat,  $\text{cm}^{-1}$ ) 2936, 1728, 1650, 1522, 1462, 1349, 1179, 1152, 1097, 1030;  $^1\text{H}$  NMR (400 MHz,  $\text{CDCl}_3$ )  $\delta$  7.37 – 7.21 (1H, m, H-7), 7.01 (1H, dt,  $J = 13.4, 1.6$  Hz, H-6), 4.15 (2H, q,  $J = 7.1$  Hz, H-8), 2.43 – 2.23 (4H, m, H-2 and H-5), 1.74 – 1.56 (2H, m, H-4), 1.64 – 1.50 (2H, m, H-3), 1.28 (3H, t,  $J = 7.1$  Hz, H-9).  $^{13}\text{C}$  NMR ( $\text{CDCl}_3$ , 101 MHz)  $\delta$  173.1 (C-1), 141.9 (C-6), 139.8 (C-7), 60.4 (C-8), 33.8 (C-2), 28.1 (C-5), 27.2 (C-3), 24.3 (C-4), 14.2 (C-9); HRMS required for  $\text{C}_9\text{H}_{14}\text{NO}_4$   $[\text{M}-\text{H}]^+$  is 200.0923, found 200.0931.

### (E)-7-nitrohept-6-enal **10**

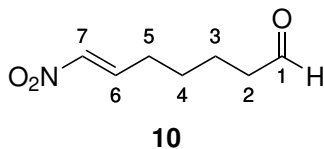

To a solution of ethyl **S1** (2.945g, 14.7 mmol) and anhydrous  $\text{CH}_2\text{Cl}_2$  (80 mL) at  $-78^\circ\text{C}$  was added DIBAL-H (1M in hexane, 16.9 mL, 16.9 mmol) dropwise in 15 minutes. The progress of the reaction was monitored by TLC and the reaction went to completion in 4 hours. An aqueous solution of HCl (1M, 50 mL) was added and the reaction mixture was left to stir overnight at rt. Then,  $\text{H}_2\text{O}$  (80 mL) was added and the organic phase was extracted with  $\text{CH}_2\text{Cl}_2$  (3 x 80 mL). The combined organic phase was dried ( $\text{Na}_2\text{SO}_4$ ), filtered and concentrated *in vacuo*. Purification by combiflash (silica gel, gradient up to 40% diethyl ether in hexane) afforded the titled compound **10** as a colourless oil (0.864 g, 5.5 mmol, 37% yield). IR (neat,  $\text{cm}^{-1}$ ) 2937, 1719, 1648, 1517, 1347;  $^1\text{H}$  NMR (400 MHz,  $\text{CDCl}_3$ )  $\delta$  9.78 (1H, t,  $J = 1.4$  Hz, H-1), 7.33 - 7.13 (1H, m, H-6), 6.99 (1H, dt,  $J = 13.4, 1.6$  Hz, H-7), 2.50 (2H, td,  $J = 7.1, 1.4$  Hz, H-2), 2.30 (2H, td,  $J = 7.4, 1.6$  Hz, H-5), 1.92 - 1.60 (2H, m, H-3), 1.62 - 1.37 (2H, m, H-4).  $^{13}\text{C}$  NMR (101 MHz,  $\text{CDCl}_3$ )  $\delta$  201.6 (C-1), 141.78 (C-6), 139.90 (C-7), 43.41 (C-2), 28.26 (C-5), 27.19 (C-4), 21.42 (C-3). HRMS required for  $\text{C}_7\text{H}_{12}\text{NO}_3$   $[\text{M}+\text{H}]^+$  is 158.0817, found 158.0821.

## Method B for the synthesis of the *endo*-nitroolefin **10**.

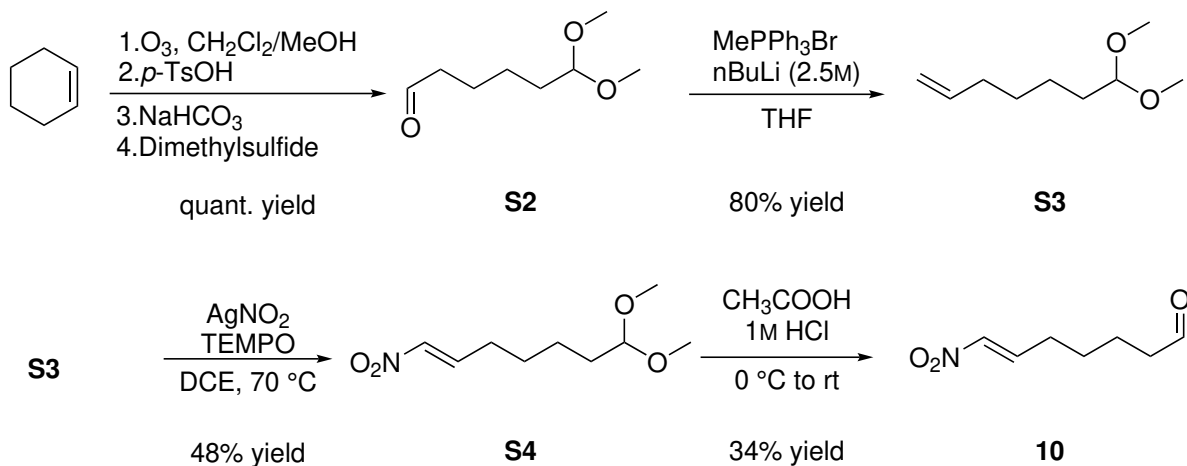

Figure S3: Synthesis of substrate **10** according to the synthetic procedure described in method B.

### 6,6-dimethoxyhexanal **S2**<sup>7</sup>

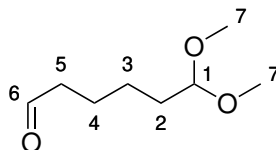

A three neck round bottom flask was heat dried and each neck was respectively occupied by a drying tube loaded with CaCl as outlet, a glass stopper and the ozoniser inlet. Cyclohexene (7.6 mL, 75 mmol) was dissolved in a solution of CH<sub>2</sub>Cl<sub>2</sub> (250 mL) and MeOH (50 mL) and it was then cooled to -78 °C. O<sub>3</sub> was then bubbled through the solution until a light blue colour developed. Excess of O<sub>3</sub> was removed by bubbling through the reaction mixture N<sub>2</sub> until the blue colour was discharged. The reaction mixture was then left to warm up to rt and the drying tube and the ozone inlet were replaced with rubber septums. p-tosylic acid monohydrate (10% *w/w*, 1.215 g) was added to the solution and then it was left stirring at rt under N<sub>2</sub> for 90 min. NaHCO<sub>3</sub> (4mol-eq, 2.147g) was added followed by dimethyl sulphide

(12 mL, 163.4 mmol) after 15 minutes. The reaction mixture was left stirring overnight and then concentrated up to 50 mL of solution. Then, it was diluted with CH<sub>2</sub>Cl<sub>2</sub> (100 mL) and washed with H<sub>2</sub>O (75 mL). The aqueous phase was extracted with CH<sub>2</sub>Cl<sub>2</sub> (2 x 100 mL). The combined organic layers were washed with H<sub>2</sub>O (100 mL) and the aqueous phase was extracted with a final portion of CH<sub>2</sub>Cl<sub>2</sub> (100 mL). The organic layers were dried over Na<sub>2</sub>SO<sub>4</sub>, filtered and concentrated *in vacuo*. The product **S2** was obtained as a colourless oil (12.6 g, 12 mmol, quantitative yield) and it was used for the following reaction without further purification. IR (neat, cm<sup>-1</sup>) 2946, 2830, 1724, 1460, 1387, 1191, 1126, 1071, 1050; <sup>1</sup>H NMR (400 MHz, CDCl<sub>3</sub>) δ 9.75 (1 H, s, H-6), 4.34 (1 H, t, *J* 5.7, H-1), 3.30 (6 H, s, H-7), 2.43 (2 H, td, *J* 7.3, 1.7, H-5), 1.82 – 1.51 (4 H, m, H-4, H-2), 1.45 – 1.31 (2 H, m, H-3). <sup>13</sup>C NMR (101 MHz, CDCl<sub>3</sub>) δ 202.5 (C-6), 104.3 (C-1), 52.8 (C-7), 43.8 (C-5), 32.3 (C-2), 24.2 (C-3), 21.9 (C-4); HRMS required for C<sub>8</sub>H<sub>17</sub>O<sub>3</sub> [M+H]<sup>+</sup> is 161.1178, found 161.1180.

### 7,7-dimethoxyhept-1-ene **S3**<sup>8</sup>

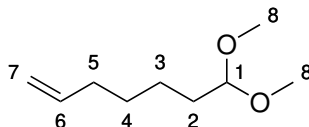

**S3**

To a suspension solution of MePPh<sub>3</sub>Br (53.6 g, 150 mmol) in THF (180 mL) at 0 °C was added *n*BuLi (2.5M in hexane, 60 mL, 150 mmol) dropwise and the reaction mixture was left stirring at 0 °C for 30 minutes. A solution of **S2** in THF (48 mL) was then added dropwise in 15 minutes. The reaction mixture was then left stirring at rt for 46 hours. A saturated aqueous solution of NH<sub>4</sub>Cl (420 mL) was added. The organic phase was extracted with diethyl ether (3 x 300 mL) and then washed with brine (250 mL). The combined organic phases were dried over Na<sub>2</sub>SO<sub>4</sub>, filtered and then concentrated *in vacuo* keeping the water bath at a max temperature of 30 °C and a pressure of 100 mbar to avoid any evaporation of the targeted product. The concentrated organic phase was then filtered through a short pad

of silica and washed with a mixture of diethyl ether and pentane (1:1, 1.2 L). The organic solvent was concentrated again *in vacuo* to afford a colourless oil as pure product **S3** (9.5 g, 60.0 mmol, 80% yield).  $^1\text{H}$  NMR (400 MHz,  $\text{CDCl}_3$ )  $\delta$  5.80 (1 H, ddt,  $J = 16.9, 10.2, 6.7$ , H-6), 5.05 – 4.87 (1 H, m, H-7), 4.36 (1 H, t,  $J = 5.8$ , H-1), 3.31 (6 H, s, H-8), 2.19 – 1.94 (2 H, m, H-5), 1.73 – 1.47 (2 H, m, H-2), 1.49 – 1.25 (4 H, m, H-4, H-3).  $^{13}\text{C}$  NMR (101 MHz,  $\text{CDCl}_3$ )  $\delta$  138.8 (C-6), 114.4 (C-7), 104.5 (C-1), 52.6 (C-8), 33.7 (C-5), 32.3 (C-2), 28.8 (C-4), 24.1 (C-3).

**(*E*)-7,7-dimethoxy-1-nitrohept-1-ene S4**

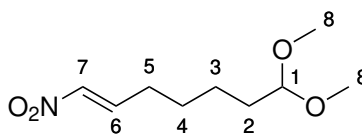

**S4**

To a heat dried two-neck round bottomed flask charged with magnetic stir-bar was added activated 4Å molecular sieves (2 g),  $\text{AgNO}_2$  (40.4 g, 238 mmol) and TEMPO (3.7 g, 23.8 mmol). Olefin **S3** (9.4 g, 59.6 mmol) and anhydrous DCE (186 mL) were added. The round bottomed flask was then placed in a preheated oil bath at 70 °C and the reaction mixture was left stirring vigorously. The progress of the reaction was monitored by TLC and after 17 hours the reaction mixture was left to cool down to rt. The reaction mixture was then filtered through a short pad of celite washed with ethyl acetate (1 L) and concentrated *in vacuum*. The crude product was then purified *via* combiflash using silica gel columns and a gradient solution of ethyl acetate and hexane up to 30% diethyl ether in hexane to afford the titled compound **S4** as a colourless oil (5.8, 28.5 mmol, 48%).  $^1\text{H}$  NMR (400 MHz,  $\text{CDCl}_3$ )  $\delta$  7.23 – 7.12 (1 H, m, H-6), 6.89 (1 H, dt,  $J = 13.4, 1.5$ , H-7), 4.47 – 4.03 (1 H, m, H-1), 3.22 (6 H, d,  $J = 3.8$ , H-8), 2.19 (2 H, qd,  $J = 7.4, 1.6$ , H-5), 1.72 – 1.39 (4 H, m, H-2, H-4), 1.39 – 1.22 (2 H, m, H-3).  $^{13}\text{C}$  NMR (101 MHz,  $\text{CDCl}_3$ )  $\delta$  142.3 (C-6), 139.7 (C-7), 104.3 (C-1), 52.9 (C-8), 32.2 (C-2), 28.4 (C-5), 27.6 (C-4), 24.1 (C-3).

### (*E*)-7-nitrohept-6-enal **10**

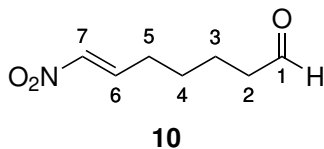

To neat acetal **S4** (2.940 g, 14.5 mmol), glacial acetic acid (14.5 mL) was added at 0 °C and, as soon as frozen, HCl (1N, 4.8 mL) was added. The reaction mixture was left stirring at rt. The progress of the reaction was monitored by TLC and <sup>1</sup>H NMR and after 20 hours CH<sub>2</sub>Cl<sub>2</sub> (30 mL) was added to the reaction mixture and washed with H<sub>2</sub>O (2 x 50 mL) and a saturated aqueous solution of NaHCO<sub>3</sub> (50mL). The organic phase was back extracted with CH<sub>2</sub>Cl<sub>2</sub> (3 x 50 mL) and then the organic phases were combined, dried (Na<sub>2</sub>SO<sub>4</sub>), filtered and concentrated *in vacuo* with a 30 °C water bath temperature at a max pressure of 100 mbar. Purification by combiflash (silica gel, gradient up to 55% diethyl ether in pentane) afforded the titled compound as a colourless oil (0.760 g, 4.8 mmol, 34% yield). The characterisation of compound **10** was described in method A.

### Optimised synthesis of the nitroalcohol *cis*-**11**

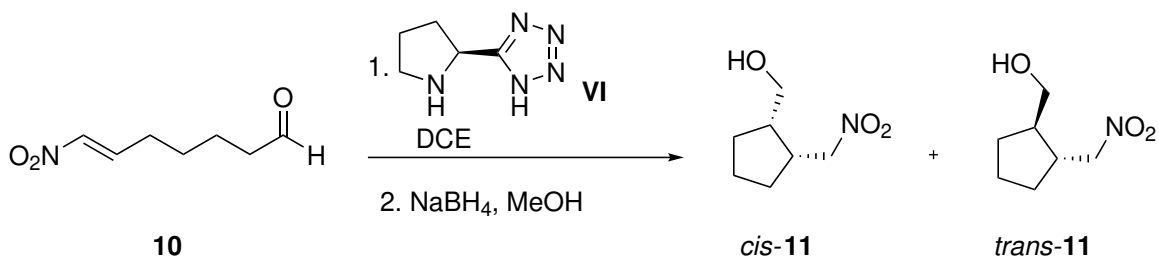

Figure S4: Synthetic procedure for the synthesis of *cis*-**11**

### ((1*S*,2*R*)-2-(nitromethyl)cyclopentyl)methanol **11**

To a solution of (*S*)-(-)-5-(2-pyrrolidinyl)-1H-tetrazole (5 mol%, 0.35 mmol, 0.051 g) and DCE (130 mL) previously sonicated for 30 min was added the nitroolefin **10** (1.104 g, 7.0

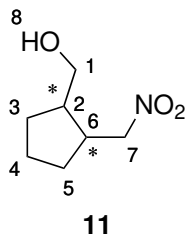

mmol) at -20 °C dropwise in 3 min followed by DCE (5 mL) to wash the syringe used and the sides of the reaction flask. The reaction mixture was left stirring at -20 °C for 99 hours. The progress of the reaction was monitored by TLC and  $^1\text{H}$  NMR. Once the reaction went to completion the reaction was reduced *in situ*.  $\text{NaBH}_4$  (0.397 g, 10.5 mmol) was added at -20 °C followed by MeOH (10.9 mL). The reaction went to completion in 1 hour. A saturated aqueous solution of  $\text{NH}_4\text{Cl}$  (15 mL) was added, followed by brine (50 mL) and  $\text{H}_2\text{O}$  (20 mL). The organic phase was extracted first with a mixture of chloroform and isopropanol (3:1, 80 mL x 5), then with diethyl ether (3 x 150 mL) and finally with ethyl acetate (3 x 100 mL) because of the high affinity of the product with the aqueous phase. The organic phase was then dried ( $\text{Na}_2\text{SO}_4$ ), filtered and concentrated *in vacuo*. The crude product was then purified by flash chromatography on silica gel (25% ethyl acetate in hexane) to afford separately both diastereomers, *cis* and *trans*, as a colourless oil (0.820 g, 9:1 *cis/trans* ratio, 74%). *Cis*-**11**: 92% *ee*;  $[\alpha]^{20}_D$  -14 ( $c = 0.1$ ,  $\text{CH}_2\text{Cl}_2$ ). IR (neat,  $\text{cm}^{-1}$ ) 3376, 2958, 2877, 1543, 1383, 1022;  $^1\text{H}$  NMR (400 MHz,  $\text{CDCl}_3$ )  $\delta$  4.55 (2H, ABX,  $J_{AX} = 6.6$  Hz,  $J_{BX} = 9.1$  Hz,  $J_{AB} = 12.7$ ,  $\nu_{AB} = 138.5$ , H-7), 3.67 – 3.50 (2H, m, H-1), 2.87 – 2.71 (1H, m, H-6), 2.38 – 2.25 (1H, m, H-2), 1.91 – 1.79 (2H, m, H-5' and H-3'), 1.79 – 1.69 (1H, m, H-4'), 1.71 – 1.56 (1H, m, H-4''), 1.57 – 1.32 (2H, m, H-5'', H3'').  $^{13}\text{C}$  NMR (101 MHz,  $\text{CDCl}_3$ )  $\delta$  C 77.2 (C-7), 63.2 (C-1), 43.1 (C-2), 40.3 (C-6), 29.3 (C-5), 28.0 (C-3), 23.1 (C-4); HRMS required for  $\text{C}_7\text{H}_{43}\text{NO}_3$   $[\text{M}+\text{H}]^+$  is 160.0974, found 160.0980. HPLC analysis: Chiralpack OD, 2% isopropanol in hexane, flow rate = 0.8 mL/min,  $\lambda = 210$  nm. *Trans*-**11**: 45% *ee*;  $[\alpha]^{20}_D$  - 8 ( $c = 0.1$ ,  $\text{CH}_2\text{Cl}_2$ ).  $^1\text{H}$  NMR (400 MHz,  $\text{CDCl}_3$ )  $\delta$  4.44 (2 H, ABX,  $J_{AX} = 5.7$  Hz,  $J_{BX} = 8.8$  Hz,  $J_{AB} = 11.8$  Hz,  $\nu_{AB} = 110.5$ , H-7), 3.77 - 3.50 (2 H, m, H-1), 2.54 - 2.38 (1 H, m, H-6),

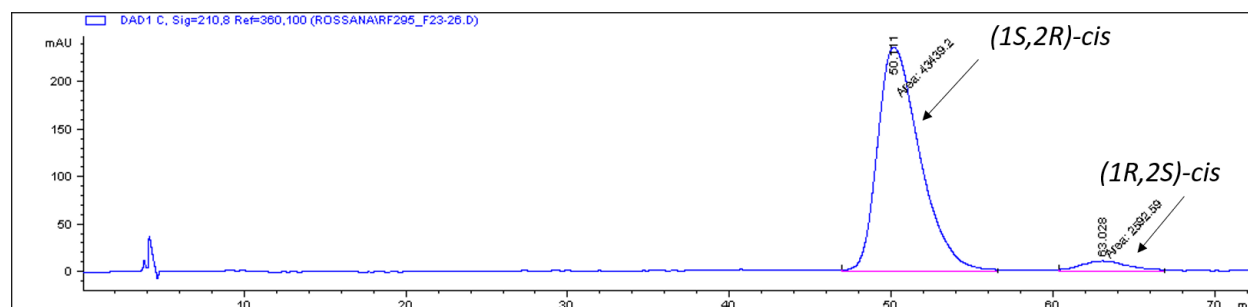

Figure S5: HPLC trace of *cis*-**11**.

2.01 - 1.88 (1 H, m, H-5'), 1.88 - 1.75 (2 H, m, H-2 and H-3'), 1.71 - 1.53 (2 H, m, H-4), 1.53 - 1.33 (1 H, m, H-5'' and H-3'').  $^{13}\text{C}$  NMR ( $\text{CDCl}_3$ , 101 MHz)  $\delta$  79.1 (C-7), 64.9 (C-1), 44.1 (C-2), 40.6 (C-6), 29.8 (C-5), 27.9 (C-3), 23.1 (C-4). HPLC analysis: Chiralpack AS, 1% isopropanol in hexane, flow rate = 1 mL/min,  $\lambda$  = 230 nm.

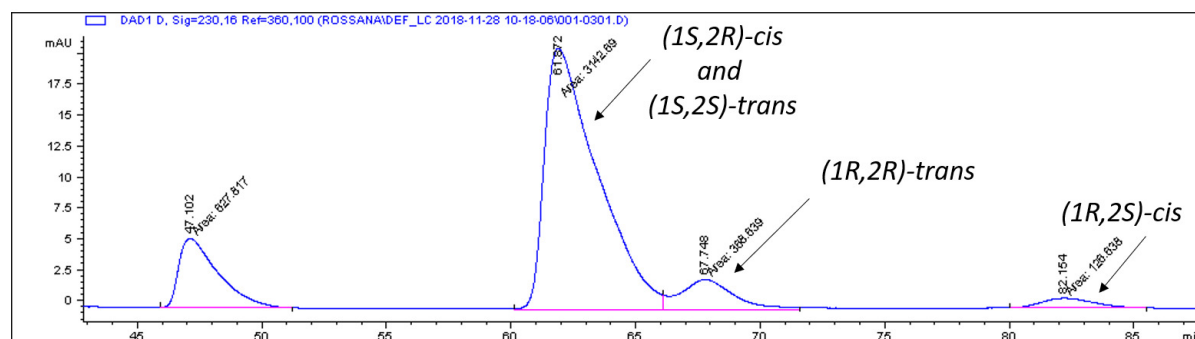

Figure S6: HPLC trace of *trans*-**11**. Separation of *Trans*-**11** from the *cis*-diastereomer was not possible, therefore the *ee* was calculated subtracting the area corresponding to the *cis*-peak overlapping with the *trans*. This was possible because one of the two *cis*-enantiomer peaks was separate and the area for the other enantiomer was calculated knowing the *ee* of the *cis* diastereomer that was independently obtained.

## Synthesis of nitroalcohol derivative **12**

((1*S*,2*R*)-2-(nitromethyl)cyclopentyl)methyl (1*S*,4*R*)-4,7,7-trimethyl-3-oxo-2-oxabicyclo[2.2.1]heptane-1-carboxylate **12**

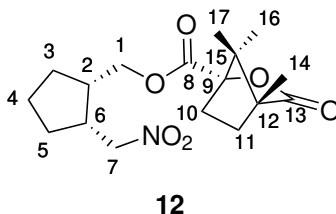

To a solution of compound *cis*-**11** (0.040 g, 0.25 mmol) and imidazole (17  $\mu$ l, 0.30 mmol) in anhydrous THF (2.5 mL), (*S*)-(-)-camphanic chloride was added at 0 °C. The reaction mixture was refluxed for 4 hours and then left stirring at rt for 20 more hours as the reaction was not gone to completion yet. Then, H<sub>2</sub>O (5 mL) was added and the organic phase was extracted with diethyl ether (3 x 10 mL), then dried (Na<sub>2</sub>SO<sub>4</sub>), filtered and concentrated *in vacuo*. The crude was then recrystallised to obtain the X-ray crystal of the titled compound **12**. mp = 71.5 - 73.6 °C;  $[\alpha]_D^{20}$  - 12.0 (*c* = 0.1, CH<sub>2</sub>Cl<sub>2</sub>); IR (neat, cm<sup>-1</sup>) 2969, 1778, 1743, 1546, 1449, 1398, 1381, 1315, 1266, 1225, 1173, 1154, 1113, 1063, 1034, 1020; <sup>1</sup>H NMR (400 MHz, CDCl<sub>3</sub>)  $\delta$  4.36 (2H, ABX,  $J_{AX}$  = 6.7 Hz,  $J_{BX}$  = 8.9 Hz,  $J_{AB}$  = 12.6 Hz,  $\nu_{AB}$  = 96,4 Hz, H-7), 4.10 (2H, qd,  $J$  = 11.5, 6.7, H-1), 2.85 - 2.70 (1H, m, H-6), 2.51 - 2.42 (1H, m, H-2), 2.42 - 2.29 (1H, m, H-10'), 2.06 - 1.92 (1H, m, H-10''), 1.92 - 1.77 (3H, m, H-5'and H-4', H-11'), 1.72 (2H, m, H-3), 1.68 - 1.51 (1H, m, H-11''), 1.51 - 1.31 (3H, m, H-4''and H-5'') 1.05 (3H, s, H-14), 1.00 (3H, s, H-16), 0.90 (3H, s, H-17). <sup>13</sup>C NMR (101 MHz, CDCl<sub>3</sub>)  $\delta$  178.0 (C-13), 167.5 (C-8), 91.0 (C-9), 76.5 (C-7), 65.3 (C-1), 54.8 (C-12), 54.3 (C-15), 40.2 (C-6), 39.9 (C-2), 30.7 (C-10), 29.0 (C-11), 28.9 (C-5), 28.1 (C-4), 22.6 (C-3), 16.8 (C-16), 16.8 (C-17), 9.7 (C-14). HRMS required for C<sub>17</sub>H<sub>26</sub>NO<sub>6</sub> [M+H]<sup>+</sup> is 340.1760, found 340.1762.



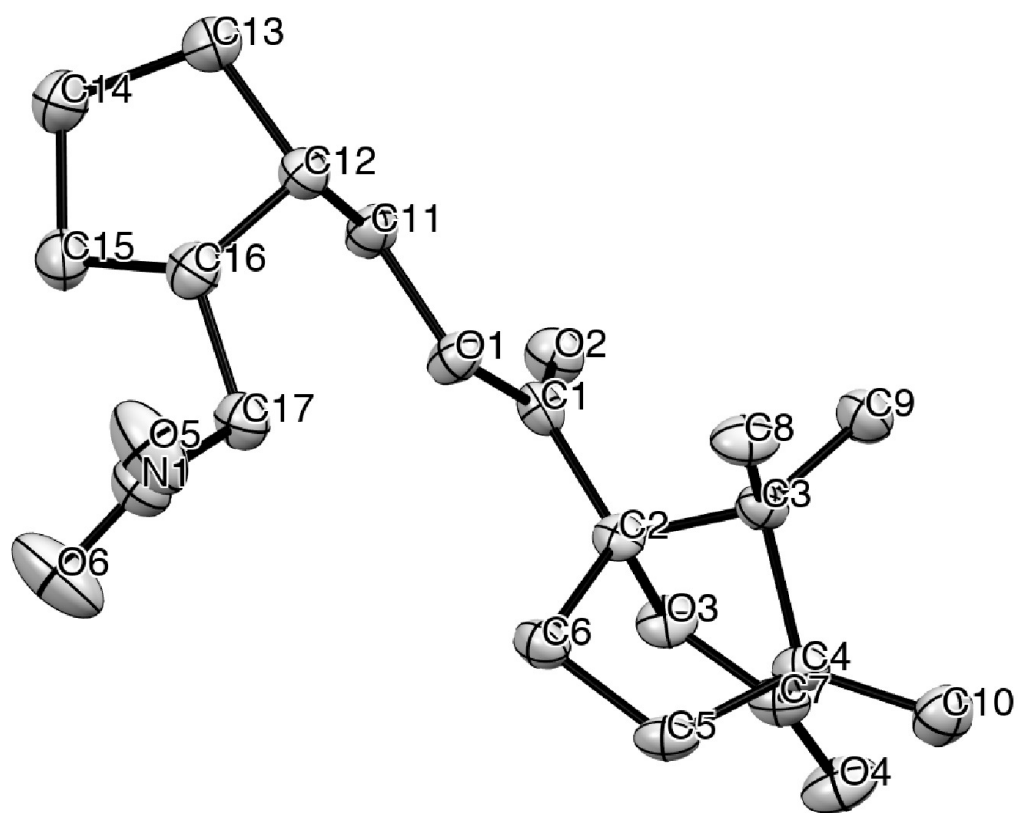

Figure S7: X-ray crystal structure of the nitro alcohol derivative **12**

Table S10: Crystal data and structure refinement for RF266A.

|                                                |                                                    |
|------------------------------------------------|----------------------------------------------------|
| Identification code                            | RF266A                                             |
| Empirical formula                              | C <sub>17</sub> H <sub>25</sub> NO <sub>6</sub>    |
| Formula weight                                 | 339.38                                             |
| Temperature/K                                  | 153(5)                                             |
| Crystal system                                 | monoclinic                                         |
| Space group                                    | P2 <sub>1</sub>                                    |
| a/Å                                            | 6.4204(2)                                          |
| b/Å                                            | 11.9299(4)                                         |
| c/Å                                            | 11.1764(4)                                         |
| $\alpha/^\circ$                                | 90                                                 |
| $\beta/^\circ$                                 | 95.772(3)                                          |
| $\gamma/^\circ$                                | 90                                                 |
| Volume/Å <sup>3</sup>                          | 851.71(5)                                          |
| Z                                              | 2                                                  |
| $\rho_{calc}/\text{cm}^3$                      | 1.323                                              |
| $\mu/\text{mm}^{-1}$                           | 0.832                                              |
| F(000)                                         | 364.0                                              |
| Crystal size/mm <sup>3</sup>                   | 0.09 × 0.07 × 0.05                                 |
| Radiation                                      | CuK $\alpha$ ( $\lambda = 1.54184$ )               |
| 2 $\Theta$ range for data collection/ $^\circ$ | 7.95 to 119.994                                    |
| Index ranges                                   | -7 ≤ h ≤ 6, -13 ≤ k ≤ 13, -12 ≤ l ≤ 12             |
| Reflections collected                          | 6574                                               |
| Independent reflections                        | 2431 [ $R_{int} = 0.0266$ , $R_{sigma} = 0.0283$ ] |
| Data/restraints/parameters                     | 2431/1/220                                         |
| Goodness-of-fit on F <sup>2</sup>              | 1.097                                              |
| Final R indexes [ $I_c=2\sigma$ (I)]           | $R_1 = 0.0292$ , $wR_2 = 0.0719$                   |
| Final R indexes [all data]                     | $R_1 = 0.0310$ , $wR_2 = 0.0737$                   |
| Largest diff. peak/hole / e Å <sup>-3</sup>    | 0.15/-0.17                                         |
| Flack parameter                                | -0.10(9)                                           |

## Synthetic procedure for the synthesis of ketones **S7**

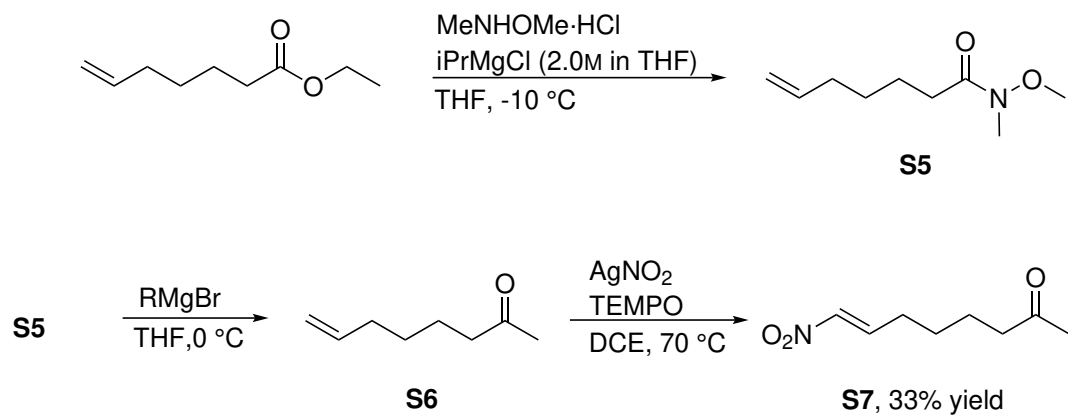

Scheme S1: Synthesis of ketones

### ***N*-methoxy-*N*-methylhept-6-enamide **S5****

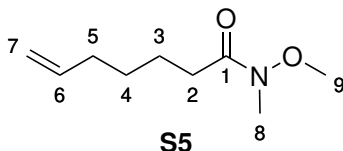

To a solution of *N,O*-dimethylhydroxylamine hydrochloride (4.84 g, 49.6 mmol) in anhydrous THF (50 mL) was added a solution of ethyl-6-heptenoate in anhydrous THF (14 mL). The reaction mixture was then cooled to -15 °C and *iPr*MgCl (2.0M in THF, 48 mL) was added steadily dropwise in 30 min. The reaction mixture was stirred at -10° for 2 h and then a saturated aqueous solution of NH<sub>4</sub>Cl (50 mL). The organic phase was extracted with diethyl ether (3 x 50 mL) and then washed with brine (50 mL). The combined organic layers were then dried (MgSO<sub>4</sub>), filtered and concentrated *in vacuo*. The crude product was purified *via* flash chromatography on silica gel (30% EtOAc in Hex) to afford the titled product in quantitative yield as a colourless oil. IR (neat, cm<sup>-1</sup>) 2938, 1664, 1652, 1414, 1384, 1177, 993, 909; <sup>1</sup>H NMR (CDCl<sub>3</sub>, 400 MHz)  $\delta$  5.74 (1H, ddt, *J* = 16.9, 10.2, 6.7 Hz, H-6), 5.02 – 4.75 (2H, m, H-7), 3.61 (3H, s, H-9), 3.11 (3H, s, H-8), 2.36 (2H, t, *J* = 7.6 Hz, H-2), 2.13 – 1.93 (2H, m, H-5), 1.68 – 1.51 (2H, m, H-3), 1.46 – 1.27 (2H, m, H-4). <sup>13</sup>C NMR (CDCl<sub>3</sub>, 101 MHz)  $\delta$  138.7 (C-6), 114.6 (C-7), 61.2 (C-9), 33.6 (C-5), 32.2 (C-8), 31.7 (C-2), 28.7 (C-4), 24.2 (C-3). HRMS required for C<sub>9</sub>H<sub>17</sub>NO<sub>2</sub> [M+H]<sup>+</sup> 172.1332, found 172.1333.

### **Oct-7-en-2-one **S6****

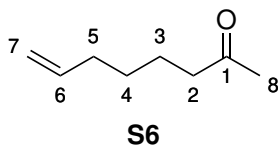

To a solution of **S5** (1.37 g, 8.0 mmol) in anhydrous THF (80 mL) at 0 °C, methylmagnesium bromide (3.0M in THF, 10.7 mL) was added dropwise in 15 min. The reaction was left stirring at 0 °C for 30 min and then a saturated aqueous solution of NH<sub>4</sub>Cl (50 mL)

was slowly added. The organic phase was extracted with diethyl ether and then washed with brine. The combined organic layers were dried (MgSO<sub>4</sub>), filtered and concentrated at a maximum pressure of 100 mbar keeping the water bath at 25 °C to avoid any evaporation of the volatile product to finally achieve the desired product **S6** as a colourless oil (0.90 g, 89% yield). IR (neat, cm<sup>-1</sup>) 2933, 1715, 1642, 1413, 1359, 1164, 995, 910; <sup>1</sup>H NMR (CDCl<sub>3</sub>, 400 MHz)  $\delta$  5.72 (1H, ddt,  $J$  = 16.9, 10.2, 6.7 Hz, H-6), 5.06 – 4.82 (2H, m, H-7), 2.38 (1H, d,  $J$  = 7.4 Hz, H-2), 2.07 (3H, s, H-8), 2.04 – 1.92 (2H, m, H-5), 1.64 – 1.49 (1H, m, H-3), 1.45 – 1.25 (2H, m, H-4). <sup>13</sup>C NMR (CDCl<sub>3</sub>, 101 MHz)  $\delta$  209.2 (C-1), 138.5 (C-6), 114.7 (C-7), 43.6 (C-2), 33.5 (C-5), 29.9 (C-8), 28.4 (C-4), 23.3 (C-3). HRMS required for C<sub>8</sub>H<sub>15</sub>O [M+H]<sup>+</sup> 127.1120, found 127.1117.

### (*E*)-8-nitrooct-7-en-2-one **S7**

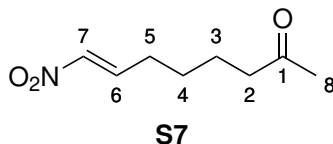

To a solution of AgNO<sub>2</sub> (4.49 g, 26.4 mmol), TEMPO (0.625 g, 4.0 mmol), 4Å molecular sieves (2 g) in anhydrous DCE (32 mL), **S6** (1.05 g, 8 mmol) was added and the reaction mixture was left stirring in a close reaction tube at 70 °C for 16 hours. The reaction mixture was then left to cool down to rt and then filtered over a short pad of celite and washed with EtOAc. The crude product was then purified *via* combiflash on silica gel (gradient 0-20% ethyl acetate in hexane) to afford the titled product as a colourless oil (0.45 g, 33% yield). <sup>1</sup>H NMR (CDCl<sub>3</sub>, 400 MHz)  $\delta$  7.29 – 7.12 (1H, m, H-6), 6.93 (1H, dt,  $J$  = 13.5, 1.6 Hz, H-7), 2.41 (2H, t,  $J$  = 7.0 Hz, H-2), 2.23 (2H, qd,  $J$  = 7.3, 1.6 Hz, H-5), 2.08 (3H, s, H-8), 1.65 – 1.52 (2H, m, H-3), 1.52 – 1.40 (2H, m, H-4). <sup>13</sup>C NMR (CDCl<sub>3</sub>, 101 MHz)  $\delta$  208.2 (C-1), 142.1 (C-6), 139.8 (C-7), 43.0 (C-2), 30.0 (C-8), 28.4 (C-5), 27.2 (C-4), 23.0 (C-3). HRMS required for C<sub>8</sub>H<sub>13</sub>NO<sub>3</sub> [M+H]<sup>+</sup> 172.0974, found 172.0980.

## Synthesis of nitroolefin S12

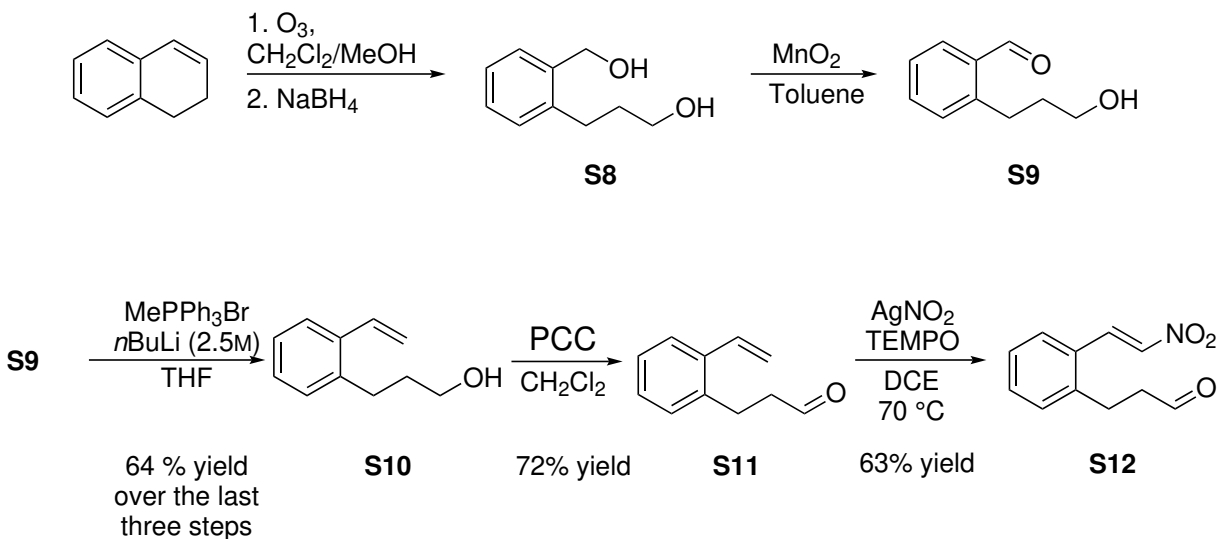

Scheme S2: Synthesis of the indane derivative precursor

### 3-(2-vinylphenyl)propan-1-ol S10<sup>9</sup>

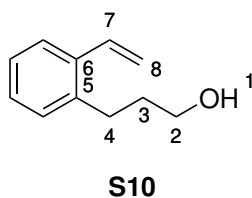

1,2-dihydronaphthalene (3.0 g, 23 mmol) was dissolved in a mixture of  $\text{CH}_2\text{Cl}_2$  and MeOH ( $V/V$  1:1, 120 mL) and the mixture was cooled to  $-78^\circ\text{C}$ .  $\text{O}_3$  was then bubbled through until a blue colour developed. Excess of  $\text{O}_3$  was removed bubbling through  $\text{N}_2$  until the blue colour was discharged.  $\text{NaBH}_4$  (1.74 g, 46.0 mmol) was added slowly and then the reaction mixture was stirred at rt for 1 h. The reaction was quenched with saturated aq.  $\text{NH}_4\text{Cl}$  solution (100 mL) and then the organic phase was extracted with  $\text{CH}_2\text{Cl}_2$  (3 x 100 mL). The combined organic layers were dried over  $\text{Na}_2\text{SO}_4$ , filtered and concentrated *in vacuo* to afford compound S8 as a dense colourless liquid. The obtained product did not require any further purification before the following step. To a solution of S8 (3.30 g, 19.9 mmol) in

toluene (81 mL) was added activated MnO<sub>2</sub> powder (8.63 g, 99.3 mmol) every hour for the first three hours for a total of 15 eq. added. The reaction mixture was left stirring at rt for further 18 h. MnO<sub>2</sub> was filtered through a short pad of celite, washed with ethyl acetate (250 mL) and concentrated *in vacuo*. Compound **S9** was used for Wittig olefination without further purification. To a suspension of MePPh<sub>3</sub>Br (10.7 g, 30.0 mmol) in THF (36 mL) was added *n*buLi (2.5M in hexane, 12 mL) dropwise at 0°C. The reaction mixture was stirred at 0°C for 30 min and then a solution of **S9** (2.46 g, 15.0 mmol) in THF (9.5 mL) was added dropwise. The reaction mixture was left stirring at rt for 20 hours and then it was quenched with a saturated aq. solution of NH<sub>4</sub>Cl (85 mL) at 0°C. The organic phase was extracted with diethyl ether (3 x 90 mL) and then combined organic layers were then dried over Na<sub>2</sub>SO<sub>4</sub>, filtered and concentrated *in vacuo*. The residue was purified *via* combiflash on silica gel (gradient from 20 to 30% ethyl acetate in hexane) to afford the titled product **S10** as a colourless oil (2.03 g, 64% yield for three steps). <sup>1</sup>H NMR (CDCl<sub>3</sub>, 400 MHz)  $\delta$  7.60 – 7.44 (1H, m, Ar-H), 7.26 – 7.14 (3H, m, Ar-H), 7.04 (1H, dd, *J* = 17.3, 10.9 Hz, H-7), 5.68 (1H, dd, *J* = 17.3, 1.4 Hz, H-8), 5.33 (1H, dd, *J* = 11.0, 1.4 Hz, H-8), 3.70 (2H, t, *J* = 6.3 Hz, H-2), 2.91 – 2.74 (2H, m, H-4), 1.97 – 1.79 (2H, m, H-3), 1.45 (1H, s, H-1). <sup>13</sup>C NMR (CDCl<sub>3</sub>, 101 MHz)  $\delta$  139.2 (C-6), 136.5 (C-5), 134.6 (C-7), 129.5 (Ar-C), 127.9 (Ar-C), 126.4 (Ar-C), 125.9 (Ar-C), 115.6 (C-8), 62.3 (C-2), 33.8 (C-3), 29.4 (C-4).

### 3-(2-vinylphenyl)propanal **S11**<sup>9</sup>

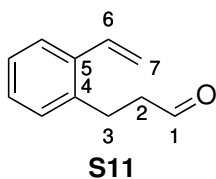

To a solution of **S10** (0.487 g, 3.0 mmol) in CH<sub>2</sub>Cl<sub>2</sub> (17 mL) was added a solution of PCC (1.29 g, 6.0 mmol) in CH<sub>2</sub>Cl<sub>2</sub> (3 mL) and the reaction mixture was left stirring at rt for 3 h. Silica gel was added and the crude product was purified *via* combiflash on silica

gel (gradient up to 10% ethyl acetate in hexane) to afford compound **S11** as a colourless oil (0.346 g, 72% yield).  $^1\text{H}$  NMR ( $\text{CDCl}_3$ , 400 MHz)  $\delta$  9.84 (1H, t,  $J = 1.4$  Hz, H-1), 7.64 – 7.47 (1H, m, Ar-H), 7.40 – 7.12 (3H, m, Ar-H), 6.97 (1H, dd,  $J = 17.3, 11.0$  Hz, H-6), 5.68 (1H, dd,  $J = 17.3, 1.4$  Hz, H-7), 5.36 (1H, dd,  $J = 11.0, 1.4$  Hz, H-7), 3.04 (2H, dd,  $J = 8.4, 7.1$  Hz, H-3), 2.76 (2H, ddd,  $J = 8.7, 7.1, 1.4$  Hz, H-2).  $^{13}\text{C}$  NMR ( $\text{CDCl}_3$ , 101 MHz)  $\delta$  201.4 (C-1), 137.6 (C-5), 136.6 (C-4), 134.2 (C-6), 129.3 (Ar-C), 128.0 (Ar-C), 126.8 (Ar-C), 126.2 (Ar-C), 116.3 (C-7), 44.8 (C-2), 25.6 (C-3). HRMS required for  $\text{C}_{11}\text{H}_{13}\text{O}$   $[\text{M}+\text{H}]^+$  161.0966, found 161.0970.

### (*E*)-3-(2-(2-nitrovinyl)phenyl)propanal **S12**

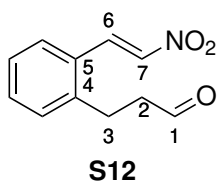

To an oven-dried quick-fit cap test tube charged with magnetic stir-bar was added activated 4Å molecular sieves (0.15 g),  $\text{AgNO}_2$  (1.00 g, 5.9 mmol) and TEMPO (0.125 g, 0.8 mmol). Compound **S11** (0.314 g, 2.0 mmol) and anhydrous DCE (8 mL) were added. The tube was then placed in a preheated oil bath at 70 °C and the reaction mixture was left stirring vigorously for 17 hours. The progress of the reaction was monitored by TLC and then the reaction mixture was left to cool down to rt. The reaction mixture was then filtered through a short pad of celite washed with ethyl acetate (250 mL) and concentrated *in vacuum*. The crude product was then purified *via* combiflash using silica gel columns (gradient up to 20% ethyl acetate in hexane) to afford the titled compound **S12** as a yellow solid (0.257 g, 63% yield). mp = 63.0 - 64.8 °C IR (neat,  $\text{cm}^{-1}$ ) 2841, 1713, 1700, 1627, 1597, 1500, 1331, 1299, 1270, 1211, 966, 957, 774, 750, 606;  $^1\text{H}$  NMR ( $\text{CDCl}_3$ , 400 MHz)  $\delta$  9.85 (1H, t,  $J = 1.1$  Hz, H-1), 8.35 (1H, d,  $J = 13.5$  Hz, H-7), 7.62 – 7.51 (2H, m, H-6 and Ar-H), 7.50 – 7.39 (1H, m, Ar-H), 7.33 (1H, d,  $J = 7.6$  Hz, Ar-H), 7.32 - 7.29 (1H, m, Ar-H) 3.15



(2H, t,  $J = 7.4$  Hz, H-3), 2.82 (2H, td,  $J = 7.5, 1.1$  Hz, H-2).  $^{13}\text{C}$  NMR ( $\text{CDCl}_3$ , 101 MHz)  $\delta$  200.0 (C-1), 141.5 (C-5), 138.3 (C-6), 136.0 (C-7), 132.1 (Ar-C), 130.4 (Ar-C), 128.6 (C-4), 127.6 (Ar-C), 127.4 (Ar-C), 44.9 (C-2), 25.3 (C-3). HRMS required for  $\text{C}_{11}\text{H}_{10}\text{NO}_3$   $[\text{M-H}]^-$  204.0661, found 204.0665.

## Organocatalytic products S7 and 14

### General procedure C for the organocatalytic reactions

To a solution of (*S*)-(-)-5-(2-pyrrolidinyl)-1H-tetrazole (5 mol%) and DCE (0.05M) previously sonicated for 30 min was added the nitroolefin (1 eq.) at  $-20^\circ\text{C}$  dropwise in 3 min followed by DCE to wash the syringe used and the sides of the reaction flask. The reaction mixture was left stirring at  $-20^\circ\text{C}$  until completion of the reaction.  $\text{NaBH}_4$  (1.5 eq.) was added at  $-20^\circ\text{C}$  followed by MeOH. The reaction went to completion in 1 hour. A saturated aqueous solution of  $\text{NH}_4\text{Cl}$  was added, followed by brine and  $\text{H}_2\text{O}$ . The organic phase was extracted first with a mixture of chloroform and isopropanol ( $V/V$ , 3:1), then with diethyl ether and finally with ethyl acetate because of the high affinity of the product with the aqueous phase. The organic phase was then dried ( $\text{Na}_2\text{SO}_4$ ), filtered and concentrated *in vacuo*. The crude product was then purified by flash chromatography on silica gel to afford the target product.

### General procedure D for the organocatalytic racemic reactions

To a solution of the nitroolefin in DCE (0.2M), L-Proline (10 mol%) and D-Proline (10 mol%) were added at  $-20^\circ$ . The reaction was monitored by TLC and once gone to completion,  $\text{NaBH}_4$  (1.5 eq.) and MeOH were added. The reaction mixture was left stirring at  $-20^\circ$  until the reduction was completed. Then, a saturated aqueous solution of  $\text{NH}_4\text{Cl}$  was added, followed by brine and  $\text{H}_2\text{O}$ . The organic phase was extracted with  $\text{CH}_2\text{Cl}_2$ . The combined organic layers were dried ( $\text{Na}_2\text{SO}_4$ ), filtered and concentrated *in vacuo*. The crude product

was then purified by flash chromatography on silica gel (gradient 10-20% ethyl acetate in hexane).

### 1-(2-(nitromethyl)-1,3,2,3-cyclopentyl)ethan-1-one **13**

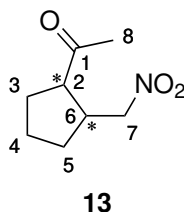

Following general procedure C, the nitroolefin **S6** (0.100 g, 0.58 mmol) was added to a mixture of catalyst **VI** (0.017 g, 0.12 mmol) in DCE (10.6 mL) at 0 °C. After 5 hours, the reaction did not show any formation of the product, therefore the reaction mixture was left stirring at rt. After 48 hours, the reaction was monitored by  $^1\text{H}$  NMR, showing only partial formation of the product. Acetic acid (20 mol%, 7  $\mu\text{L}$ ) was added as co-catalyst. After 8 days from start of the reaction, the reaction mixture was concentrated *in vacuo*. The crude product was purified *via* flash chromatography on silica gel (20% ethyl acetate in hexane) to afford separately *cis*- and *trans*-**13** as colourless oils (0.56 g, 56% yield of both diastereomers combined). *cis*-**13**: 84% *ee*;  $[\alpha]^{20}_D + 24.0$  ( $c = 0.1$ ,  $\text{CH}_2\text{Cl}_2$ ); IR (neat,  $\text{cm}^{-1}$ ) 2960, 1699, 1545, 1422, 1382, 1355, 1178;  $^1\text{H}$  NMR ( $\text{CDCl}_3$ , 400 MHz)  $\delta$  4.59 (2H, ABX,  $J_{AX} = 8.5$  Hz,  $J_{BX} = 6.9$  Hz,  $J_{AB} = 12.9$  Hz,  $\nu_{AB} = 92.1$  Hz, H-7), 3.23 (1H, ddd,  $J = 8.4, 7.1, 4.8$  Hz, H-2), 2.77 (1H, tq,  $J = 8.9, 7.3$  Hz, H-6), 2.22 (3H, s, H-8), 2.11 – 1.96 (1H, m, H-3), 1.96 – 1.76 (3H, m, H-5, H-3 and H-4), 1.76 – 1.62 (2H, m, H-5 and H-4).  $^{13}\text{C}$  NMR ( $\text{CDCl}_3$ , 101 MHz)  $\delta$  210.6 (C-1), 75.9 (C-7), 52.1 (C-2), 40.9 (C-6), 30.7 (C-8), 29.4 (C-3), 29.2 (C-5), 23.2 (C-4). HRMS required for  $\text{C}_8\text{H}_{14}\text{NO}_3$   $[\text{M}+\text{H}]^+$  172.0968, found 172.0972. HPLC analysis: Chiralpack OD, 2% isopropanol in hexane, flow rate = 0.8 mL/min,  $\lambda = 210$  nm. *trans*-**13**: 38% *ee*;  $[\alpha]^{20}_D + 2.0$  ( $c = 0.1$ ,  $\text{CH}_2\text{Cl}_2$ ); IR (neat,  $\text{cm}^{-1}$ ) 2960, 1705, 1545, 1431, 1371, 1356, 1174;  $^1\text{H}$  NMR ( $\text{CDCl}_3$ , 400 MHz)  $\delta$  4.31 (2H, ABX,  $J_{AX} = 6.8$  Hz,  $J_{BX} = 7.2$  Hz,  $J_{AB} = 12.1$  Hz,  $\nu_{AB} = 30.2$  Hz, H-7), 2.94 (1H, m, H-2), 2.79 – 2.61 (1H, m, H-6), 2.13 (3H, s, H-8),

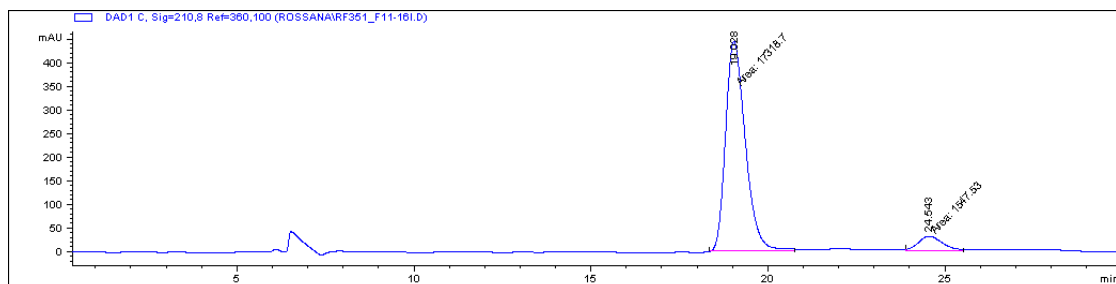

(a)

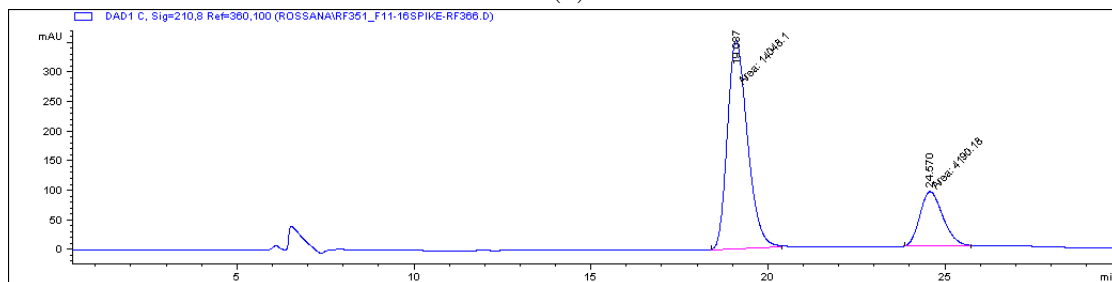

(b)

Figure S8: (a) chiral HPLC trace of *cis*-**13**. (b) Spike of *cis*-**13** with the racemic *cis*-**13**.

2.10 – 1.97 (1H, m, H-5), 1.97 – 1.85 (1H, m, H-3), 1.79 – 1.61 (3H, m, H-4 and H-5), 1.49 – 1.26 (2H, m, H-3).  $^{13}\text{C}$  NMR ( $\text{CDCl}_3$ , 101 MHz)  $\delta$  208.8 (C-1), 78.9 (c-7), 55.2 (C-6), 39.2 (C-2), 30.0 (C-8), 30.0 (C-5), 29.1 (C-3), 24.4 (C-4). HRMS required for  $\text{C}_8\text{H}_{14}\text{NO}_3$   $[\text{M}+\text{H}]^+$  172.0968, found 172.0972. HPLC analysis: Chiralpack AD-H, 0.5% isopropanol in hexane, flow rate = 0.5 mL/min,  $\lambda$  = 210 nm.

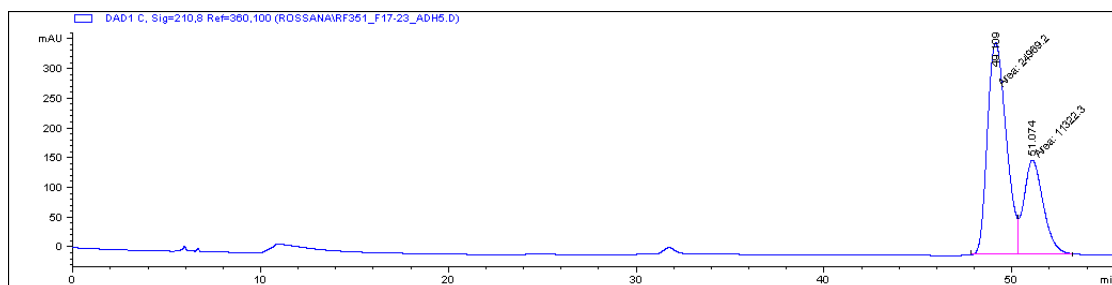

Figure S9: HPLC trace of *trans*-**13**.

(1-(nitromethyl)-1,3-dihydro-2H-1H,2H3-inden-2-yl)methanol **14**

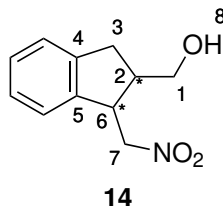

Following general procedure C, the nitroolefin **S12** (0.131 g, 0.64 mmol) was added to a solution of catalyst **VI** (0.019 g, 0.13 mmol) in DCE (12.8 mL). After 24 hours the reaction went to completion and it was reduced to the alcohol. The crude product was purified by flash chromatography on silica gel (25% ethyl acetate in hexane) to obtain a combination of *cis*- and *trans*-**14** as a colourless oil (0.97 g, 1:1 *cis/trans* ratio, 73% yield).

Mixture of diastereomers:  $[\alpha]^{20}_D$  - 16.0 ( $c = 0.1$ ,  $\text{CH}_2\text{Cl}_2$ ) IR (neat,  $\text{cm}^{-1}$ ) 3569, 3366, 2922, 1543, 1479, 1459, 1430, 1377, 1198, 1020, 752, 668; *cis*-**14**: 90% *ee*;  $^1\text{H}$  NMR ( $\text{CDCl}_3$ , 400 MHz)  $\delta$  7.34 – 7.09 (4H, m, Ar-H), 4.71 (2H, ABX,  $J_{AX} = 7.5$  Hz,  $J_{BX} = 7.8$  Hz,  $J_{AB} = 13.2$  Hz,  $\nu_{AB} = 128.3$  Hz, H-7), 4.14 (1H, q,  $J = 7.5$  Hz, H-6), 3.94 – 3.73 (2H, m, H-1), 3.10 – 2.90 (2H, m, H-2 and H-3), 2.83 (1H, dd,  $J = 14.8, 7.2$  Hz, H-3).  $^{13}\text{C}$  NMR ( $\text{CDCl}_3$ , 101 MHz)  $\delta$  142.3 (C-5), 141.4 (C-4), 128.0 (Ar-C), 127.0 (Ar-C), 125.0 (Ar-C), 124.0 (Ar-C), 76.0 (C-7), 62.6 (C-1), 44.5 (C-6), 44.3 (C-2), 33.9 (C-3). HPLC analysis: Chiralpack AD-H, 5% isopropanol in hexane, flow rate = 0.6 mL/min,  $\lambda = 210$  nm. *trans*-**14**: 52% *ee*;  $^1\text{H}$  NMR ( $\text{CDCl}_3$ , 400 MHz)  $\delta$  7.26 – 7.04 (4H, m, Ar-H), 4.65 – 4.42 (2H, m, H-7), 3.80 (1H, td,  $J = 7.0, 4.7$  Hz, H-6), 3.70 – 3.49 (2H, m, H-1), 2.91 (2H, ABX,  $J_{AX} = 8.4$  Hz,  $J_{BX} = 5.0$  Hz,  $J_{AB} = 16.5$  Hz,  $\nu_{AB} = 19.4$  Hz, H-3), 2.57 – 2.38 (1H, m, H-2).  $^{13}\text{C}$  NMR ( $\text{CDCl}_3$ , 101 MHz)  $\delta$  142.3 (C-5), 140.4 (C-4), 128.2 (Ar-C), 127.1 (Ar-C), 125.3 (Ar-C), 124.3 (Ar-C), 79.2 (C-7), 65.3 (C-1), 46.3 (C-6), 45.0 (C-2), 34.0 (C-3). HRMS required for  $\text{C}_{11}\text{H}_{12}\text{NO}_3$   $[\text{M}-\text{H}]^-$  206.0812, 206.0816. HPLC analysis: Chiralpack AD-H, 5% isopropanol in hexane, flow rate = 0.6 mL/min,  $\lambda = 210$  nm.

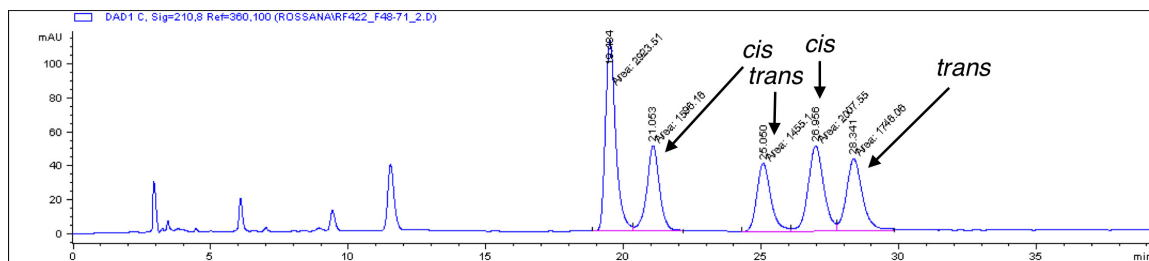

(a)

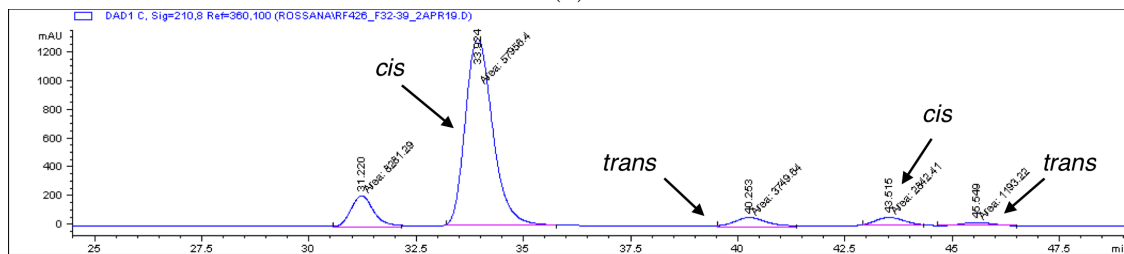

(b)

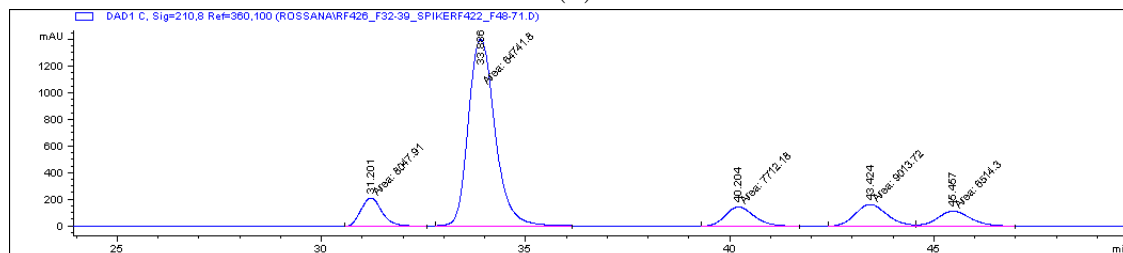

(c)

Figure S10: (a) Chiral HPLC trace of a racemic mixture of both diastereomers *cis* and *trans* **14**. (b) Chiral HPLC trace of **14**. (c) Chiral HPLC trace of spike of enantioselective **14** with racemic **14**.

## Enantioselective study

In order to gain a better understanding of the mechanism of the reaction, an enantioselective study was performed (Table S11). The reaction was carried out under the same reaction

Table S11: Enantioselective study of 5-*exo-trig* cyclisation.

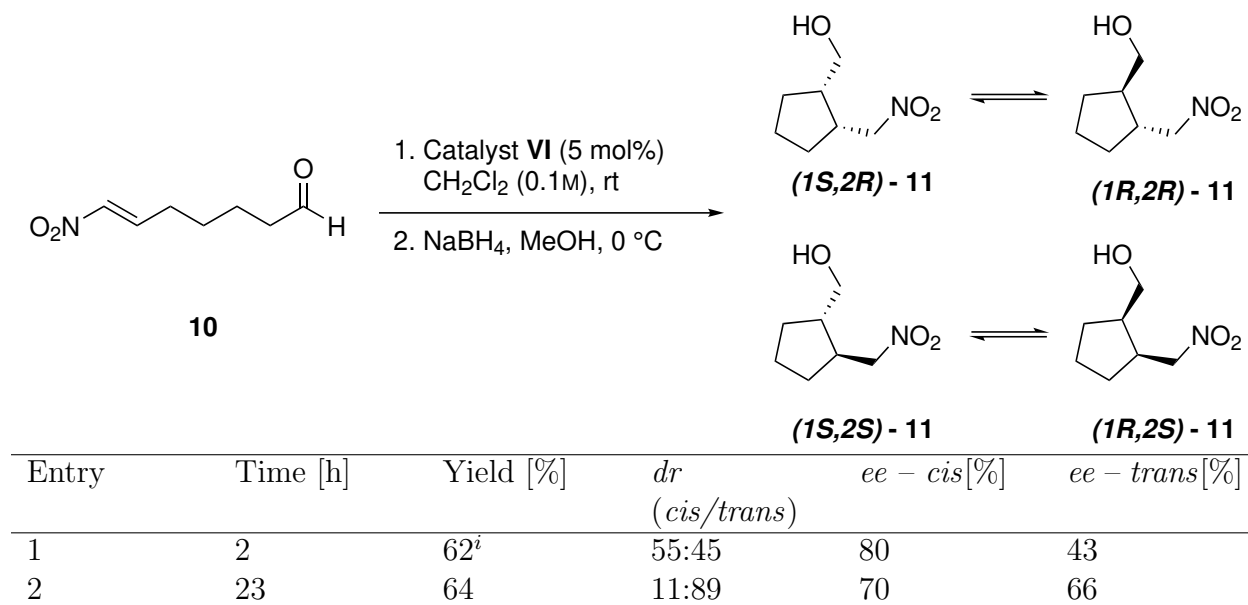

conditions used for the NMR kinetic study at rt in CH<sub>2</sub>Cl<sub>2</sub> (0.1M) and in the presence of 5 mol% of the catalyst (Table S11). After 2 hours, 14 mL out of 28.7 mL of the reaction mixture were transferred in a separate flask and the reaction was reduced *in situ* with NaBH<sub>4</sub> at 0 °C to afford **11** in 62% yield, 1:1 *dr*, 80% *ee* for the diastereomer *cis* and 44% *ee* for the diastereomer *trans*. The rest of the reaction mixture was left stirring at rt for 23 hours and then reduced *in situ* to achieve **11** in 64% yield. Diastereoselectivity degradation to 1:9 *dr* in favour of the *trans* was then observed. Enantioselectivity diminished to 70% *ee* for the *cis*-**11** and raised to 66% *ee* for the *trans*-**11**.

## Synthesis of $\gamma/\alpha$ -peptides

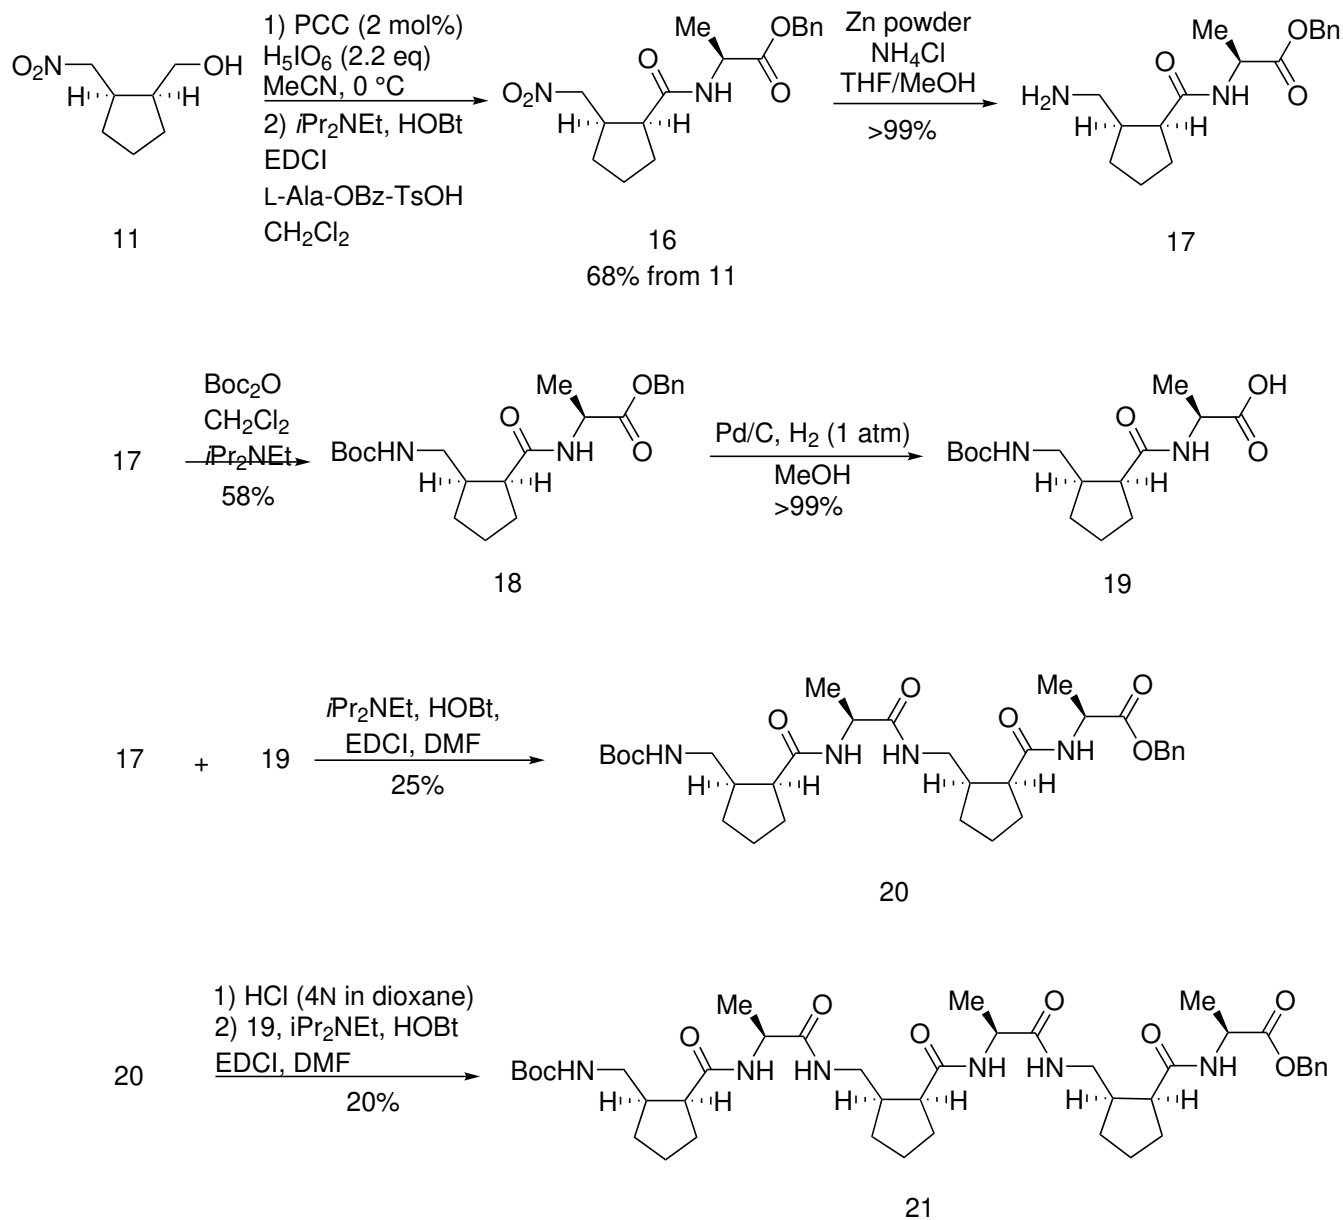

Scheme S3: Synthetic procedure for the synthesis of  $\gamma/\alpha$ -peptides **18**, **20** and **21**.

**(1*S*,2*R*)-2-(nitromethyl)cyclopentane-1-carboxylic acid **S13****

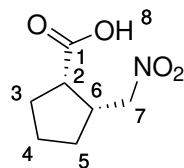

**S13**

To a solution of  $\text{H}_5\text{IO}_6$  (2.198 g, 9.7 mmol) in anhydrous acetonitrile (19 mL) stirred vigorously for 15 minutes at room temperature was added **cis-11** (0.699 g, 4.4 mmol) at 0 °C in anhydrous acetonitrile (2 mL) followed by PCC (0.019 g, 0.09 mmol) in acetonitrile (4 mL). The reaction mixture was stirred at 0 °C for 45 minutes until the reaction went to completion. The reaction was monitored by TLC. Ethyl acetate (50 mL) was then added and the organic phase was washed first with brine (50 mL), then with a saturated aqueous solution of  $\text{NaHSO}_3$  (70 mL) and brine (50 mL) again. The organic layers were then combined and dried on  $\text{Na}_2\text{SO}_4$ , filtered and concentrated *in vacuo*. The product obtained was a colourless oil (0.674 g, 3.9 mmol, 88%) and it was pure enough to carry on with the next step.  $[\alpha]^{20}_D +21.0$  ( $c = 0.1$ ,  $\text{CH}_2\text{Cl}_2$ ); IR (neat,  $\text{cm}^{-1}$ ) 2963, 1701, 1547, 1383;  $^1\text{H}$  NMR (400 MHz,  $\text{CDCl}_3$ )  $\delta$  4.56 (2H, ABX,  $J_{AX} = 7.2$  Hz,  $J_{BX} = 8.1$  Hz,  $J_{AB} = 13.2$  Hz,  $\nu_{AB} = 99.0$  Hz, H-7), 3.07 (1 H, td,  $J$  7.4, 6.1, H-2), 2.90 (1 H, dt,  $J$  9.3, 7.5, H-6), 2.12 – 1.99 (2 H, m, H-3), 2.00 – 1.84 (2 H, m, H-4', H-5'), 1.82 – 1.67 (1 H, m, H-4''), 1.67 – 1.50 (1 H, m, H-5'').  $^{13}\text{C}$  NMR (101 MHz,  $\text{CDCl}_3$ )  $\delta$  179.6 (C-1), 76.1 (C-7), 45.2 (C-2), 40.4 (C-6), 29.1 (C-3), 28.9 (C-5), 23.0 (C-4); HRMS required for  $\text{C}_7\text{H}_{10}\text{NO}_4$   $[\text{M}-\text{H}]^-$  is 172.0610, found 172.0612.

**Benzyl((1*S*,2*R*)-2-(nitromethyl)cyclopentane-1-carbonyl)-d-alaninate **S14****

To a solution of the carboxylic acid **S13** (0.087 g, 0.5 mmol) in  $\text{CH}_2\text{Cl}_2$  (3.4 mL), DIPEA (0.1 mL, 0.6 mmol), HOBT· $\text{H}_2\text{O}$  (0.081 g, 0.6 mmol) and EDCI (0.115 g, 0.6 mmol) were added and the reaction mixture was stirred for 15 minutes at rt. D-Ala benzyl ester (0.090 g, 0.5 mmol) was then added and the reaction mixture was left stirring at rt for 16 hours.



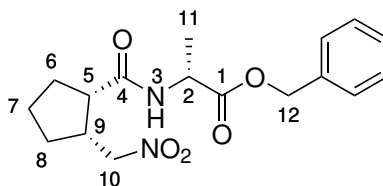

**S14**

The reaction was monitored by TLC and after 24 hours ethyl acetate (50 mL) was added. The organic phase was washed first with an aqueous 1N solution of aqueous HCl (75 mL), then with an aqueous saturated solution of NaHCO<sub>3</sub> (25 mL) and finally with brine (25 mL). The acidic aqueous phase was then extracted again with CH<sub>2</sub>Cl<sub>2</sub> (2 x 25 mL) and the same procedure was carried out for the basic phase (NaHCO<sub>3</sub> and brine phases combined) too. The organic phase was then dried over Na<sub>2</sub>SO<sub>4</sub>, filtered and concentrated *in vacuo*. The crude product was purified *via* combiflash on 80g silica gel columns (gradient ethyl acetate in hexane). The product was obtained as a white solid (0.056 g, 34%). mp = 48.8 - 50.4 °C; IR (neat, cm<sup>-1</sup>) 3315, 2932, 1733, 1638, 1538, 1450, 1385, 1334, 1316, 1207, 1144, 958, 757, 731; <sup>1</sup>H NMR (400 MHz, CDCl<sub>3</sub>) δ 7.36 – 7.23 (5 H, m, Ar-H), 6.10 (1 H, d, *J* = 7.4 Hz, H-3), 5.10 (2 H, ABq, *J*<sub>AB</sub> = 12.3 Hz, H-12), 4.58 – 4.31 (3 H, ABX unresolved, m, H-10 and H-2), 2.84 – 2.66 (2 H, m, H-5 and H-9), 1.94 - 1.78 (2 H, m, H-8 and H-7'), 1.81 - 1.70 (1 H, m, H-6'), 1.62 – 1.48 (2 H, m, H-7'' and H-6''), 1.32 (3 H, d, *J* = 7.2 Hz, H-11); <sup>13</sup>C NMR (101 MHz, CDCl<sub>3</sub>) δ 173.2 (C-4), 172.8 (C-1), 135.3 (Ar-C), 128.6 (Ar-C), 128.5 (Ar-C), 128.2 (Ar-C), 76.3 (C-10), 67.2 (C-12), 48.1 (C-2), 46.7 (C-5), 41.1 (C-9), 29.9 (C-8), 29.7 (C-6), 24.0 (C-7), 18.2 (C-11). HRMS required for C<sub>17</sub>H<sub>23</sub>N<sub>2</sub>O<sub>5</sub> [M+H]<sup>+</sup> is 335.1607, found 335.1600.

**Benzyl ((1*S*,2*R*)-2-(nitromethyl)cyclopentane-1-carbonyl)- l-alaninate **16****

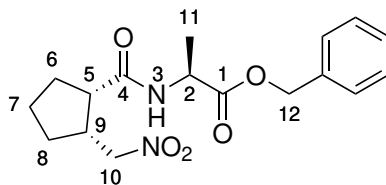

**16**

To a solution of the carboxylic acid **S13** (0.660 g, 3.8 mmol) in CH<sub>2</sub>Cl<sub>2</sub> (27 mL), DIPEA (0.80 mL, 4.6 mmol), HOBt· H<sub>2</sub>O (0.622 g, 4.6 mmol) and EDCI (0.882 g, 4.6 mmol) were added and the reaction mixture was stirred for 15 minutes at rt. L-Ala benzyl ester *p*-toluene sulfonate salt was then added and the reaction mixture was left stirring at rt for 16 hours. The reaction was monitored by TLC and once gone to completion ethyl acetate (150 mL) was added. The organic phase was washed first with an aqueous 1N solution of NaHSO<sub>4</sub> (75 mL), then with an aqueous saturated solution of NaHCO<sub>3</sub> (75 mL) and finally with brine (75 mL). The acidic aqueous phase was then extracted again with CH<sub>2</sub>Cl<sub>2</sub> (2 x 75 mL) and the same procedure was carried out for the basic phase (NaHCO<sub>3</sub> and brine phases combined) too. The organic phase was then dried over Na<sub>2</sub>SO<sub>4</sub>, filtered and concentrated *in vacuo*. The crude product was purified *via* combiflash on 80g silica gel columns (gradient ethyl acetate in hexane). The product was obtained as a white solid (0.399 g, 1.2 mmol, 31%). mp = 94.2 - 97.1 °C;  $[\alpha]_D^{20}$  +15.0 (*c* = 0.1, CH<sub>2</sub>Cl<sub>2</sub>); IR (neat, cm<sup>-1</sup>) 3316, 2959, 1744, 1640, 1550, 1527, 1456, 1389, 1376, 1188, 1168, 1153; <sup>1</sup>H NMR (400 MHz, CDCl<sub>3</sub>) δ 7.46 – 7.32 (3 H, m, Ar-H), 6.14 (1 H, d, *J* 7.3, H-3), 5.19 (2H, AB, *J*<sub>AB</sub> = 12.2 Hz, *ν*<sub>AB</sub> = 27.9 Hz, H-12), 4.55 (2H, ABX, *J*<sub>AX</sub> = 8.2 Hz, *J*<sub>BX</sub> = 6.6 Hz, *J*<sub>AB</sub> = 13.5 Hz, *ν*<sub>AB</sub> = 119.4 Hz, H-10), 4.56 (1 H, p, *J* 7.2, H-2), 2.91 (1 H, td, *J* 7.7, 4.8, H-5), 2.87 – 2.71 (1 H, m, H-9), 2.10 – 1.89 (3 H, m, H-6, H-7'), 1.91 – 1.74 (1 H, m, H-8'), 1.74 – 1.58 (2 H, m, H-8'', H-7''), 1.43 (3 H, d, *J* 7.2, H-11). <sup>13</sup>C NMR (101 MHz, CDCl<sub>3</sub>) δ 173.4 (C-4), 172.8 (C-1), 135.4 (Ar-C), 128.8 (Ar-C), 128.6 (Ar-C), 128.4 (Ar-C), 76.5 (C-10), 67.4 (C-12), 48.3 (C-2), 46.9 (C-5), 41.9 (C-9), 29.7 (C-8), 29.5 (C-6), 23.8 (C-7), 18.0 (C-11); HRMS required for C<sub>17</sub>H<sub>23</sub>N<sub>2</sub>O<sub>5</sub>

$[M+H]^+$  is 335.1607, found 335.1596.

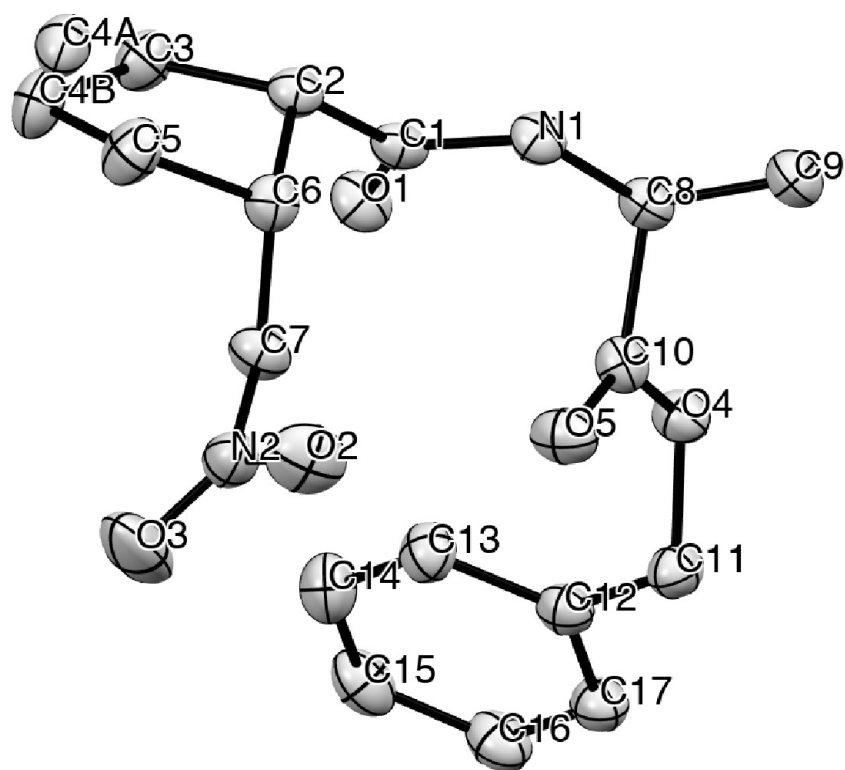

Figure S11: Crystal structure of the nitrodimer **16**.

Table S12: Crystal data and structure refinement for the nitrodimer **16**

|                                                |                                                               |
|------------------------------------------------|---------------------------------------------------------------|
| Identification code                            | RF435-F32-34                                                  |
| Empirical formula                              | C <sub>17</sub> H <sub>22</sub> N <sub>2</sub> O <sub>5</sub> |
| Formula weight                                 | 334.36                                                        |
| Temperature/K                                  | 149.95(10)                                                    |
| Crystal system                                 | monoclinic                                                    |
| Space group                                    | P2 <sub>1</sub>                                               |
| a/Å                                            | 9.4637(2)                                                     |
| b/Å                                            | 9.36340(10)                                                   |
| c/Å                                            | 9.9797(2)                                                     |
| $\alpha/^\circ$                                | 90                                                            |
| $\beta/^\circ$                                 | 109.791(2)                                                    |
| $\gamma/^\circ$                                | 90                                                            |
| Volume/Å <sup>3</sup>                          | 832.09(3)                                                     |
| Z                                              | 2                                                             |
| $\rho_{calc}$ /g/cm <sup>3</sup>               | 1.335                                                         |
| $\mu$ /mm <sup>-1</sup>                        | 0.819                                                         |
| F(000)                                         | 356.0                                                         |
| Crystal size/mm <sup>3</sup>                   | 0.26 × 0.05 × 0.02                                            |
| Radiation                                      | CuK $\alpha$ ( $\lambda$ = 1.54184)                           |
| 2 $\Theta$ range for data collection/ $^\circ$ | 9.418 to 140.84                                               |
| Index ranges                                   | -11 ≤ h ≤ 11, -11 ≤ k ≤ 11, -12 ≤ l ≤ 12                      |
| Reflections collected                          | 15121                                                         |
| Independent reflections                        | 3114 [ $R_{int}$ = 0.0432, $R_{sigma}$ = 0.0291]              |
| Data/restraints/parameters                     | 3114/1/232                                                    |
| Goodness-of-fit on F <sup>2</sup>              | 1.046                                                         |
| Final R indexes [ $I_c=2\sigma$ (I)]           | $R_1$ = 0.0327, $wR_2$ = 0.0838                               |
| Final R indexes [all data]                     | $R_1$ = 0.0342, $wR_2$ = 0.0856                               |
| Largest diff. peak/hole / e Å <sup>-3</sup>    | 0.17/-0.18                                                    |
| Flack parameter                                | 0.03(10)                                                      |

**Benzyl ((1*S*,2*R*)-2-(((tert-butoxycarbonyl)amino)methyl)cyclopentane-1-carbonyl)-  
l-alaninate **18****

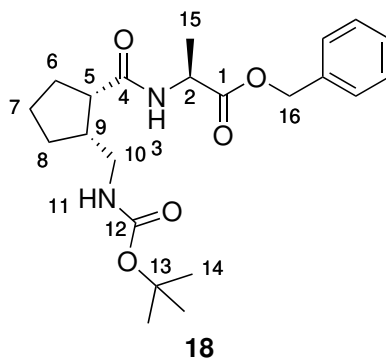

To a solution of compound **16** (0.556 g, 1.7 mmol) in anhydrous MeOH (33 mL) and anhydrous THF (33 mL), Zn powder (1.637 g, 24.9 mmol) and NH<sub>4</sub>Cl (1.332 g, 24.9 mmol) were added. The reaction mixture was stirred at rt for 1 hour and it was worked up after monitoring it *via* TLC. Ethyl acetate (500 mL) was added and it was then filtered through a short pad of celite. The white solid obtained was then dissolved in CH<sub>2</sub>Cl<sub>2</sub> and filtered through cotton wool to remove any NH<sub>4</sub>Cl left in solution. The product **17** obtained was a pale yellow paste (0.572 g, 1.8 mmol, quantitative yield) and it was pure enough to carry on the next step without any further purification. To a solution of the free amine **17** (0.552 g, 1.81 mmol) in anhydrous CH<sub>2</sub>Cl<sub>2</sub> (14 mL), isopropyl amine (0.63 mL, 3.6 mmol) and Boc<sub>2</sub>O (0.64 mol, 2.7 mmol) were added and the reaction mixture was stirred at rt. The reaction was monitored by TLC and it went to completion in 45 minutes. The reaction mixture was diluted with ethyl acetate (45 mL) and washed with an aqueous solution of 1M NaHSO<sub>4</sub> (30 mL) followed by brine (30 mL). The organic layers were then combined, dried over Na<sub>2</sub>SO<sub>4</sub>, filtered and concentrated *in vacuo*. The crude product was then purified *via* flash chromatography on silica gel (30% ethyl acetate in hexane). The titled product was obtained as a white solid (0.270 g, 0.7 mmol, 36%). mp = 131.3 - 133.9 °C;  $[\alpha]^{20}_D +103.8$  (c = 0.08, MeOH); IR (neat, cm<sup>-1</sup>) 3350, 3322, 2958, 1739, 1676, 1640, 1533, 1454, 1370, 1281, 1152, 1058; <sup>1</sup>H NMR (400 MHz, CDCl<sub>3</sub>) δ 7.36 – 7.21 (5 H, m, Ar-H), 6.16 (1 H, d,

$J$  6.7, H-3), 5.39 (1 H, t  $J$  6.2, H-11)), 5.19 (1 H, ABq,  $J_{AB} = 12.3$  Hz,  $\nu_{AB} = 30.5$ , H-16), 4.60 (1 H, p,  $J$  7.3, H-2), 3.19 (1 H, dt,  $J$  13.9, 5.9, H-10'), 3.11 - 2.91 (1 H, m, H-10''), 2.73 - 2.60 (1 H, m, H-5), 2.48 - 2.29 (1 H, m, H-9), 2.00 - 1.79 (3 H, m, H-6, H-7'), 1.79 - 1.69 (1 H, m, H-8'), 1.60 - 1.48 (2H, m H-7'' and H-8''), 1.44 (9H, s, H-14), 1.41 (3H, m, H-15);  $^{13}\text{C}$  NMR (101 MHz,  $\text{CDCl}_3$ )  $\delta$  174.6 (C-4), 173.4 (C-1), 156.4 (C-12), 135.3 (Ar-C), 128.7 (Ar-C), 128.5 (Ar-C), 128.3 (Ar-C), 67.3 (C-16), 48.0 (C-2), 47.4 (C-5), 44.2 (C-9), 41.8 (C-10), 29.7 (C-8), 29.2 (C-6), 28.5 (C-14), 24.1(C-7), 18.0 (C-15); HRMS required for  $\text{C}_{22}\text{H}_{33}\text{N}_2\text{O}_5$   $[\text{M}+\text{H}]^+$  is 405.2389, found 405.2399.

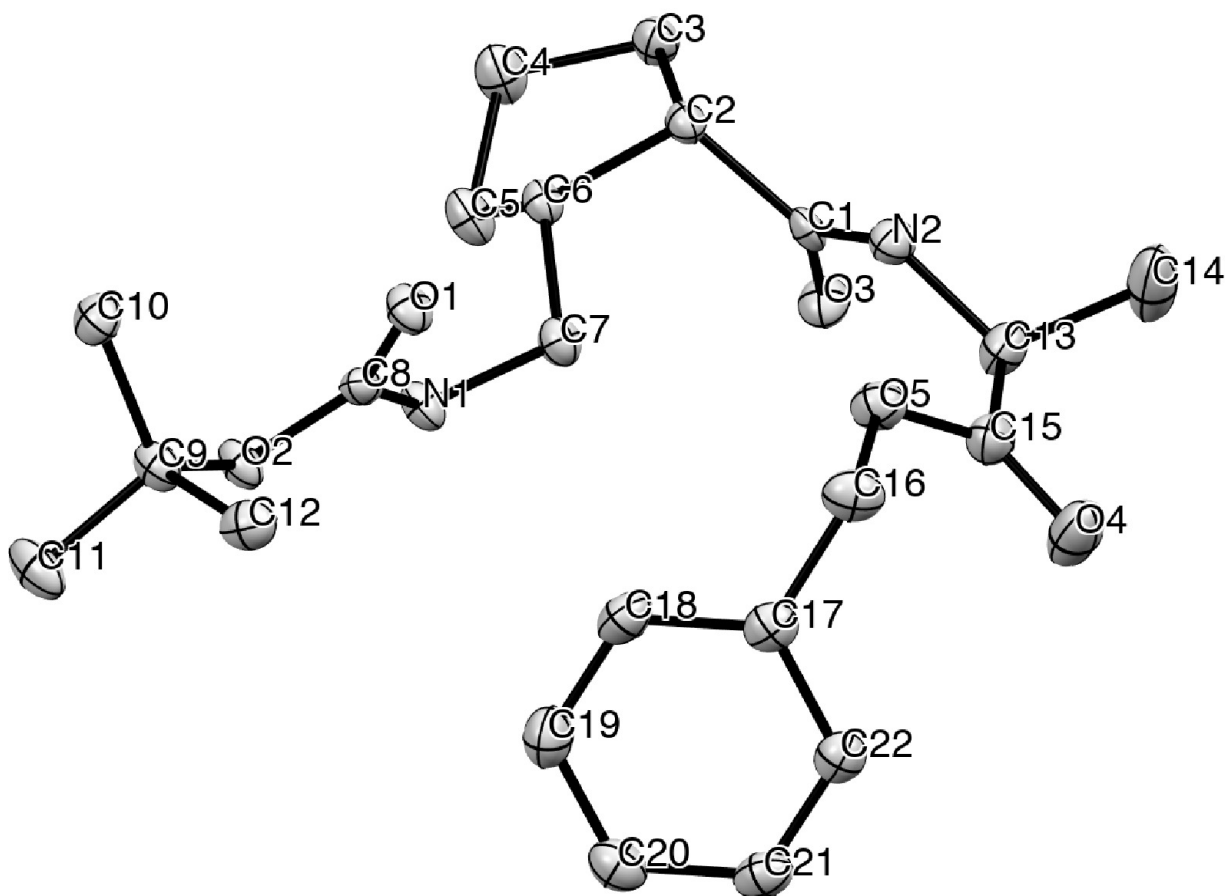

Figure S12: X-Ray crystal structure of the dimer **18**.

Table S13: Crystal data and structure refinement for exp13.

|                                                |                                                               |
|------------------------------------------------|---------------------------------------------------------------|
| Identification code                            | exp <sub>13</sub>                                             |
| Empirical formula                              | C <sub>22</sub> H <sub>32</sub> N <sub>2</sub> O <sub>5</sub> |
| Formula weight                                 | 404.49                                                        |
| Temperature/K                                  | 100.00(10)                                                    |
| Crystal system                                 | monoclinic                                                    |
| Space group                                    | P2 <sub>1</sub>                                               |
| a/Å                                            | 5.03210(10)                                                   |
| b/Å                                            | 18.5414(4)                                                    |
| c/Å                                            | 11.6101(2)                                                    |
| $\alpha/^\circ$                                | 90                                                            |
| $\beta/^\circ$                                 | 94.440(2)                                                     |
| $\gamma/^\circ$                                | 90                                                            |
| Volume/Å <sup>3</sup>                          | 1080.00(4)                                                    |
| Z                                              | 2                                                             |
| $\rho_{calc}/\text{cm}^3$                      | 1.244                                                         |
| $\mu/\text{mm}^{-1}$                           | 0.716                                                         |
| F(000)                                         | 436.0                                                         |
| Crystal size/mm <sup>3</sup>                   | 0.14 × 0.03 × 0.03                                            |
| Radiation                                      | CuK $\alpha$ ( $\lambda = 1.54184$ )                          |
| 2 $\Theta$ range for data collection/ $^\circ$ | 7.638 to 134.094                                              |
| Index ranges                                   | -5 ≤ h ≤ 4, -22 ≤ k ≤ 22, -13 ≤ l ≤ 13                        |
| Reflections collected                          | 16639                                                         |
| Independent reflections                        | 3822 [ $R_{int} = 0.0575$ , $R_{sigma} = 0.0462$ ]            |
| Data/restraints/parameters                     | 3822/1/266                                                    |
| Goodness-of-fit on F <sub>2</sub>              | 1.068                                                         |
| Final R indexes [ $I \geq 2\sigma(I)$ ]        | $R_1 = 0.0343$ , $wR_2 = 0.0828$                              |
| Final R indexes [all data]                     | $R_1 = 0.0383$ , $wR_2 = 0.0848$                              |
| Largest diff. peak/hole / e Å <sup>-3</sup>    | 0.20/ − 0.17                                                  |
| Flack parameter                                | 0.02(11)                                                      |

## General procedure E for deprotection of the acid moiety

To a solution of benzyl ester in MeOH (20 mL/mmol), a spatula tip of Pd/C (10 %w/w) is added followed by 3 H<sub>2</sub> balloons that were emptied in the reaction mixture. The reaction is monitored by <sup>1</sup>H NMR and TLC. The reaction mixture was then filtered through a short pad of celite with a short pad of silica on top and it was washed with MeOH (50 mL). The organic phase was then concentrated *in vacuo*. The titled product is obtained pure and did not need any further purification.

## General procedure F for deprotection of the amine moiety

To a solution of protected amine dissolved in a minimal amount of 1,4-dioxane, a solution of 4N HCl in 1,4-dioxane (5 mL/0.5 mmol) was added. The reaction flask is then sealed with a septum and stirred at rt. The reaction is monitored by <sup>1</sup>H NMR and TLC and after 4.5 hours the reaction mixture is then concentrated *in vacuo* to give pure free amine ready to be used for the following step.

### $\gamma/\alpha$ -peptide BocNH(AMCP-L-Ala)<sub>2</sub>-OBn **20**

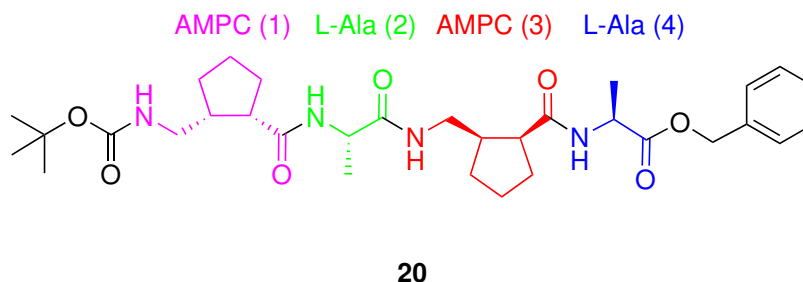

To a solution of compound **19** (0.063 g, 0.2 mmol) in DMF (0.5 mL), DIPEA (0.2 mL, 1.2 mmol), HOBt·H<sub>2</sub>O (0.032 g, 0.24 mmol) and EDCI (0.046 g, 0.24 mmol) were added. The solution was stirred at rt for 15 minutes and then a solution of compound **17** (0.061 g, 0.2 mmol) in DMF (0.5 mL) was added. The reaction mixture was stirred at rt for 24 hours. Ethyl acetate (10 mL) was then added and the organic phase was washed with a 1M aqueous



solution of NaHSO<sub>4</sub> (2 x 5 mL), a saturated aqueous solution of NaHCO<sub>3</sub> (2 x 5 mL) and then brine (2 x 5 mL). Acid and basic aqueous layers were then extracted twice with CH<sub>2</sub>Cl<sub>2</sub>. All organic layers were combined, dried over Na<sub>2</sub>SO<sub>4</sub>, filtered and concentrate *in vacuo*. The crude product was then purified by flash chromatography on silica gel (gradient hexane/ethyl acetate/methanol) to obtain the titled product **20** as a white solid (0.031 g, 0.05 mmol, 26%).  $[\alpha]^{20}_D +69.2$  (c = 0.12, MeOH). IR (neat, cm<sup>-1</sup>) 3300, 2931, 1741, 1636, 1534, 1449, 1366, 1278, 1247, 1169, 1114, 1034 . <sup>1</sup>H NMR (600 MHz, CDCl<sub>3</sub>)  $\delta$  8.31 (1 H, m), 8.11 (1 H, d, *J* 7.0), 7.44 – 7.27 (5 H, m), 6.11 (1 H, d, *J* 4.9), 6.08 (1 H, d, *J* 6.7), 5.26 (1 H, d, *J* 12.3), 5.20 (1 H, dd, *J* 39.7, 12.3), 4.52 (1 H, t, *J* 7.3), 4.18 (1 H, q, *J* 6.9), 3.62 (1 H, ddd, *J* 13.4, 6.1, 4.7), 3.33 (1 H, dd, *J* 13.1, 6.3), 2.91 – 2.81 (2 H, m), 2.82 – 2.65 (3 H, m), 2.59 – 2.49 (1 H, m), 1.99 – 1.80 (6 H, m), 1.81 – 1.72 (2 H, m), 1.60 (9 H, s), 1.60-1.54 (2H, m) 1.47 - 1.43 (4 H, m), 1.42 (m, 1H), 1.41 (3 H, d, *J* 7.0). <sup>13</sup>C NMR (101 MHz, CDCl<sub>3</sub>)  $\delta$  176.5 (CO AMCP(3)), 176.0 (CO L-Ala(4)), 175.7 (CO L-Ala(2)), 173.3 (CO AMCP(1)), 156.5 (CO-Boc), 135.2 (C-Ar), 128.6 (C-Ar), 128.4 (C-Ar), 128.1 (C-Ar), 67.4 (CH<sub>2</sub>-Bn), 50.0 (HC $\alpha$  L-Ala(2)), 48.2 (HC $\alpha$  L-Ala(4)), 46.6 (HC $\alpha$  AMCP(1)), 45.3(HC $\alpha$  AMCP(3)), 44.3 (HC $\beta$  AMCP(1)), 42.0 (H2C $\gamma$  AMCP(1)), 41.9 (HC $\gamma$  AMCP(1), 30.8 (C1 AMCP(3)), 30.3, 30.1 (C1-AMCP(1)), 30.0 (C3-AMCP(3)), 29.7 (C3-AMCP(1)), 25.6 (C2 AMCP(3)), 24.5 (C2 AMCP(1)), 17.6 (HC $\beta$  L-Ala(2)), 16.8 (HC $\beta$  L-Ala(4)). HRMS required for C<sub>32</sub>H<sub>49</sub>N<sub>4</sub>O<sub>7</sub> [M+H]<sup>+</sup> is 601.3601, found 601.3604.

Table S14:  $^1\text{H}$  NMR assignments for the  $\gamma/\alpha$ -peptide **20**.

| Residue     | H $\alpha$ | H $\beta$ | H $\gamma$ 1 | H $\gamma$ 2 | NH   | H1                  | H2                  | H3                  |
|-------------|------------|-----------|--------------|--------------|------|---------------------|---------------------|---------------------|
| L-Ala(2)    | 4.19       | 1.41      | -            | -            | 6.08 | -                   | -                   | -                   |
| AMCP<br>(3) | 2.71       | 2.87      | 3.62         | 2.79         | 8.31 | 1.75<br>and<br>1.42 | 1.88<br>and<br>1.58 | 1.93<br>and<br>1.86 |
| L-Ala(4)    | 4.52       | 1.45      | -            | -            | 8.11 | -                   | -                   | -                   |
| AMCP<br>(1) | 2.73       | 2.54      | 3.33         | 2.69         | 6.10 | 1.77<br>and<br>1.40 | 1.88<br>and<br>1.57 | 1.93<br>and<br>1.86 |

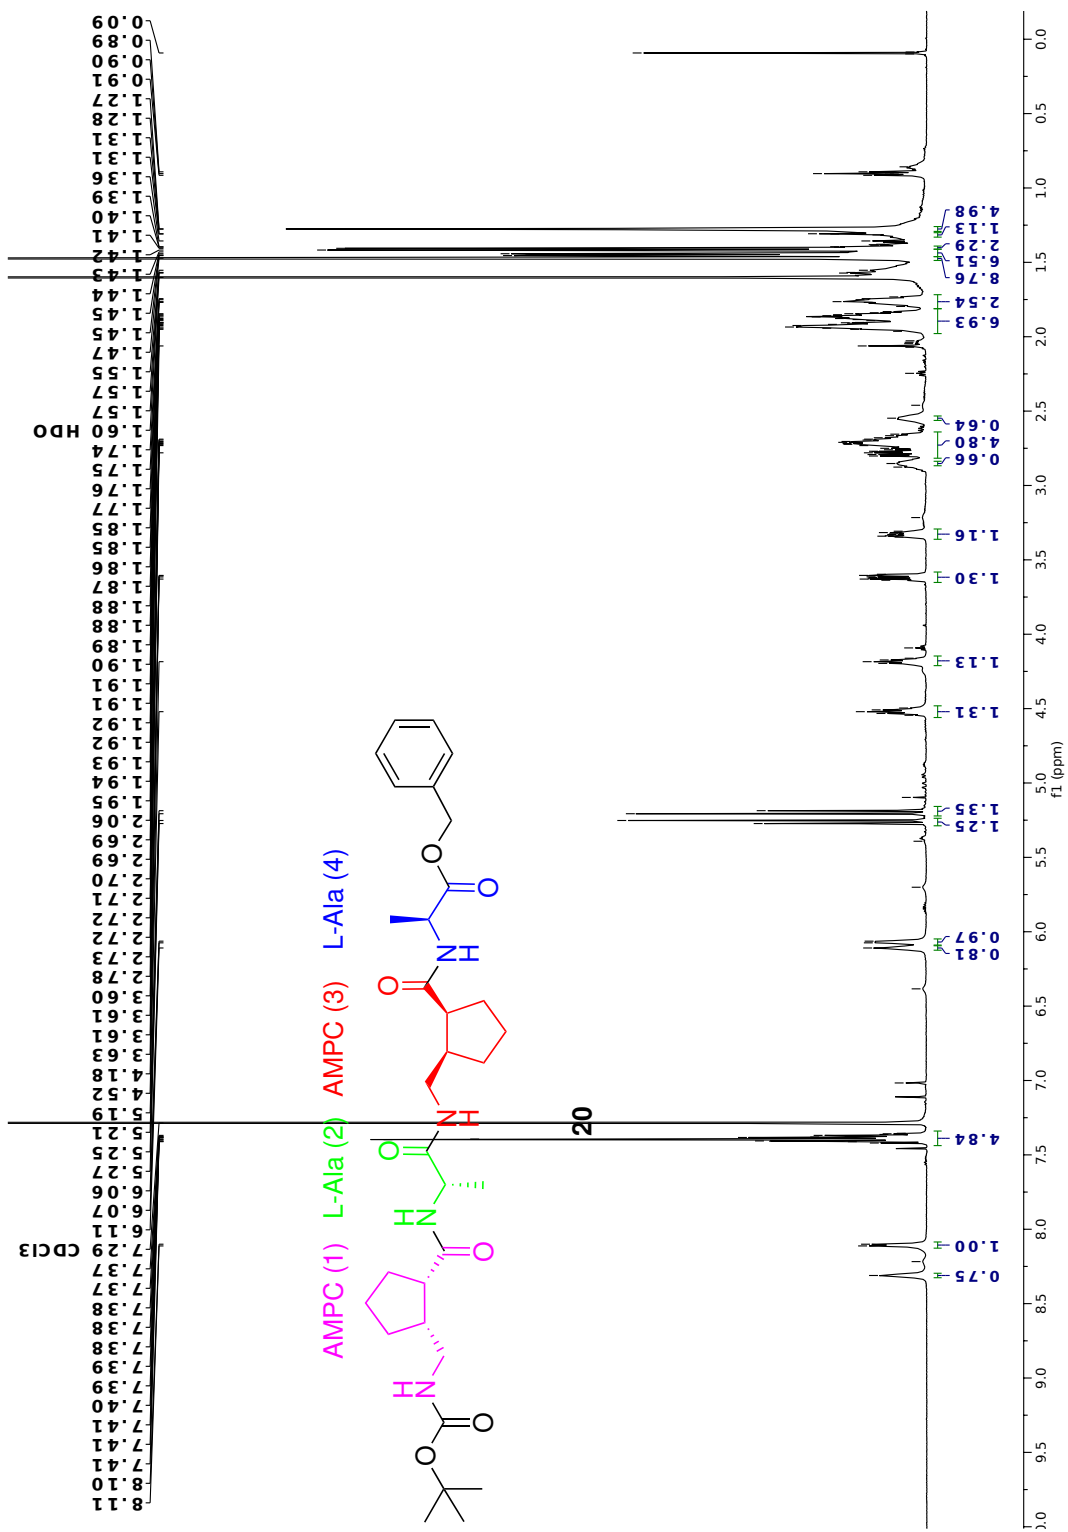

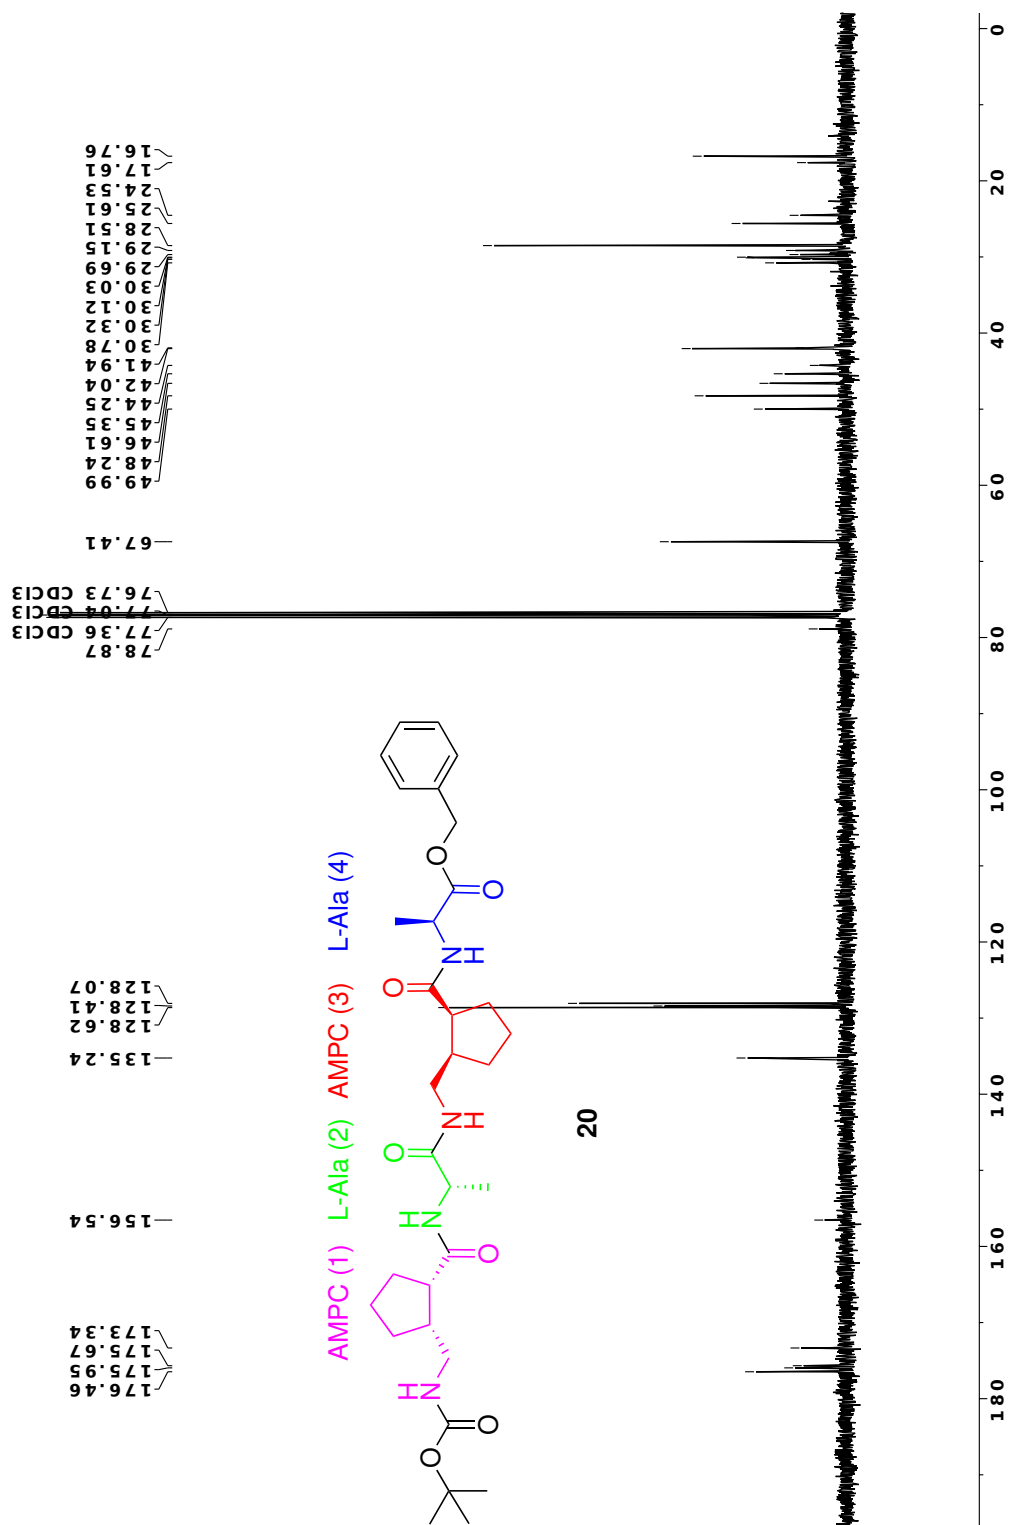

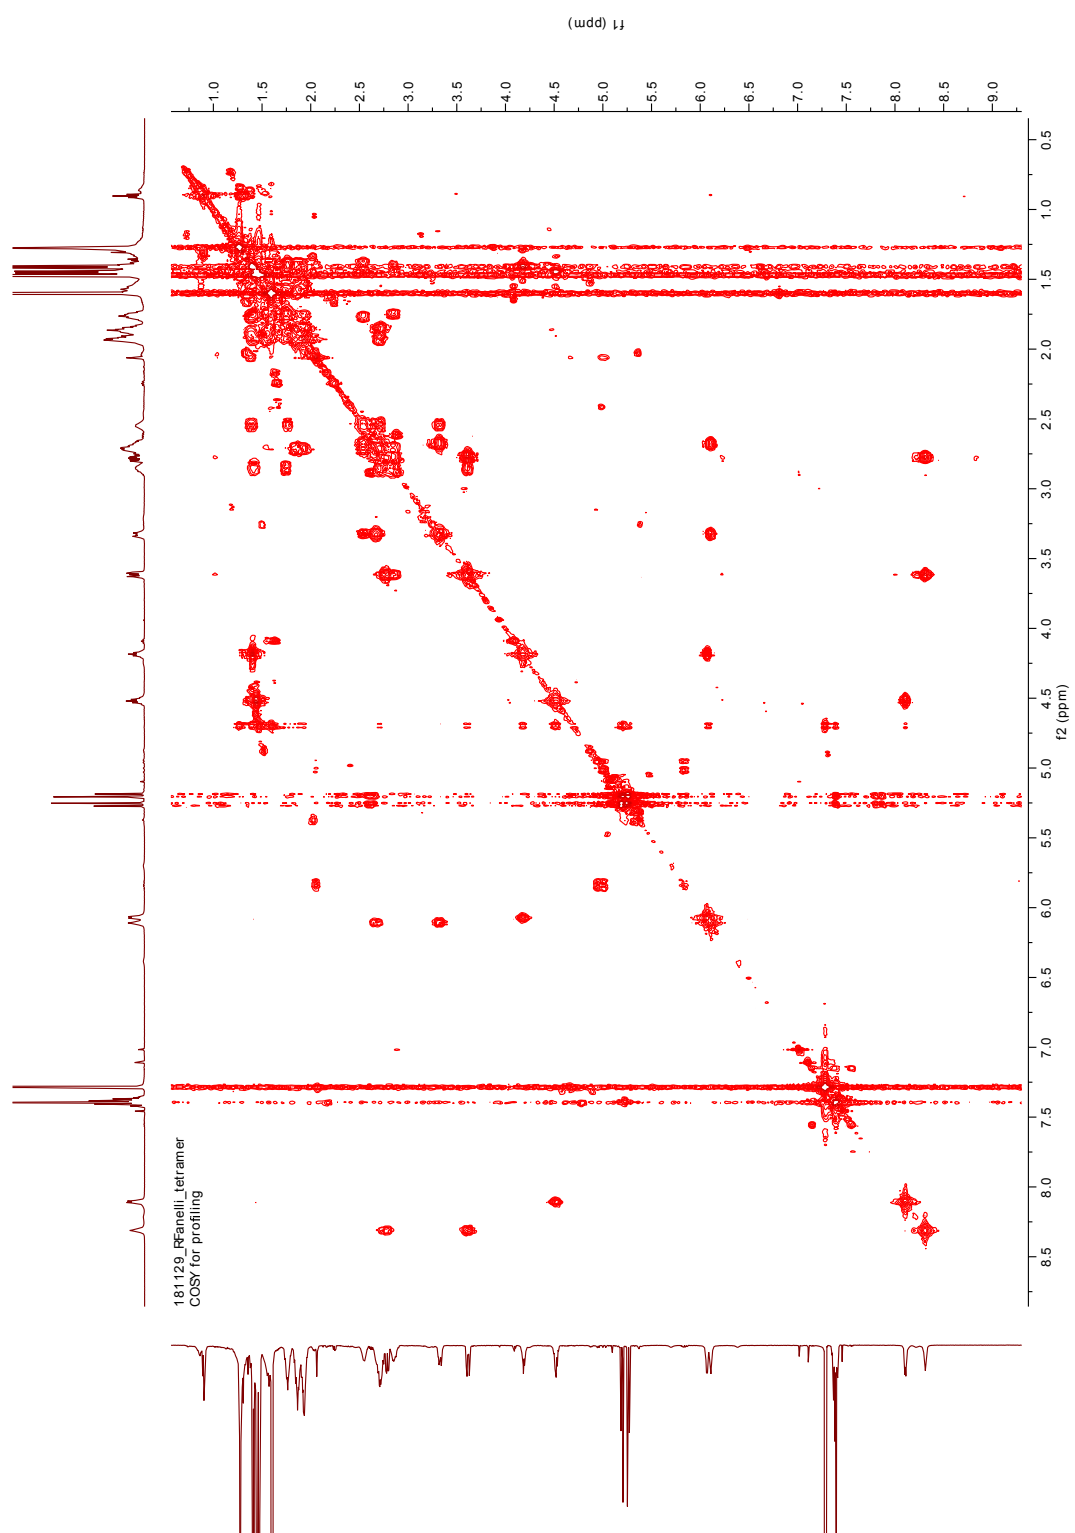

Figure S13: COSY NMR spectrum of **20**.

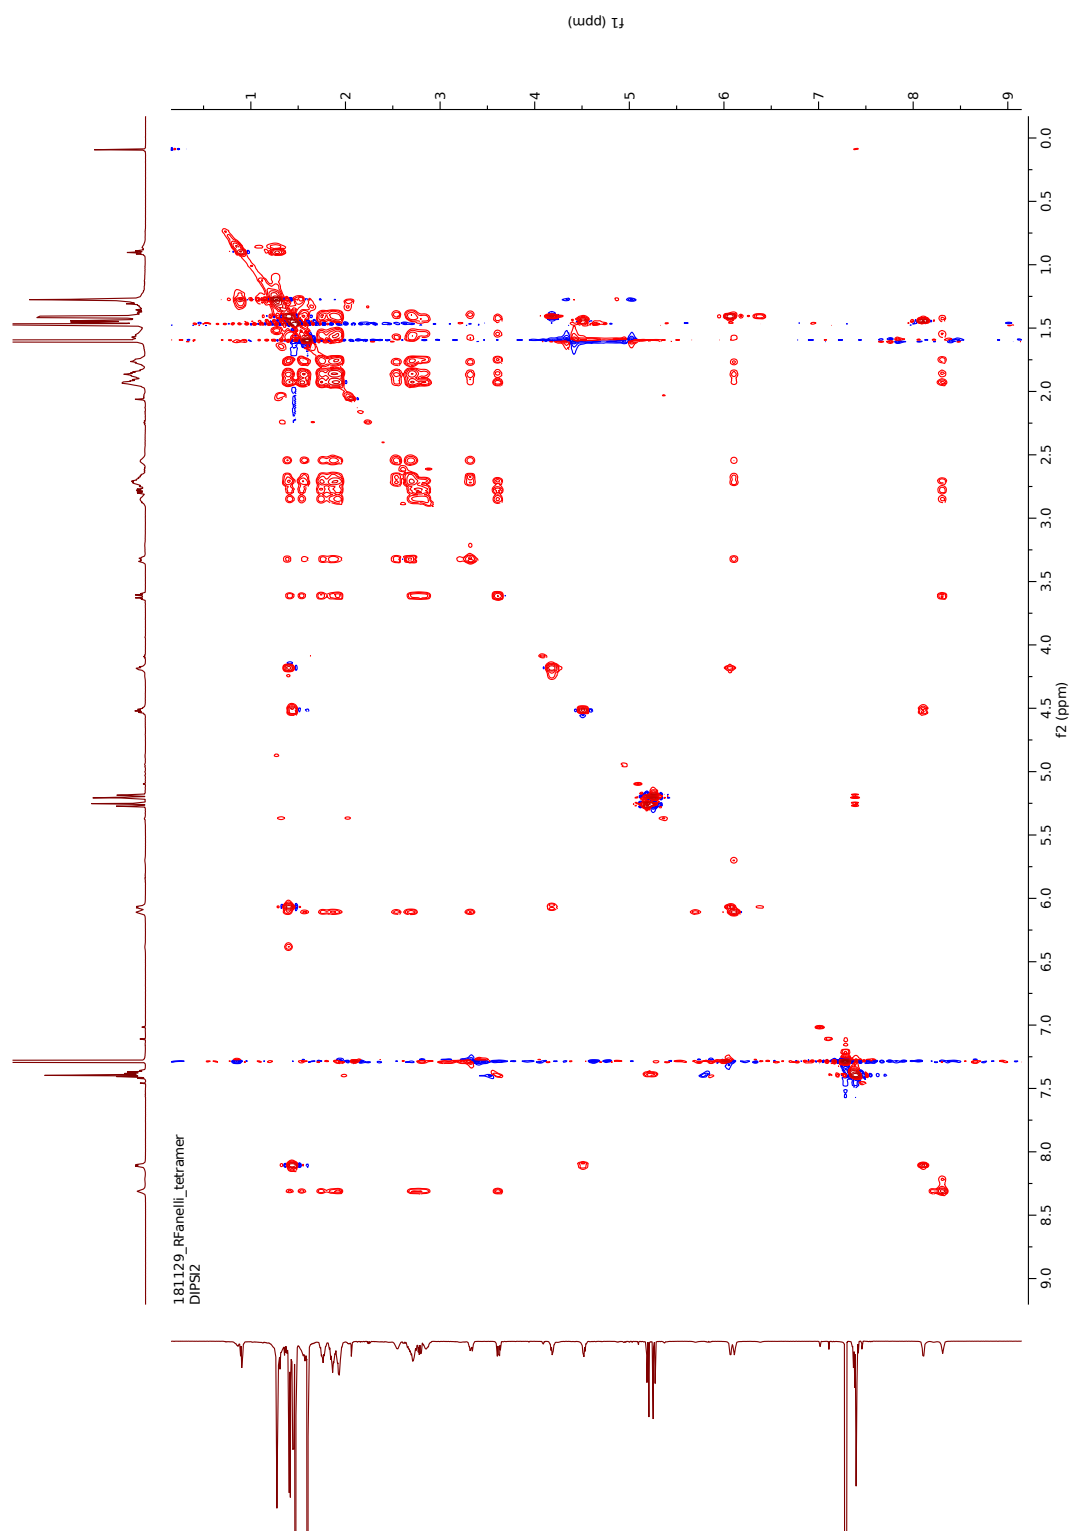

Figure S14: TOCSY NMR spectrum of **20**.

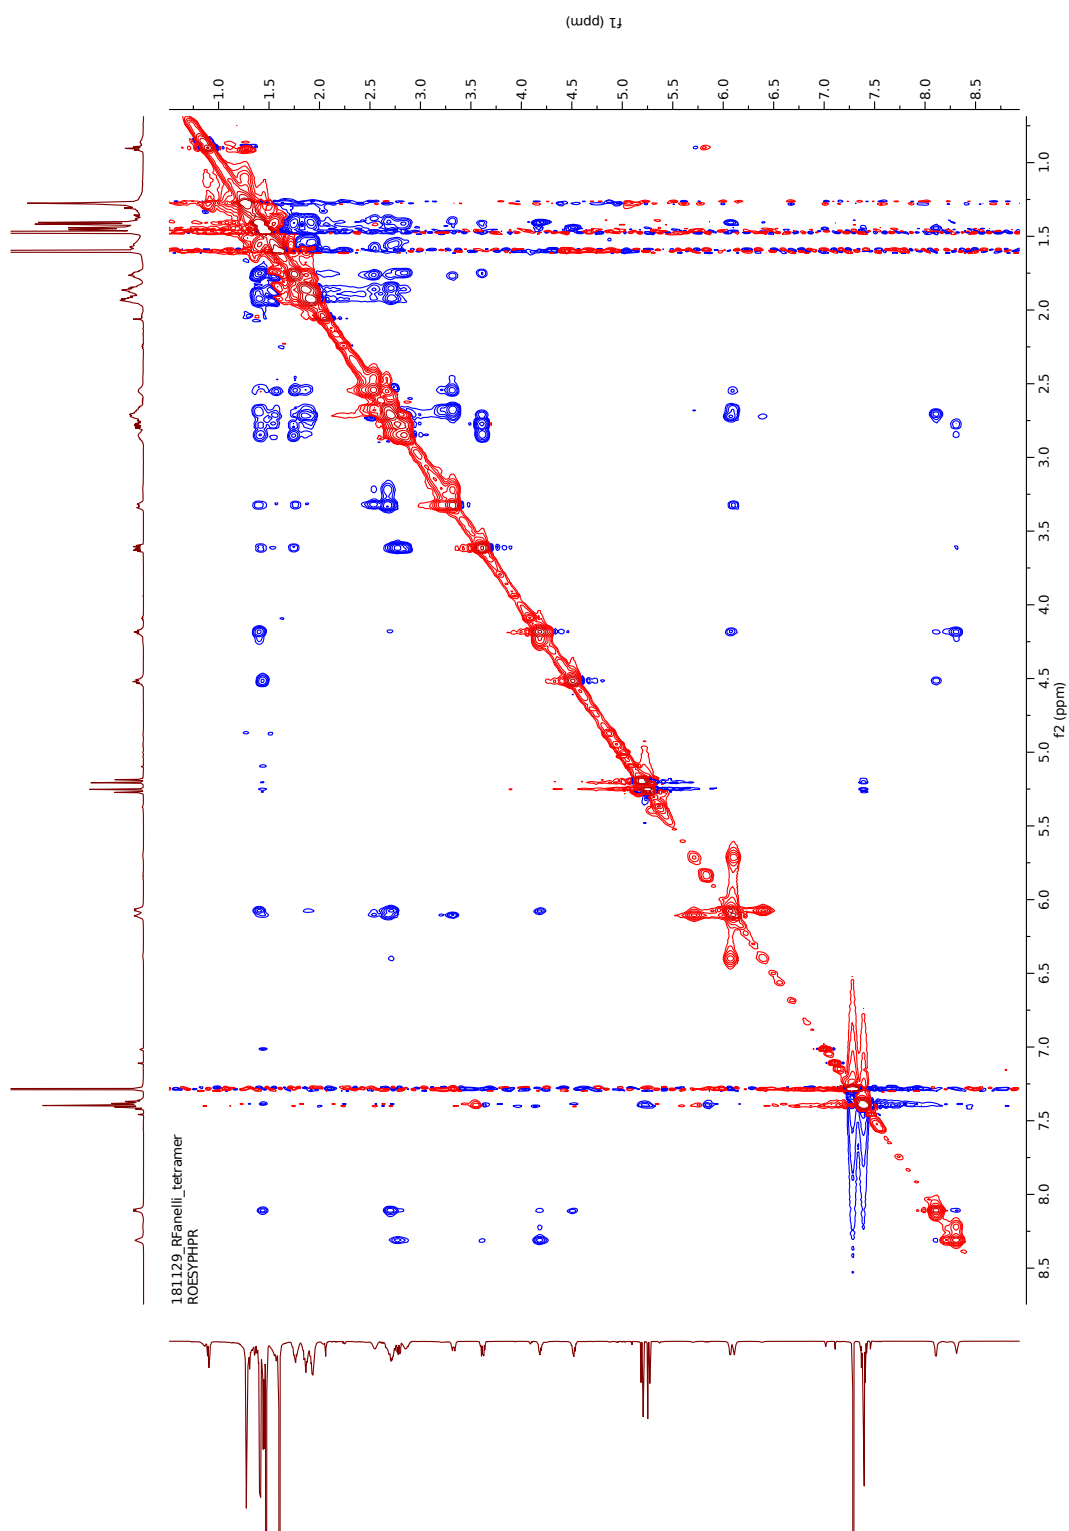

Figure S15: NOESY NMR spectrum of **20**.

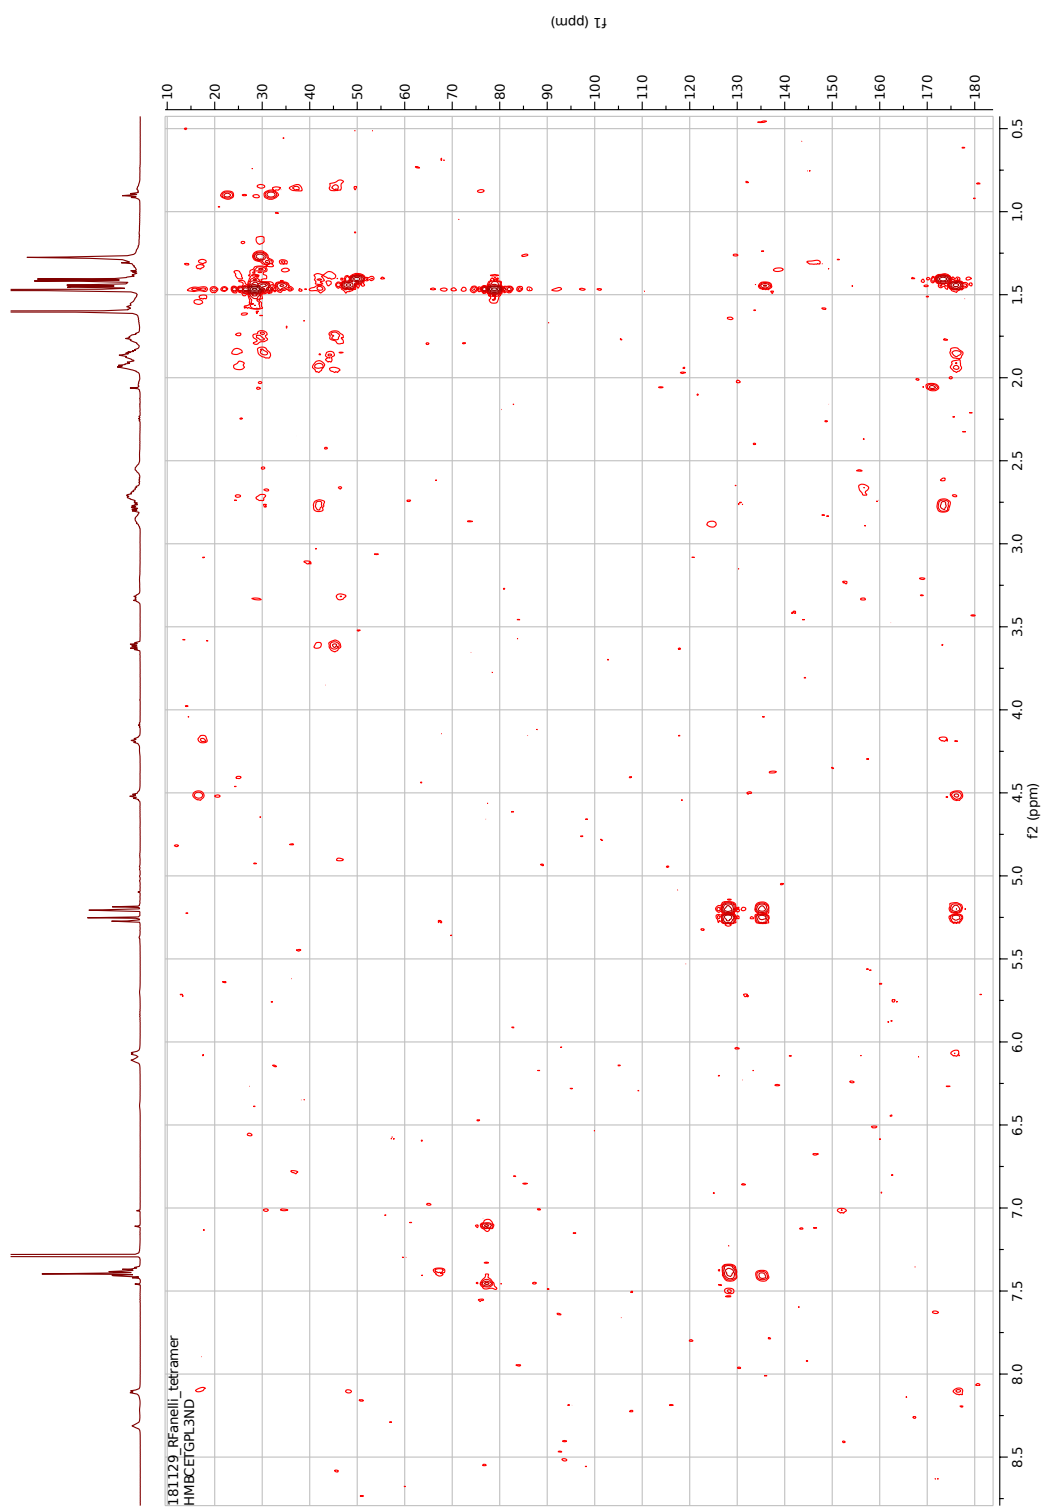

Figure S16: HMBC NMR spectra of **20**.



$\gamma/\alpha$ -peptide Boc(AMCP-l-Ala)<sub>3</sub>OBn **21**

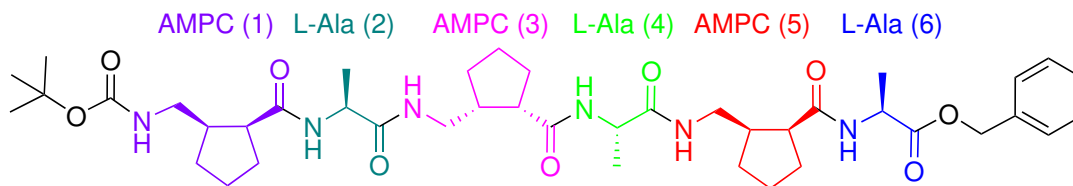

**21**

To a solution of **19** (0.036 g, 0.1 mmol) in DMF (1 mL), DIPEA (0.1 mL, 0.6 mmol), HOBT·H<sub>2</sub>O (0.018 g, 0.12 mmol), EDCI (0.023 g, 0.12 mmol) were added. The reaction mixture was stirred at rt for 15 minutes and then a solution of the amine deprotected **20** (0.054 g, 0.1 mmol) in DMF (1 mL) was added. The reaction mixture was sealed with a septum and it was left stirring at rt for 24 hours. Ethyl acetate (10 mL) was then added and the organic phase was washed with a 1M aqueous solution of NaHSO<sub>4</sub> (2 x 5 mL), a saturated aqueous solution of NaHCO<sub>3</sub> (2 x 5 mL) and then brine (2 x 5 mL). Acid and basic aqueous layers were then extracted twice with CH<sub>2</sub>Cl<sub>2</sub>. All organic layers were combined, dried over Na<sub>2</sub>SO<sub>4</sub>, filtered and concentrate *in vacuo*. The crude product was then purified by flash chromatography on silica gel (gradient hexane/ethyl acetate/methanol) to obtain the titled product **21** as a white solid (0.016 g, 0.02 mmol, 20%).

$[\alpha]_D^{20} +106.0$  (c = 0.05, CH<sub>2</sub>Cl<sub>2</sub>); IR (neat, cm<sup>-1</sup>) 3288, 2927, 1739, 1701, 1635, 1529, 1449, 1366, 1247, 1225, 1169; HRMS required for C<sub>42</sub>H<sub>65</sub>N<sub>6</sub>O<sub>9</sub> [M+H]<sup>+</sup> is 797.4813, found 797.4832. <sup>1</sup>H NMR (600 MHz, CDCl<sub>3</sub>)  $\delta$  8.90 (1 H, s), 8.64 (1 H, d, *J* 6.8), 8.60 – 8.40 (2 H, m), 7.50 – 7.33 (5 H, m), 6.38 (1 H, s), 6.01 (1 H, d, *J* 6.2), 5.27 (1H, d, *J* = 12.3 Hz), 5.19 (1H, d, *J* = 12.3 Hz), 4.48 (1 H, p, *J* 7.3), 4.29 (1 H, q, *J* 6.7), 4.03 (1 H, p, *J* 6.8), 3.66 - 3.54 (2 H, m), 3.45 – 3.31 (1 H, m), 3.04 - 2.89 (2 H, m), 2.88 – 2.77 (2 H, m), 2.77 - 2.68 (2 H, m), 2.68 – 2.55 (2 H, m), 2.54 – 2.42 (1 H, m), 2.02 - 1.92 (2 H, m), 1.94 - 1.83 (4 H, m), 1.83 – 1.70 (3 H, m), 1.48 (10 H, s), 1.46 – 1.43 (5 H, m), 1.41 (3 H, d, *J* 7.5), 1.39 (3 H, d, *J* 7.1).

<sup>13</sup>C NMR (101 MHz, CDCl<sub>3</sub>)  $\delta$  176.9, 176.7, 176.3, 176.0, 175.4, 173.5, 156.6, 139.3,

135.2, 128.6, 128.4, 128.1, 124.8, 114.1, 78.7, 67.4, 53.4, 50.7, 50.3, 48.3, 46.3, 45.1, 44.8, 44.4, 42.5, 42.3, 41.8, 41.7, 36.5, 34.3, 33.8, 31.9, 31.0, 30.9, 30.3, 30.2, 30.1, 29.7, 29.5, 29.4, 29.2, 29.0, 28.5, 25.7, 25.7, 24.7, 22.7, 17.6, 16.9, 16.6, 14.1.

Table S15:  $^1\text{H}$  NMR assignment for the  $\gamma/\alpha$ -peptide **21**.

| Residue  | H $\alpha$ | H $\beta$ | H $\gamma_1$ | H $\gamma_2$ | NH    | CH2   | H-Ar         |
|----------|------------|-----------|--------------|--------------|-------|-------|--------------|
| L-Ala(2) | 4.287      | 1.438     | -            | -            | 6.005 | -     | -            |
| AMCP(5)  | 2.821      | 2.952     | 3.611        | 2.8          | 8.513 | -     | -            |
| L-Ala(4) | 4.033      | 1.387     | -            | -            | 8.537 | -     | -            |
| AMCP(3)  | 2.739      | 2.954     | 3.6          | 2.483        | 8.901 | -     | -            |
| L-Ala(6) | 4.483      | 1.412     | -            | -            | 8.642 | -     | -            |
| AMCP(1)  | 2.726      | 2.6       | 3.377        | 2.614        | 6.377 | -     | -            |
| Benzyl   | -          | -         | -            | -            | -     | 5.236 | 7.33<br>7.44 |

Table S16:  $^{13}\text{C}$  NMR assignment for the  $\gamma/\alpha$ -peptide **21**.

| Residue  | C $\alpha$ | C $\beta$ | C $\gamma$ | CH2   | HAr                                  | CO     |
|----------|------------|-----------|------------|-------|--------------------------------------|--------|
| L-Ala(2) | 50.33      | 17.65     | -          | -     | -                                    | 173.38 |
| AMCP(5)  | 45.1       | 41.77     | 42.45      | -     | -                                    | 176.72 |
| L-Ala(4) | 50.71      | 16.98     | -          | -     | -                                    | 175.51 |
| AMCP(3)  | 44.71      | 41.77     | 42.33      | -     | -                                    | 176.9  |
| L-Ala(6) | 48.32      | 16.64     | -          | -     | -                                    | 176.38 |
| AMCP(1)  | 46.26      | 44.42     | 42         | -     | -                                    | 176.03 |
| Benzyl   | -          | -         | -          | 67.41 | 135.22,<br>128.6,<br>128.4,<br>128.1 | -      |

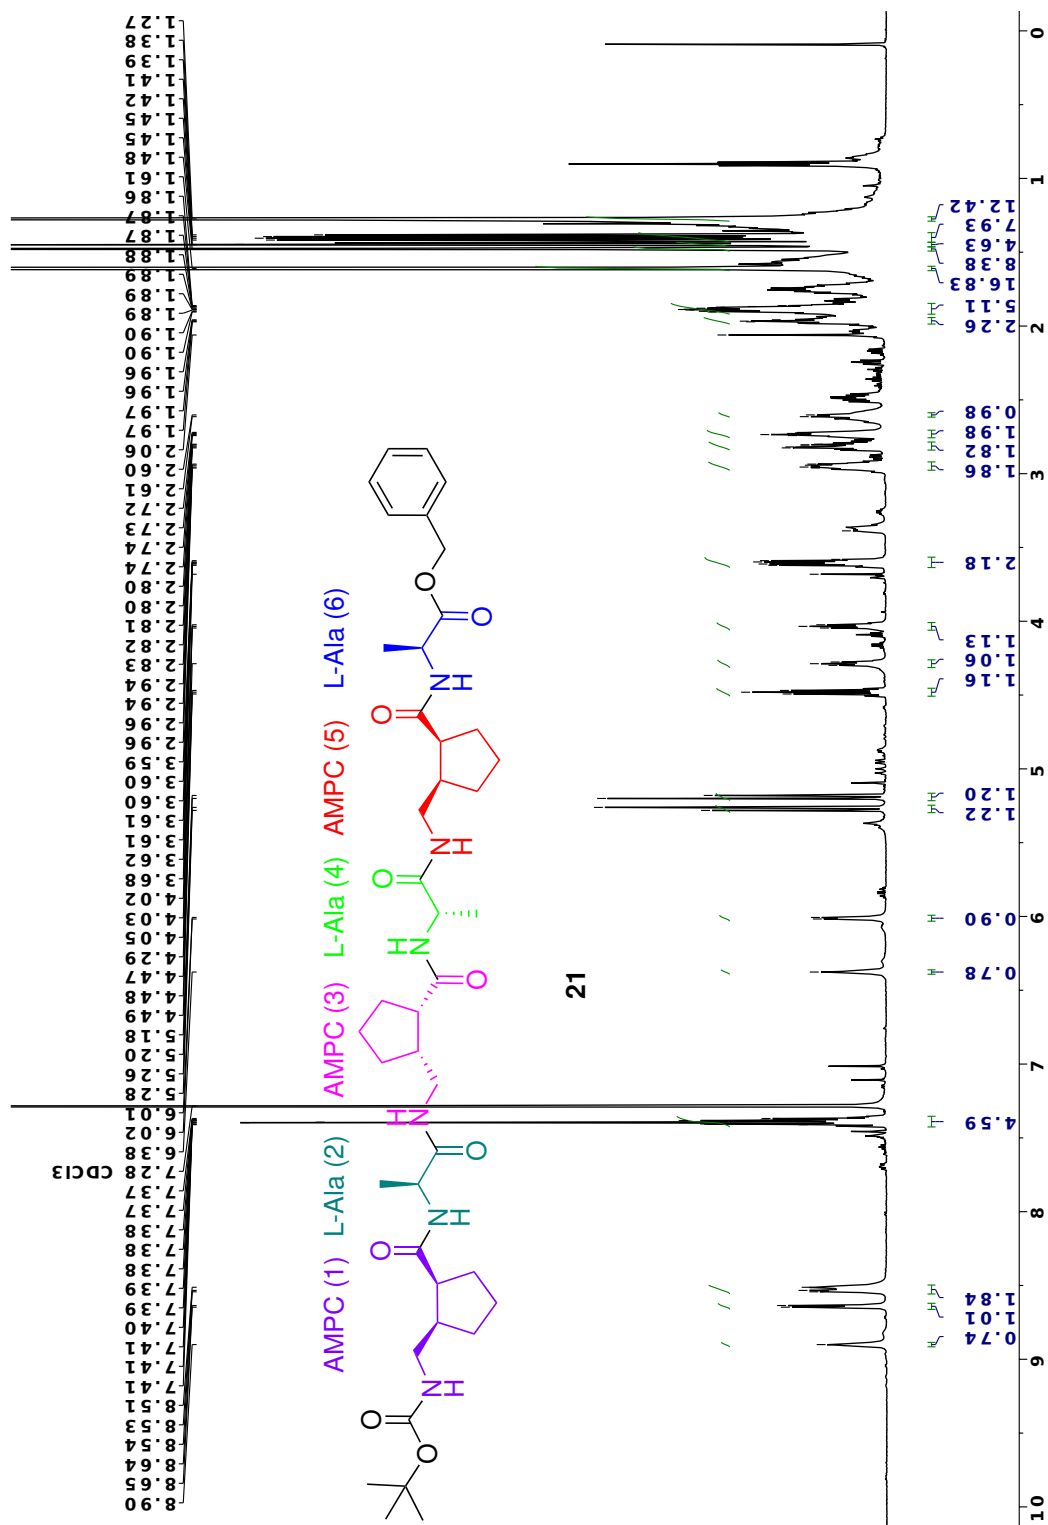

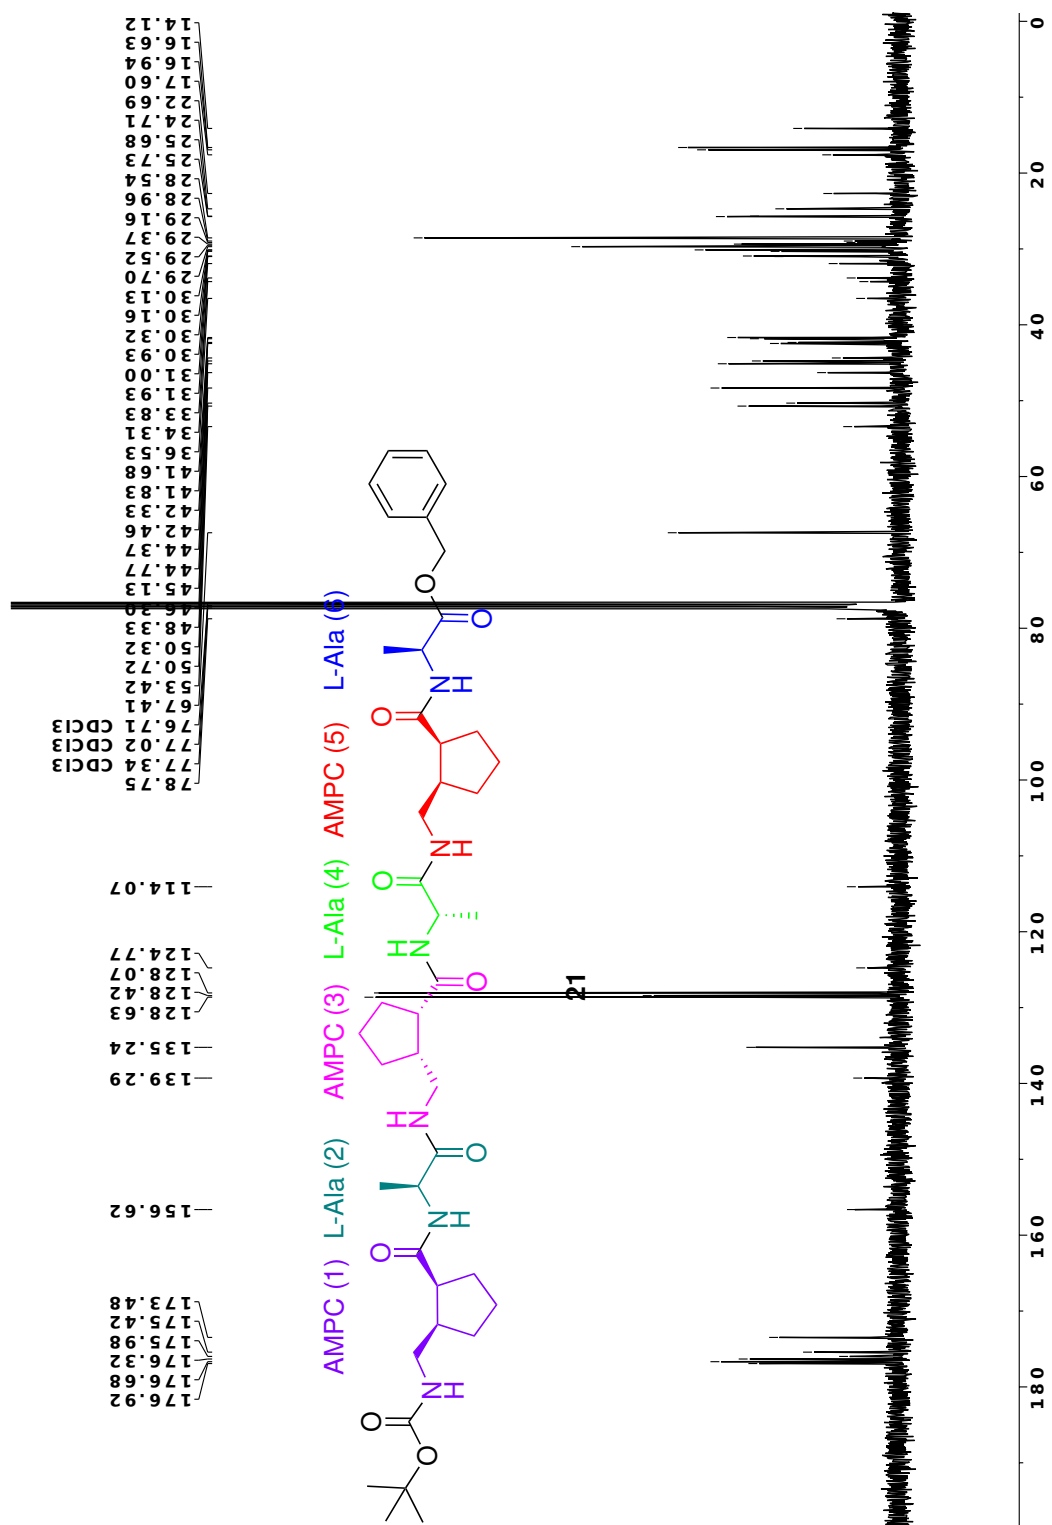

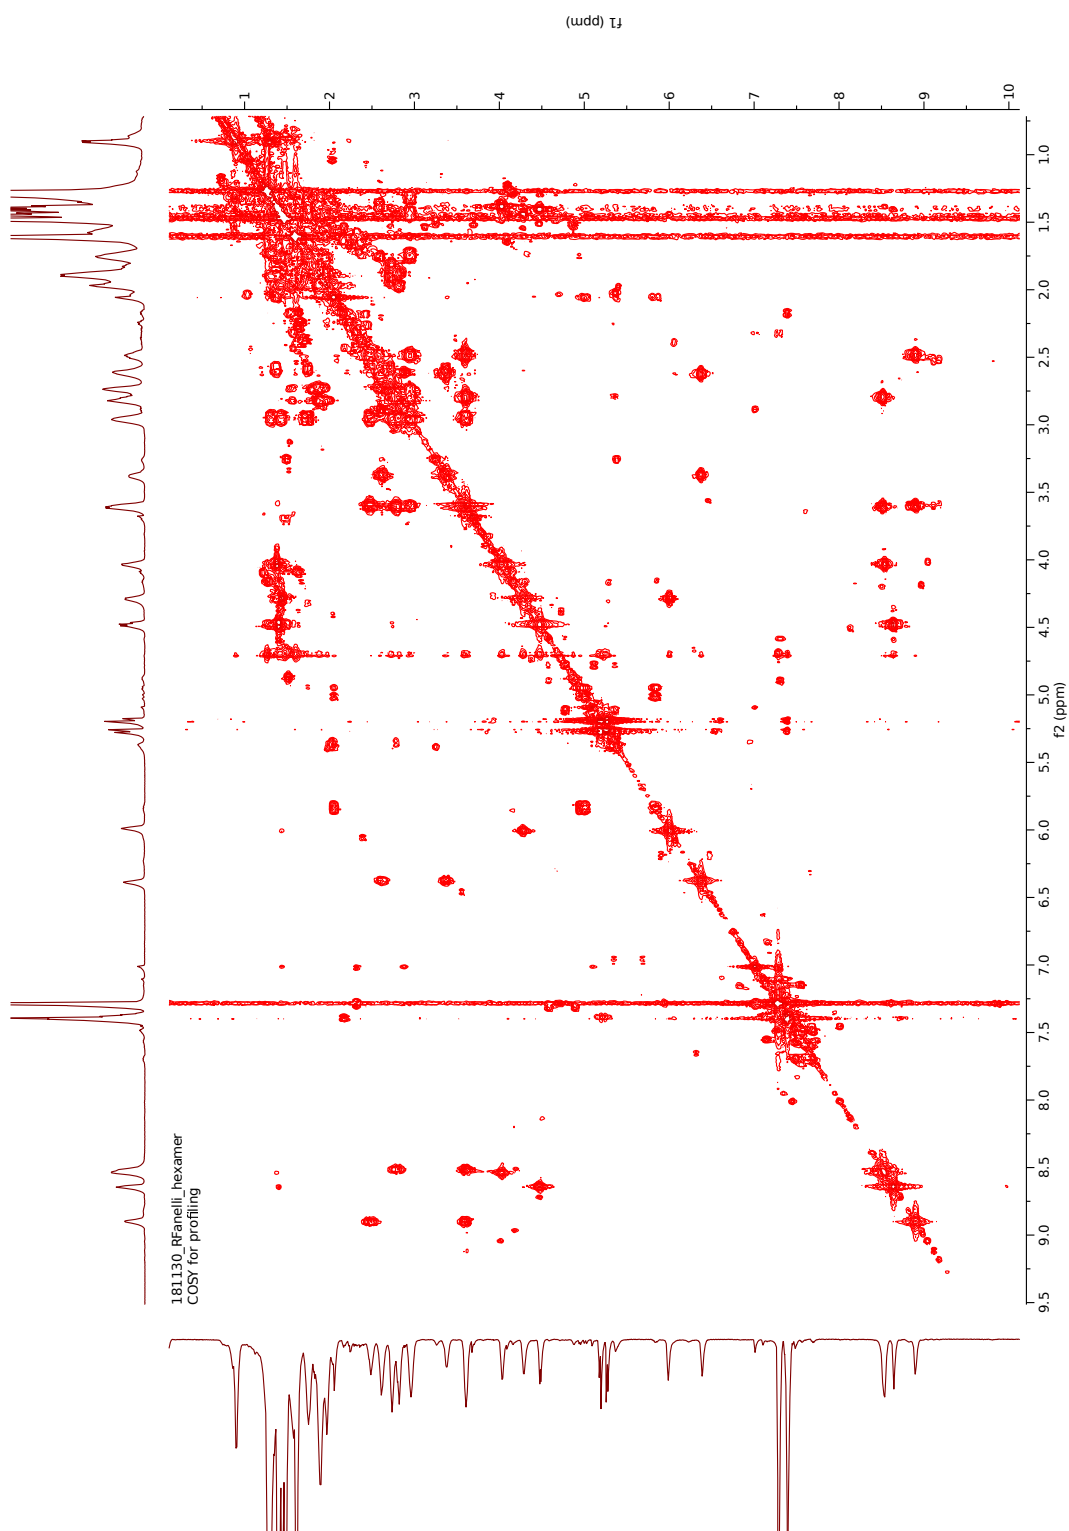

Figure S17: COSY NMR spectra of **21**.

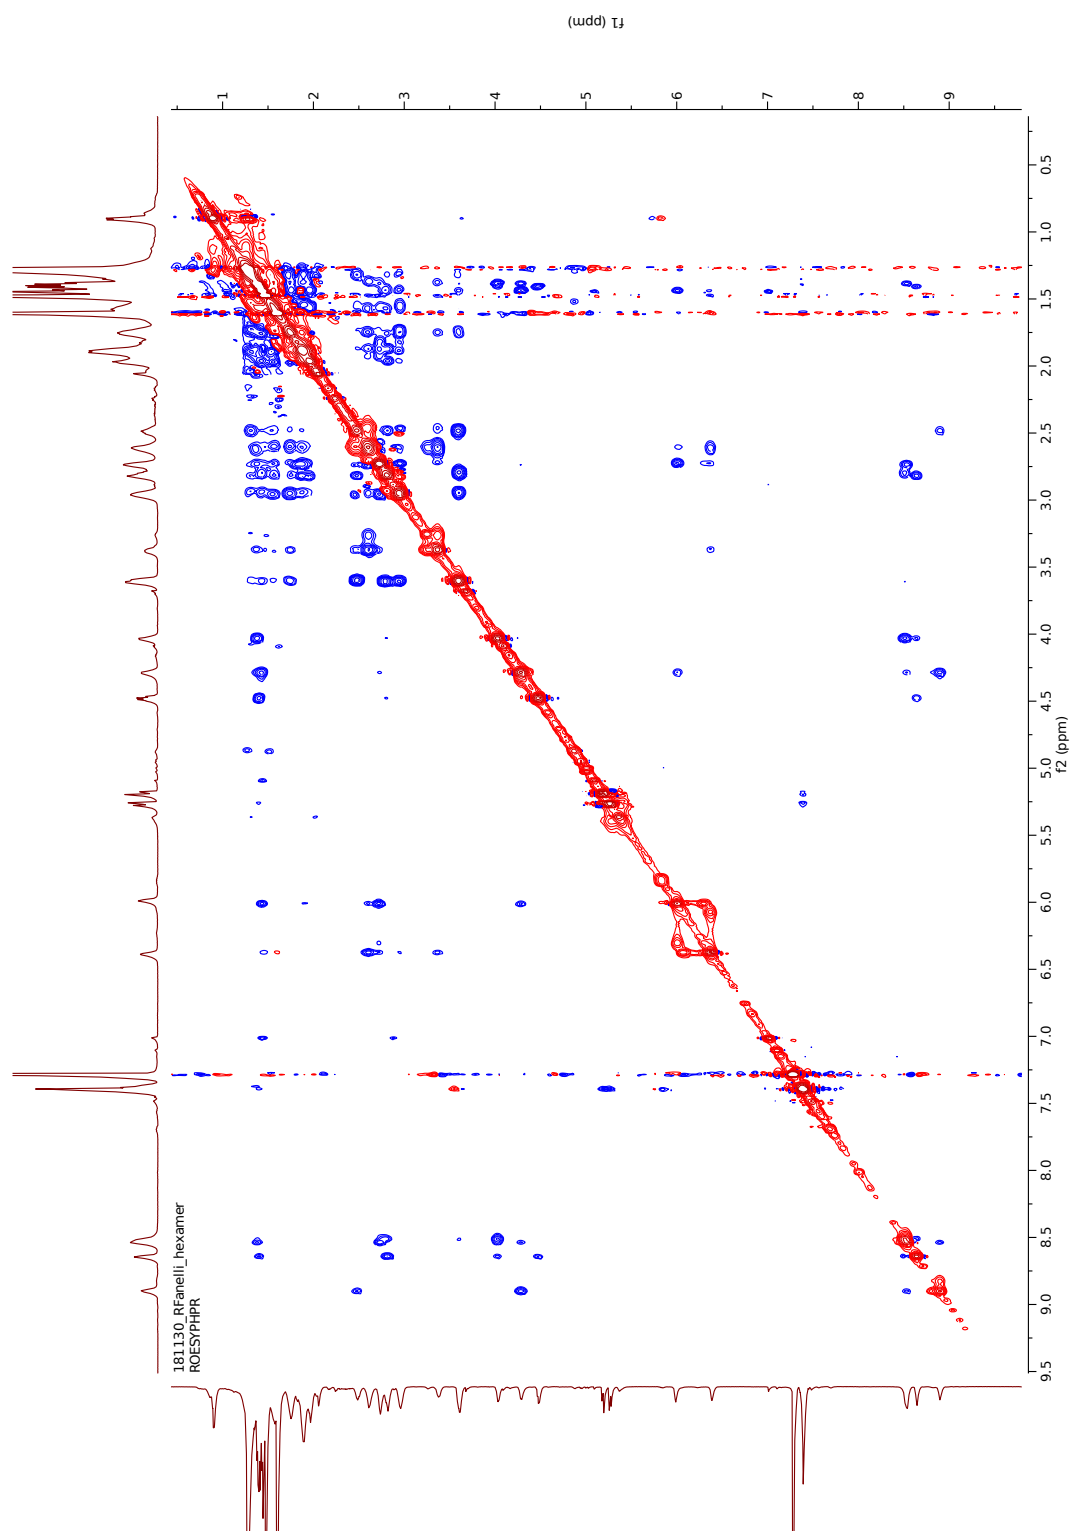

Figure S18: ROESY NMR spectra of **21**.

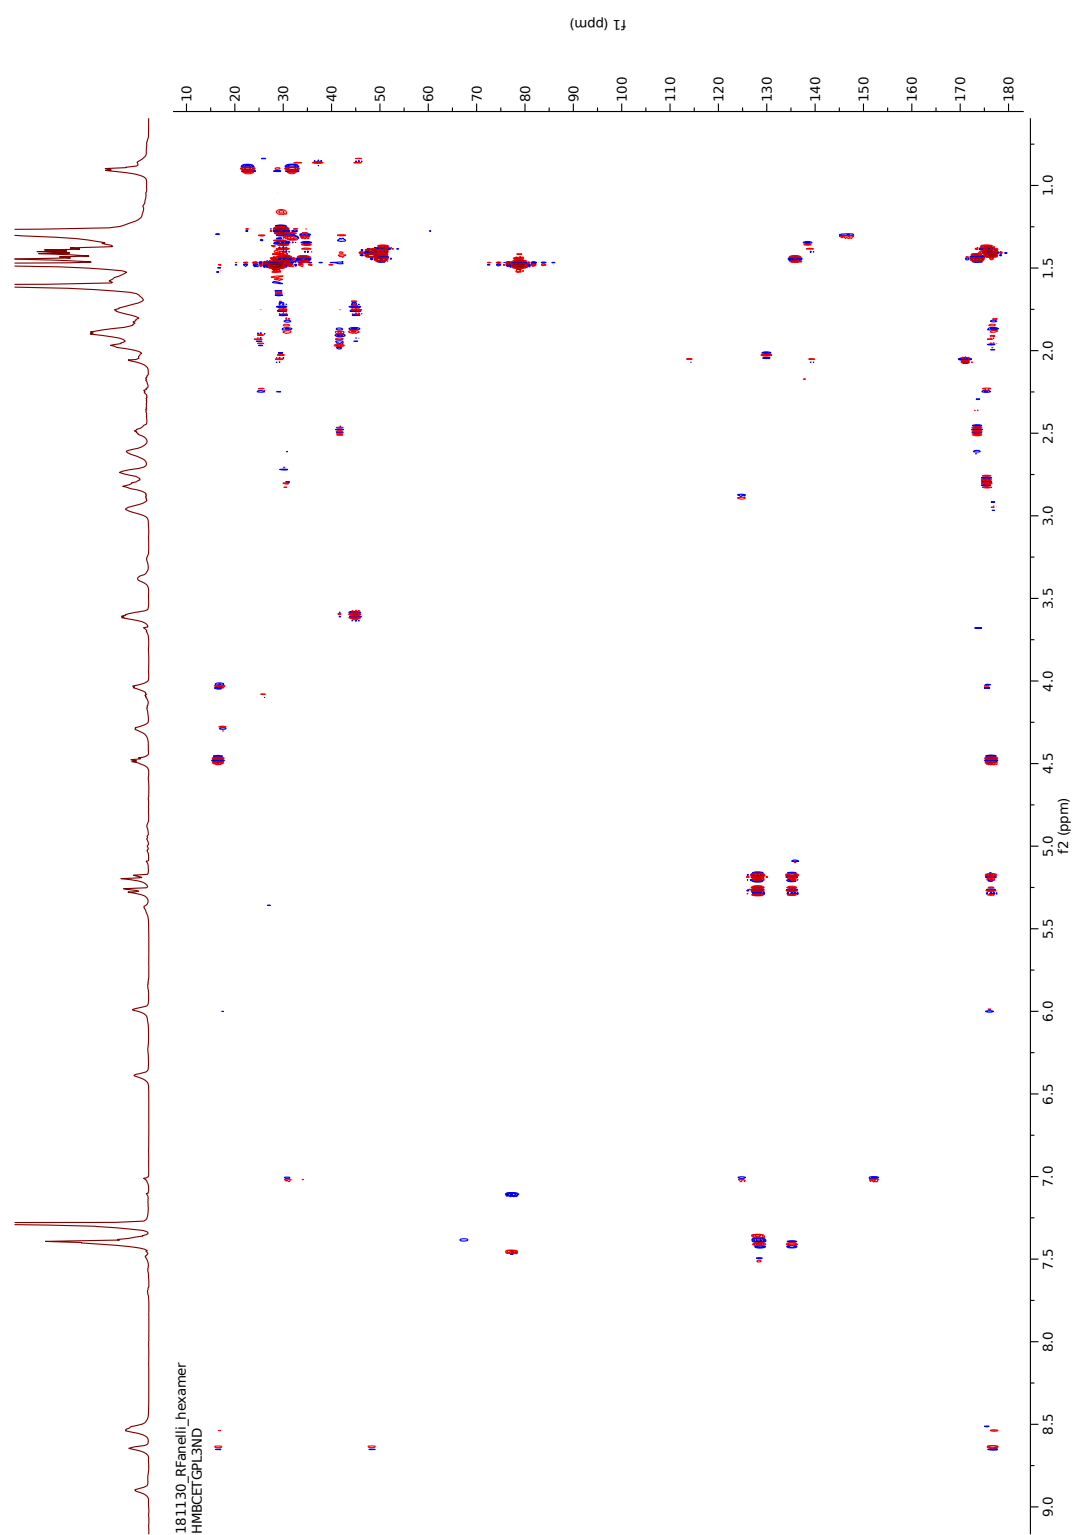

Figure S19: HMBC NMR spectra of **21**.

## Circular Dichroism

A preliminary study of the secondary structure of peptides **18**, **20** and **21** was conducted with circular dichroism (CD, Figure S20). In contrast with dimer **18**, both tetramer **20** and hexamer **21** present a characteristic pattern associated with helical conformations (Figure S20).<sup>10</sup>

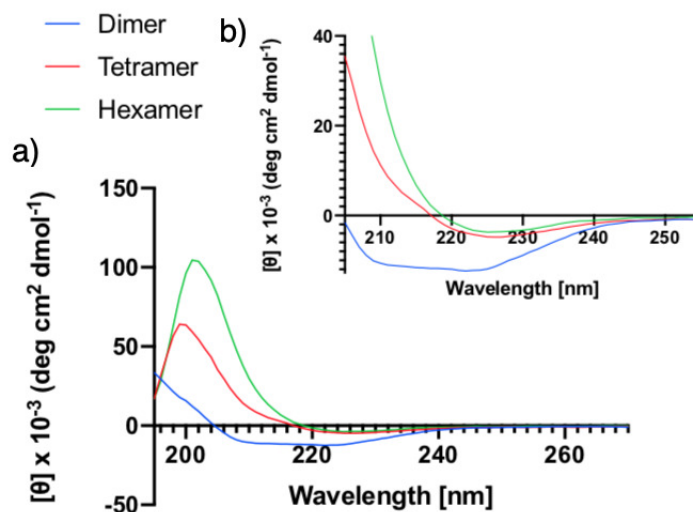

Figure S20: (a) circular dichroism of the  $\alpha/\gamma$ -peptides **18**, **20** and **21** at 2mM concentration in methanol; (b) graph zoomed in 200-250 nm.



## Aggregation control experiment and observed NOE cross peaks

An aggregation control experiment was conducted on hexamer **21** to prove there is no self-association and confirm that the downfield detected amide peaks are due to intramolecular interactions rather than intermolecular interactions.  $^1\text{H}$  NMR of  $\gamma/\alpha$ -peptide **21** was mea-

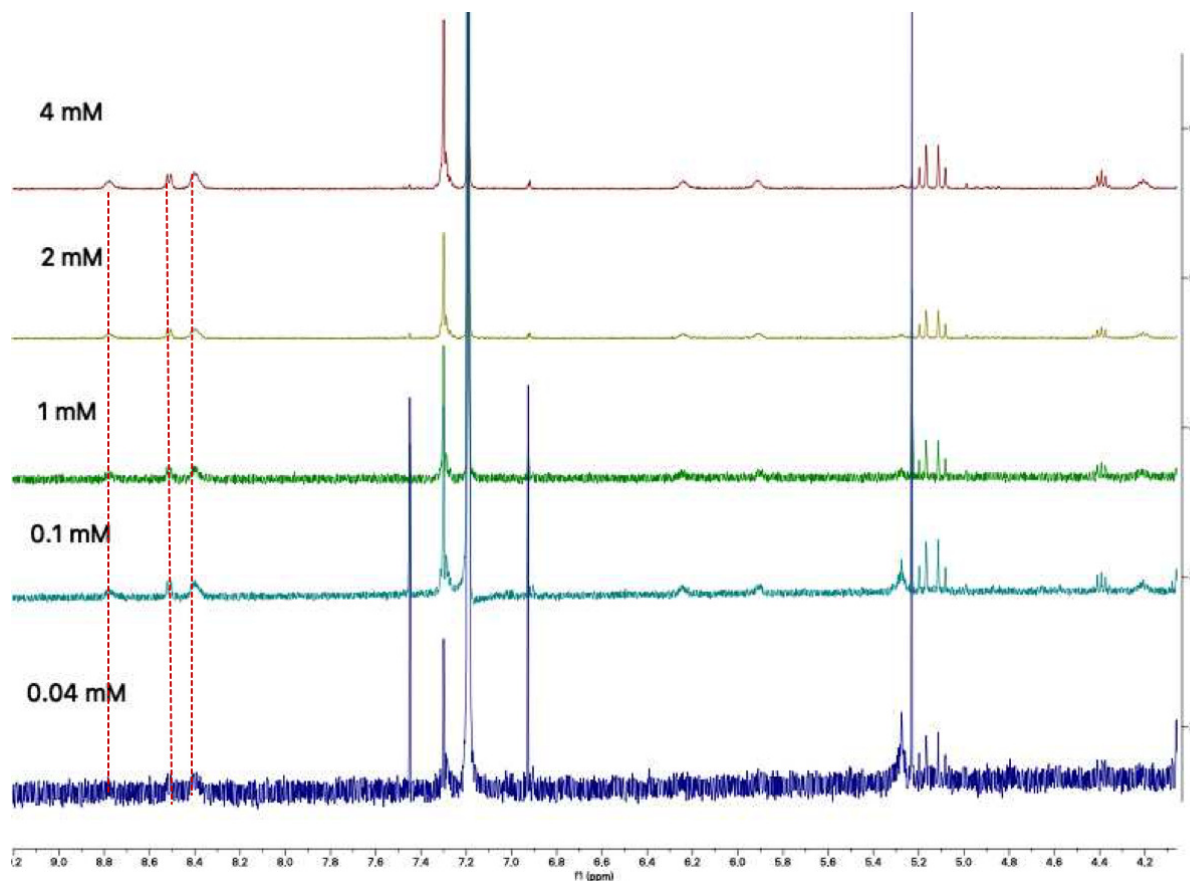

Figure S21:  $^1\text{H}$  NMR spectra in  $\text{CDCl}_3$  of the  $\gamma/\alpha$ -peptide **21** at 0.4, 0.1, 1, 2 and 4mM concentration for an aggregation control experiment.

sured in  $\text{CDCl}_3$  at different concentrations (0.04mM – 4 mM). This experiment displays the amide peaks at the same chemical shifts for all different concentrations, which confirms the fact that the downfield NH peaks are due to intramolecular H-bonds, rather than intermolecular H-bonds (Figure S21).<sup>11,12</sup> The experiment was conducted on the longest oligomer that was synthesised (**21**), which is also the one that presents a more defined secondary structure.

Table S17: Unambiguous Observed NOE cross peaks for hexamer **21**.

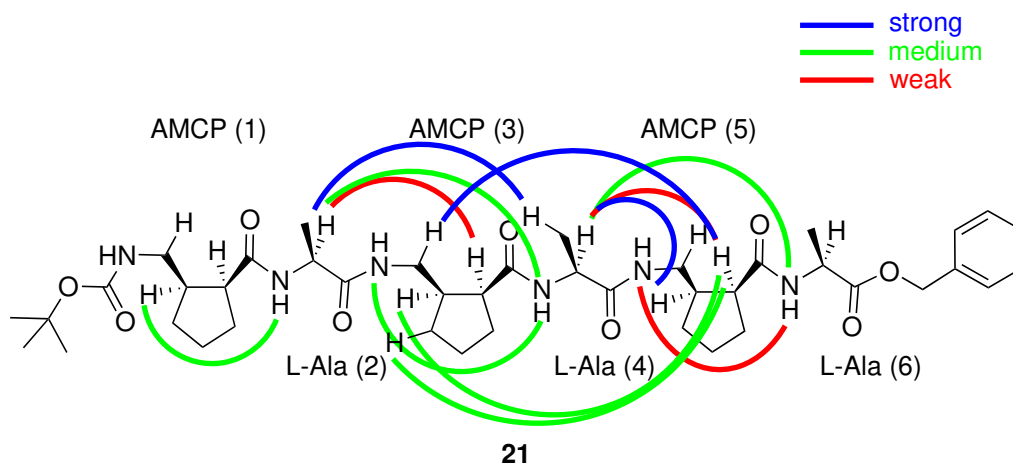

| NOE cross peak                                               | NMR distance Å | Designation   |
|--------------------------------------------------------------|----------------|---------------|
| NH (1) - HC $\alpha$ (2)                                     | 4.95           | weak          |
| HC $\alpha$ (1) - HC $\alpha$ (2)                            | 4.28           | weak          |
| HC $\beta$ (1) - NH (2)                                      | 3.42           | medium        |
| HC $\beta$ (1) - HC $\alpha$ (2)                             | 4.68           | weak          |
| NH (1) - H $\beta$ (3)                                       | 3.90           | weak          |
| NH (1) - H $\gamma''$ (3)                                    | 4.20           | weak          |
| HC $\gamma'$ (1) - HC $\gamma''$ (3)                         | 3.91           | weak          |
| <b>HC<math>\alpha</math> (2) - HC<math>\alpha</math> (3)</b> | <b>4.28</b>    | <b>weak</b>   |
| HC $\alpha$ (2) - HC $\beta$ (3)                             | 4.27           | weak          |
| HC $\alpha$ (2) - HC $\gamma''$ (3)                          | 5.33           | weak          |
| <b>HC<math>\alpha</math> (2) - NH (4)</b>                    | <b>3.47</b>    | <b>medium</b> |
| HC $\alpha$ (2) - HC $\beta$ (4)                             | 2.99           | strong        |
| HC $\beta$ (3) - NH (3)                                      | 4.09           | weak          |
| <b>NH (3) - NH (4)</b>                                       | <b>3.46</b>    | <b>medium</b> |
| HC $\alpha$ (3) - NH (4)                                     | 2.68           | strong        |
| HC $\alpha$ (3) - HC $\alpha$ (4)                            | 4.30           | weak          |
| HC $\gamma'$ (3) - HC $\alpha$ (4)                           | 5.1            | weak          |
| HC $\gamma'$ (3) - HC $\alpha$ (4)                           | 5.03           | weak          |
| HC $\beta$ (3) - HC $\alpha$ (5)                             | 3.27           | medium        |
| HC $\gamma''$ (3) - HC $\alpha$ (5)                          | 2.62           | strong        |
| HC $\gamma''$ (3) - HC $\alpha$ (5)                          | 3.25           | medium        |
| HC $\alpha$ (4) - NH (5)                                     | 2.48           | strong        |
| HC $\alpha$ (4) - HC $\beta$ (5)                             | 2.96           | strong        |
| HC $\beta$ (4) - HC $\gamma'$ (5)                            | 4.27           | weak          |
| <b>HC<math>\alpha</math> (4) - NH (6)</b>                    | <b>3.47</b>    | <b>medium</b> |
| <b>HC<math>\alpha</math> (4) - HC<math>\alpha</math> (5)</b> | <b>3.96</b>    | <b>weak</b>   |
| <b>NH (5) - NH (6)</b>                                       | <b>3.79</b>    | <b>weak</b>   |
| HC $\alpha$ (5) - NH (6)                                     | 2.58           | strong        |
| HC $\beta$ (5) - NH (6)                                      | 4.40           | weak          |
| HC $\alpha$ (5) - HC $\alpha$ (6)                            | 4.73           | weak          |
| HC $\gamma'$ (5) - HC $\alpha$ (6)                           | 4.73           | weak          |

# Computations

## Methods

Conformational sampling was carried out using mixed low-mode Monte-Carlo search<sup>13-15</sup> as implemented in Schrodinger 2017-1<sup>16</sup> based on the OPLS 2005 all atom force field,<sup>17-19</sup> followed by conformational clustering.

Kohn-Sham DFT calculations were done for the mechanistic studies using Gaussian09 Rev.E.<sup>20</sup> The presented result were obtained employing the  $\omega$ B97XD range separated hybrid functional,<sup>21</sup> with the basis 6-311G(d,p) for optimization, frequency and solvent calculations and the 6-311++G(3df,3pd) basis for electronic energies.<sup>22-24</sup> Thermochemical corrections were calculated according to Grimme's quasi-RRHO<sup>25</sup> approximation as implemented in goodvibes.<sup>26</sup> Solvent corrections are determined for DCE using PCM solvent model with Truhlar's SMD parametrization.<sup>27,28</sup>

## Calculated Energies

### Induction of Selectivity

The following hypothetical reactions have been constructed to understand the effect of the tetrazole unit and the pyrrolidine ring's conformation.

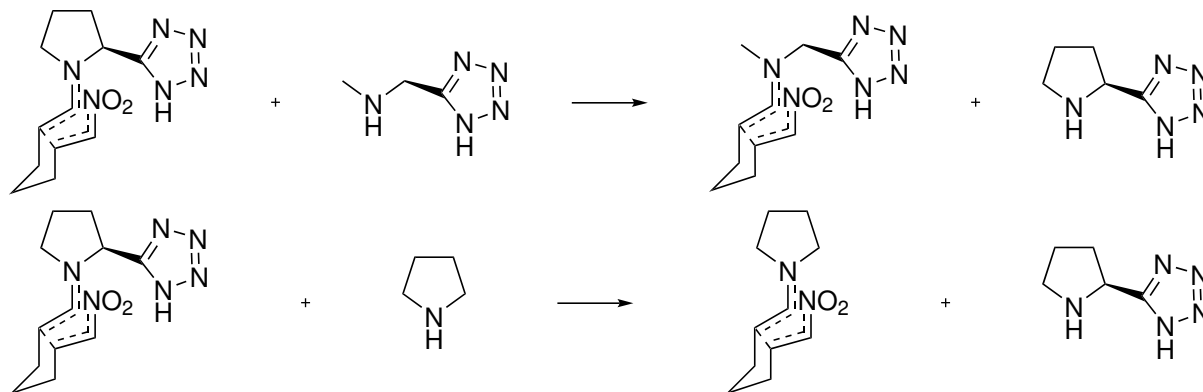

Scheme S4: Imaginary reaction to study the origin of selectivity. Notice the difference between the two sides is the interaction of the removed moiety with the rest of the structure.

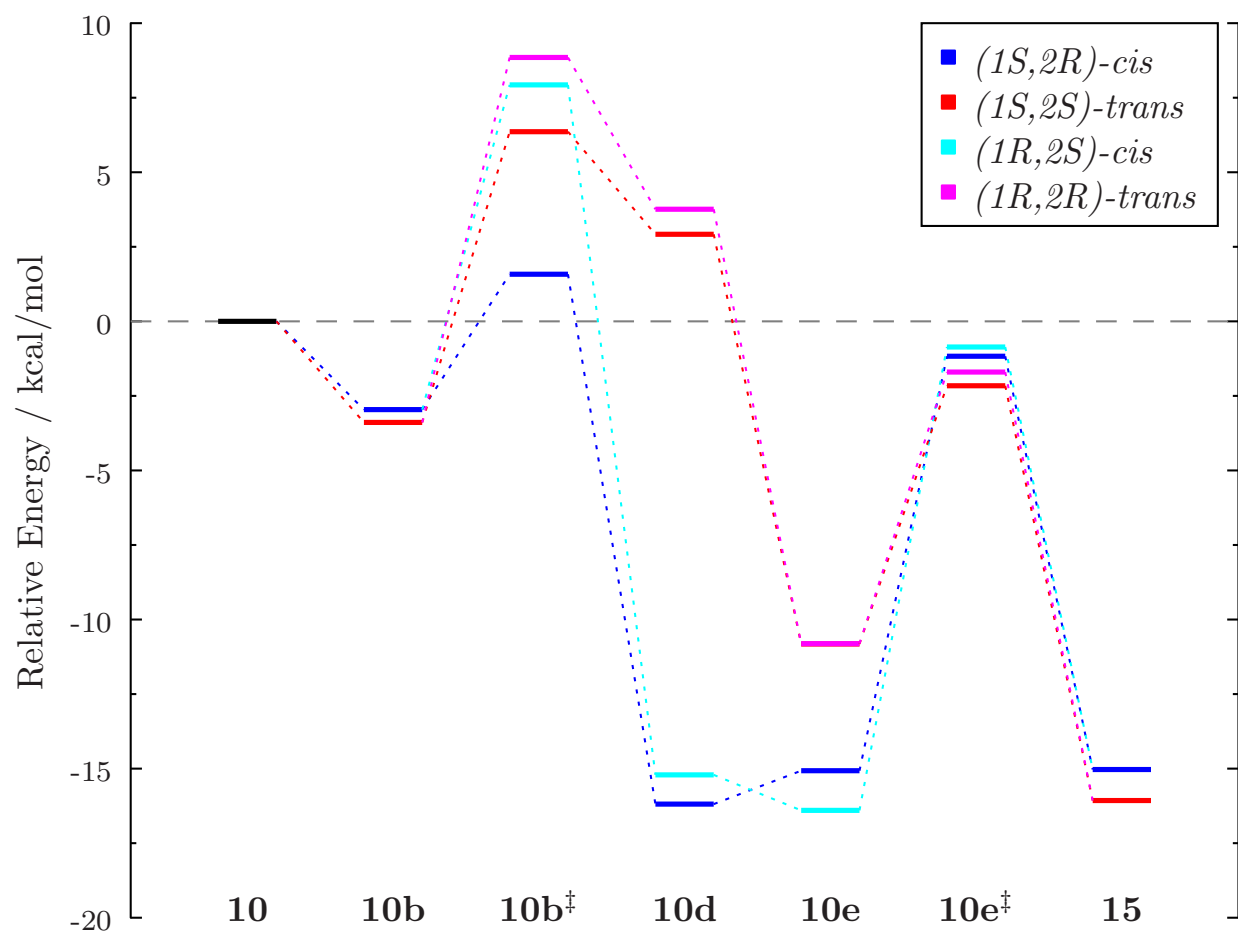

Figure S22: Solvent corrected electronic energy along the reaction coordinate. It is clearly shown that the protonation step's transition states lay lower than the CC bond forming step's without the entropy correction.

Table S18: Calculated energies and Gibbs free energies as presented in Figure 5 in the main text. Values were obtained at the  $\omega$ B97XD/6-311G(d,p) level of theory, unless basis specified and are in hartree.  $G_{\text{therm}}$  is given at 298 K and 1 atm, qRRHO data is calculated at the concentration of 0.04 M

|                                                   | $E_{\text{SP}}$ | $G_{\text{therm}}$ | $G_{\text{qRRHO}(253)}$ | $G_{\text{qRRHO}(298)}$ | $G_{\text{solv=DCE}}$ | $E(6\text{-}311++G(3\text{df},3\text{pd}))$ |
|---------------------------------------------------|-----------------|--------------------|-------------------------|-------------------------|-----------------------|---------------------------------------------|
| <b>V</b>                                          | -469.621079737  | -469.495528        | -469.488611             | -469.494561             | -469.621079737        | -469.665243816                              |
| <b>1</b>                                          | -553.635288342  | -553.496528        | -553.486999             | -553.494122             | -553.635288342        | -553.687704343                              |
| water                                             | -76.423353397   | -76.416192         | -76.416192              | -76.41622               | -76.423353397         | -76.4383130367                              |
| <b>1b</b> (pre- <i>cis</i> )                      | -946.836877190  | -946.568887        | -946.556856             | -946.565660             | -946.836877190        | -946.922377559                              |
| <b>1b</b> (pre- <i>trans</i> )                    | -946.838583781  | -946.572888        | -946.559697             | -946.568646             | -946.838583781        | -946.924128500                              |
| ( <i>1S</i> , <i>2S</i> )- <b>1b</b> <sup>†</sup> | -946.814746140  | -946.543569        | -946.532832             | -946.541237             | -946.814746140        | -946.900771093                              |
| ( <i>1R</i> , <i>2R</i> )- <b>1b</b> <sup>†</sup> | -946.809430513  | -946.537152        | -946.526685             | -946.535044             | -946.809430513        | -946.894996939                              |
| ( <i>1S</i> , <i>2R</i> )- <b>1b</b> <sup>†</sup> | -946.826248358  | -946.552554        | -946.542915             | -946.551166             | -946.826248358        | -946.910825548                              |
| ( <i>1R</i> , <i>2S</i> )- <b>1b</b> <sup>†</sup> | -946.815806039  | -946.543154        | -946.533140             | -946.541487             | -946.815806039        | -946.901350324                              |
| ( <i>1S</i> , <i>2S</i> )- <b>1d</b>              | -946.827251799  | -946.554637        | -946.542746             | -946.551180             | -946.827251799        | -946.911608405                              |
| ( <i>1R</i> , <i>2R</i> )- <b>1d</b>              | -946.826485766  | -946.554625        | -946.542557             | -946.551036             | -946.826485766        | -946.910800024                              |
| ( <i>1S</i> , <i>2R</i> )- <b>1d</b>              | -946.858429165  | -946.585606        | -946.573633             | -946.581965             | -946.858429165        | -946.941568527                              |
| ( <i>1R</i> , <i>2S</i> )- <b>1d</b>              | -946.856453377  | -946.585550        | -946.572697             | -946.581216             | -946.856453377        | -946.940468880                              |
| ( <i>1S</i> , <i>2S</i> )- <b>1e</b>              | -946.844975318  | -946.571869        | -946.560276             | -946.568667             | -946.844975318        | -946.931214192                              |
| ( <i>1R</i> , <i>2R</i> )- <b>1e</b>              | -946.843954863  | -946.570881        | -946.559302             | -946.567673             | -946.843954863        | -946.930217381                              |
| ( <i>1S</i> , <i>2R</i> )- <b>1e</b>              | -946.855548328  | -946.581345        | -946.570058             | -946.578347             | -946.855548328        | -946.939941142                              |
| ( <i>1R</i> , <i>2S</i> )- <b>1e</b>              | -946.852894447  | -946.578434        | -946.567200             | -946.575474             | -946.852894447        | -946.938840908                              |
| ( <i>1S</i> , <i>2S</i> )- <b>1e</b> <sup>†</sup> | -1023.26458131  | -1022.974427       | -1022.961950            | -1022.970903            | -1023.26458131        | -1023.35749357                              |
| ( <i>1R</i> , <i>2R</i> )- <b>1e</b> <sup>†</sup> | -1023.26086660  | -1022.969795       | -1022.957859            | -1022.966749            | -1023.26086660        | -1023.35273521                              |
| ( <i>1S</i> , <i>2R</i> )- <b>1e</b> <sup>†</sup> | -1023.25970289  | -1022.967407       | -1022.955583            | -1022.964426            | -1023.25970289        | -1023.35113506                              |
| ( <i>1R</i> , <i>2S</i> )- <b>1e</b> <sup>†</sup> | -1023.26125226  | -1022.968186       | -1022.956924            | -1022.965711            | -1023.26125226        | -1023.35272650                              |
| <i>trans</i> - <b>2</b>                           | -553.667031153  | -553.520748        | -553.512493             | -553.519080             | -553.667031153        | -553.71648698                               |
| <i>cis</i> - <b>2</b>                             | -553.663855226  | -553.518404        | -553.510002             | -553.516670             | -553.663855226        | -553.713705105                              |

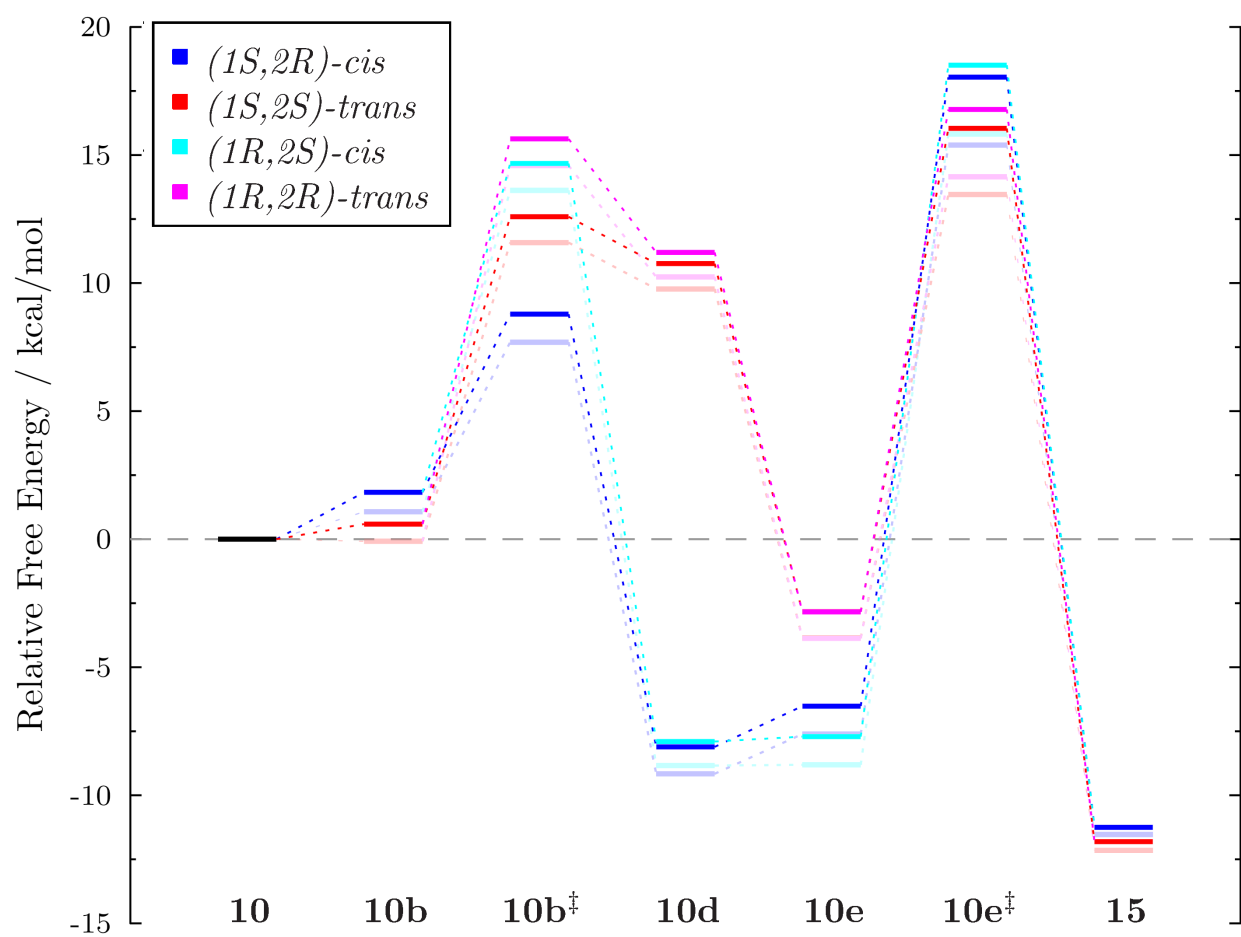

Figure S23: Temperature dependence of the Free Energy Profile, data for 253 K is shown hallow, while 298 K is opaque. While the first TSs increase with 1 kcal/mol, the protonation TSs lay higher by 2.6 kcal/mol.

Table S19: Energy values corresponding to the reactions presented in Scheme S4 and are in kcal/mol.  $\Delta G(253\text{K})$  is for the sake of comparing the paths as shown in Figure 5 in the manuscript.  $\Delta E$  and  $\Delta E_{\text{opt}}$  are the electronic energy before and after optimization, respectively, while  $\Delta G$  is the Gibbs free energy after optimization. The more positive a value is, the more favourable the original interaction is.

| tetrazole                                       | $\Delta G(253\text{K})$ | $\Delta E$ | $\Delta E_{\text{opt}}$ | $\Delta G$ |
|-------------------------------------------------|-------------------------|------------|-------------------------|------------|
| (1 <i>S</i> ,2 <i>R</i> ) ( <i>cis</i> major)   | 9.3                     | 7.2        | 6.3                     | -2.8       |
| (1 <i>S</i> ,2 <i>S</i> ) ( <i>trans</i> major) | 13.2                    | 5.2        | 4.0                     | -4.6       |
| (1 <i>R</i> ,2 <i>S</i> ) ( <i>cis</i> minor)   | 15.2                    | -1.0       | -0.6                    | -8.3       |
| (1 <i>R</i> ,2 <i>R</i> ) ( <i>trans</i> minor) | 16.2                    | 6.5        | 1.2                     | -2.7       |
| pyrrolidine                                     | $\Delta G(253\text{K})$ | $\Delta E$ | $\Delta E_{\text{opt}}$ | $\Delta G$ |
| (1 <i>S</i> ,2 <i>R</i> ) ( <i>cis</i> major)   | 9.3                     | 11.0       | 6.1                     | 4.1        |
| (1 <i>S</i> ,2 <i>S</i> ) ( <i>trans</i> major) | 13.2                    | 9.3        | 4.3                     | 2.5        |
| (1 <i>R</i> ,2 <i>S</i> ) ( <i>cis</i> minor)   | 15.2                    | 7.7        | -0.5                    | -1.6       |
| (1 <i>R</i> ,2 <i>R</i> ) ( <i>trans</i> minor) | 16.2                    | 8.5        | 0.5                     | 1.9        |

The data presented in Table S19 underlines the strong H-bonding in the structures (seen in electronic energy), which is the most advanced in the (1*S*,2*R*) path. The pyrrolidine ring's conformation also favours the major product's structure.

## Intermediates

As depicted in Figure 4b in the main text, we envisioned three intermediates between the two investigated steps. Even in polar medium, the zwitterionic intermediate **1c** is hard to localize as a stationary structure, the most stable geometry corresponded to 5.5 kcal/mol in the same reference as shown in Figure 4c in the main text, therefore intermediate **1c** is ignored in further discussion.

The 4-membered ring formation leads to intermediate **1d** also dubbed as CB intermediate. The *cis*-**1d** structures are quite stable, they serve as the resting state of the catalyst in the studied cycle. On the contrary, the *trans*-**1d** intermediate is rather unstable due to extreme ring strain (Figure S24).

Intermediate **1e** or OO, forms a six-membered ring bridging by the nitro group to the formed iminium. This intermediate is available for all diastereomers and provides basis for

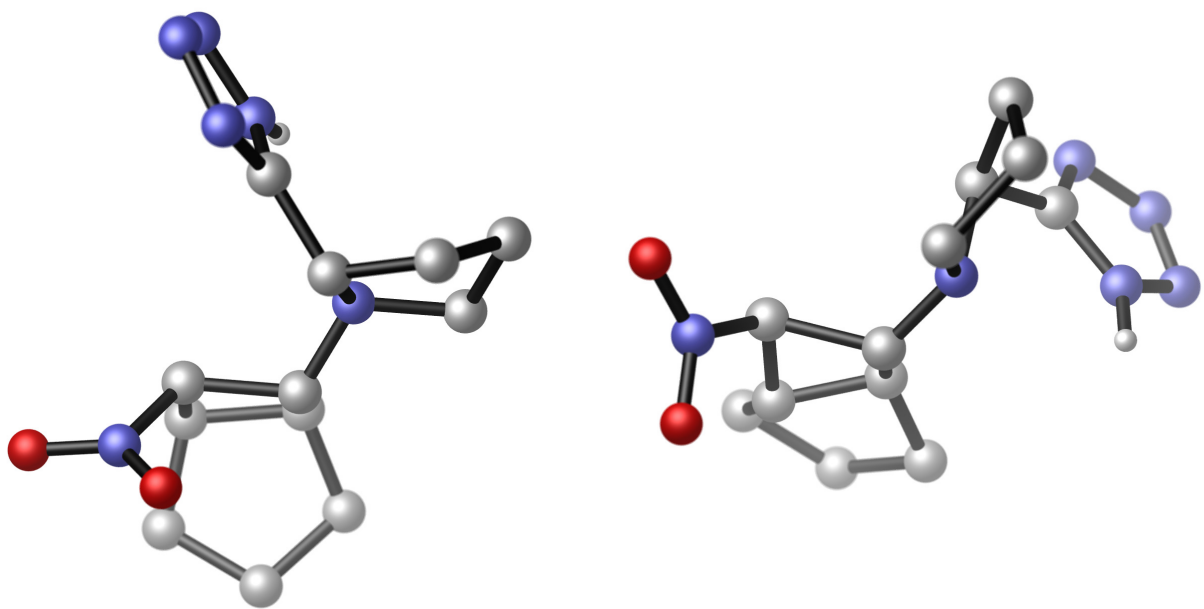

Figure S24: **left**: geometry of the most stable intermediate (*1S,2R*)-**1d**. **right**: twisted four-membered ring in (*1S,2S*)-**1d**, resulting in an unstable structure.

the subsequent protonation step.



## Foldamer Conformers

The identified 55 conformers have been processed with DFT as detailed above, apart from the electronic energy calculations with larger basis set. Apart from conformer 23 and 27, all have been optimised to a local minimum according to the vibrational frequencies.

Table S20: DFT data for the foldamer conformers, energies shown in hartree, relative free energies ( $\Delta G$ ) are in kcal/mol.

| conf | $E$            | $G_{\text{therm}}$ | $G_{\text{CDCl}_3}$ | $\Delta G$ | Pop% |
|------|----------------|--------------------|---------------------|------------|------|
| 2    | -2644.68699609 | -2643.728544       | -2644.73530155      | 0.0        | 40.4 |
| 1    | -2644.69218238 | -2643.731061       | -2644.73791821      | 0.0        | 38.3 |
| 3    | -2644.69273043 | -2643.726661       | -2644.74126282      | 1.0        | 7.5  |
| 13   | -2644.69179647 | -2643.727440       | -2644.73921455      | 1.2        | 5.3  |
| 15   | -2644.68722408 | -2643.725307       | -2644.73569671      | 1.9        | 1.8  |
| 6    | -2644.68830318 | -2643.723753       | -2644.73826996      | 2.0        | 1.7  |
| 4    | -2644.69067077 | -2643.726560       | -2644.73765846      | 2.1        | 1.4  |
| 36   | -2644.68999239 | -2643.728052       | -2644.73515110      | 2.3        | 1.0  |
| 7c   | -2644.68664102 | -2643.726629       | -2644.73320216      | 2.3        | 1.0  |
| 21   | -2644.68281779 | -2643.723289       | -2644.73226715      | 2.6        | 0.6  |
| 5    | -2644.68624683 | -2643.723673       | -2644.73469509      | 3.0        | 0.3  |
| 48c  | -2644.68554976 | -2643.725689       | -2644.73185672      | 3.0        | 0.3  |
| 19   | -2644.68489999 | -2643.724086       | -2644.73242209      | 3.3        | 0.2  |
| 9    | -2644.68641137 | -2643.723480       | -2644.73370708      | 3.8        | 0.1  |
| 29   | -2644.68556255 | -2643.723266       | -2644.73281774      | 4.0        | 0.1  |
| 17   | -2644.68664154 | -2643.722931       | -2644.73372975      | 4.3        | 0.0  |
| 12   | -2644.68599286 | -2643.724920       | -2644.73098164      | 4.4        | 0.0  |
| 42   | -2644.68342883 | -2643.720420       | -2644.73258366      | 4.6        | 0.0  |
| 8    | -2644.68747109 | -2643.721151       | -2644.73589490      | 4.6        | 0.0  |
| 18   | -2644.68213438 | -2643.719856       | -2644.73092248      | 5.1        | 0.0  |
| 44   | -2644.68197103 | -2643.716164       | -2644.73423200      | 5.3        | 0.0  |
| 30   | -2644.68058863 | -2643.717996       | -2644.73095954      | 5.3        | 0.0  |
| 16   | -2644.68318582 | -2643.720860       | -2644.73042529      | 5.5        | 0.0  |
| 11   | -2644.68317107 | -2643.717081       | -2644.73394925      | 5.6        | 0.0  |
| 23   | -2644.68047735 | -2643.719414       | -2644.72891948      | 5.6        | 0.0  |
| 49   | -2644.67786248 | -2643.714263       | -2644.73106703      | 5.9        | 0.0  |
| 33c  | -2644.68181786 | -2643.720704       | -2644.72821781      | 6.1        | 0.0  |
| 10   | -2644.68840009 | -2643.721717       | -2644.73344859      | 6.3        | 0.0  |
| 14   | -2644.6871915  | -2643.721810       | -2644.73188780      | 6.5        | 0.0  |
| 55   | -2644.67456623 | -2643.714100       | -2644.72646804      | 6.8        | 0.0  |
| 38   | -2644.67866302 | -2643.716416       | -2644.72806146      | 6.9        | 0.0  |
| 45   | -2644.68465842 | -2643.720296       | -2644.73015004      | 6.9        | 0.0  |
| 39   | -2644.67931606 | -2643.718411       | -2644.72658773      | 7.0        | 0.0  |
| 34   | -2644.67954929 | -2643.716430       | -2644.72874308      | 7.0        | 0.0  |
| 51   | -2644.68007288 | -2643.716644       | -2644.72876918      | 7.2        | 0.0  |
| 41   | -2644.67989286 | -2643.715497       | -2644.72957564      | 7.3        | 0.0  |
| 47   | -2644.66677457 | -2643.708734       | -2644.72214856      | 8.0        | 0.0  |
| 20   | -2644.68387582 | -2643.715650       | -2644.73180148      | 8.3        | 0.0  |
| 22c  | -2644.68603818 | -2643.719605       | -2644.72995857      | 8.4        | 0.0  |
| 25   | -2644.68093092 | -2643.717417       | -2644.72703656      | 8.4        | 0.0  |

|     |                |              |                |      |     |
|-----|----------------|--------------|----------------|------|-----|
| 31  | -2644.6822678  | -2643.717565 | -2644.72820256 | 8.4  | 0.0 |
| 53  | -2644.66985637 | -2643.709825 | -2644.72308257 | 8.7  | 0.0 |
| 26  | -2644.6848354  | -2643.718215 | -2644.72934691 | 8.9  | 0.0 |
| 35c | -2644.67599832 | -2643.715935 | -2644.72274123 | 8.9  | 0.0 |
| 54  | -2644.67203954 | -2643.711219 | -2644.72328760 | 9.0  | 0.0 |
| 40  | -2644.6704656  | -2643.711772 | -2644.72102136 | 9.1  | 0.0 |
| 27  | -2644.67571738 | -2643.711273 | -2644.72530966 | 10.0 | 0.0 |
| 37  | -2644.67493904 | -2643.710936 | -2644.72473439 | 10.1 | 0.0 |
| 24  | -2644.67310522 | -2643.708253 | -2644.72551838 | 10.2 | 0.0 |
| 43  | -2644.67452023 | -2643.711053 | -2644.72389976 | 10.3 | 0.0 |
| 28  | -2644.67252849 | -2643.709870 | -2644.72160322 | 11.2 | 0.0 |
| 46  | -2644.66888856 | -2643.706041 | -2644.72114960 | 11.6 | 0.0 |
| 32  | -2644.67932466 | -2643.713084 | -2644.72421571 | 11.8 | 0.0 |
| 50  | -2644.67477119 | -2643.709797 | -2644.72271710 | 12.0 | 0.0 |
| 52  | -2644.66830324 | -2643.703964 | -2644.71972771 | 13.5 | 0.0 |

In order to show that the computational ensemble conforms the NMR data, the distances originally obtained from the NOESY data are plotted against the original constrains. Note that while in the original Monte-Carlo conformational search, these constrains were in place, but there **were not** during DFT optimization.

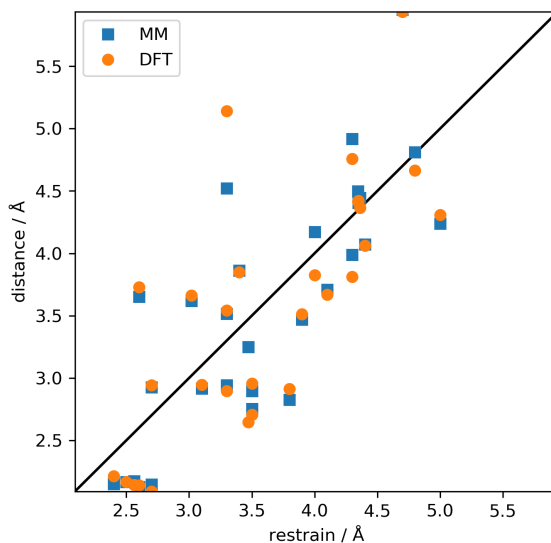

Figure S25: Distances for conformer 2.

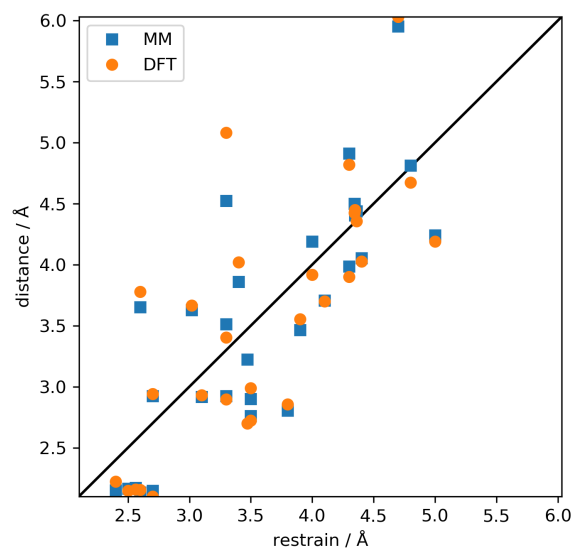

Figure S26: Distances for conformer 1.

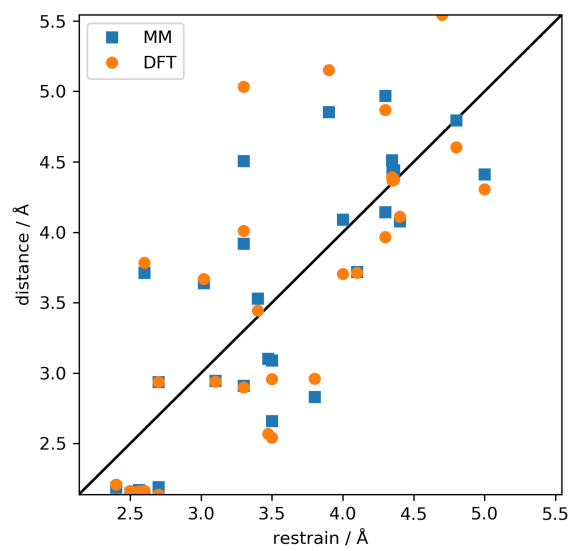

Figure S27: Distances for conformer 3.

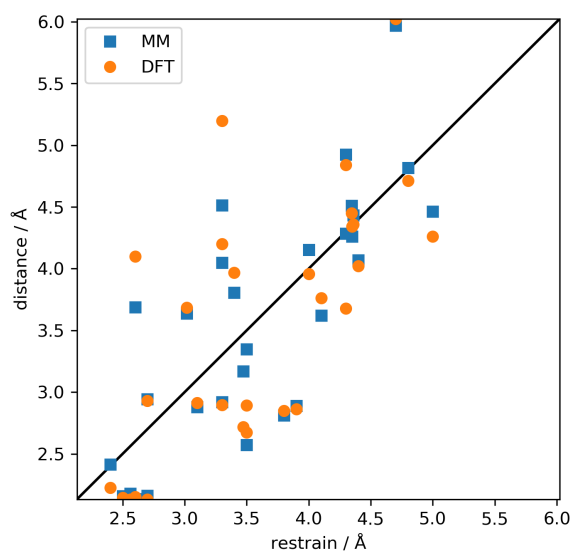

Figure S28: Distances for conformer 13.

Table S21: Weighted average dihedral angles for the 9 lowest energy foldamer conformers of **21**.

| conf:             | conf1         | conf1 x pop. | conf2         | conf2 x pop. | conf3        | conf3 x pop. | conf4        | conf4 x pop. |
|-------------------|---------------|--------------|---------------|--------------|--------------|--------------|--------------|--------------|
| <b>Residue 1</b>  |               |              |               |              |              |              |              |              |
| phi               | 44            | 16.97        | 69            | 28.04        | -139         | -10.48       | 133          | 1.88         |
| theta             | 38            | 14.75        | 52            | 21.03        | -63          | -4.70        | 54           | 0.77         |
| zeta              | 46            | 17.58        | 41            | 16.58        | -17          | -1.29        | 36           | 0.50         |
| psi               | -108          | -41.57       | -100          | -40.83       | -108         | -8.12        | -142         | -2.00        |
| <b>Residue 2</b>  |               |              |               |              |              |              |              |              |
| phi               | -68           | 0.00         | -76           | 0.00         | -83          | 0.00         | -78          | 0.00         |
| psi               | 134           | -26.03       | 130           | -30.73       | 131          | -6.25        | 154          | -1.09        |
| <b>Residue 3</b>  |               |              |               |              |              |              |              |              |
| phi               | 61            | 51.72        | 64            | 52.73        | 57           | 9.87         | 55           | 2.17         |
| theta             | 44            | 0.00         | 45            | 0.00         | 45           | 0.00         | 36           | 0.00         |
| zeta              | 42            | 23.46        | 42            | 18.26        | 45           | 4.26         | 42           | 0.78         |
| psi               | -120          | 17.10        | -121          | 17.07        | -112         | 3.41         | -129         | 0.50         |
| <b>Residue 4</b>  |               |              |               |              |              |              |              |              |
| phi               | -72           | -46.24       | -75           | -49.24       | -81          | -8.41        | -68          | -1.82        |
| psi               | 142           | 0.00         | 145           | 0.00         | 144          | 0.00         | 144          | 0.00         |
| <b>Residue 5</b>  |               |              |               |              |              |              |              |              |
| phi               | 59            | -27.76       | 60            | -30.31       | 58           | -6.11        | 58           | -0.96        |
| theta             | 48            | 54.60        | 45            | 58.80        | 46           | 10.85        | 47           | 2.03         |
| zeta              | 29            | 0.00         | 28            | 0.00         | 30           | 0.00         | 29           | 0.00         |
| psi               | -118          | 11.54        | -124          | -50.25       | -124         | -9.30        | -118         | 0.82         |
| <b>Residue 6</b>  |               |              |               |              |              |              |              |              |
| phi               | -65           | 0.00         | -65           | 0.00         | -65          | 0.00         | -64          | 0.00         |
| psi*              | 133           | -24.86       | 152           | -26.28       | 134          | -4.88        | 133          | -0.91        |
|                   |               | 51.33        |               | 61.93        |              | 10.07        |              | 1.87         |
| <b>Population</b> | <b>38.52%</b> |              | <b>40.64%</b> |              | <b>7.52%</b> |              | <b>1.41%</b> |              |

Table S22: Weighted average dihedral angles for the 9 lowest energy foldamer conformers of **21**.

| conf:             | conf6 | conf6 x pop. | conf7c | conf7c x pop. | conf13 | conf13 x pop. | conf15 | conf15 x pop. |
|-------------------|-------|--------------|--------|---------------|--------|---------------|--------|---------------|
| <b>Residue 1</b>  |       |              |        |               |        |               |        |               |
| phi               | -138  | -2.32        | 44     | 0.43          | -98    | -5.23         | -122   | -2.17         |
| theta             | -62   | -1.05        | 35     | 0.34          | -88    | -4.70         | -60    | -1.08         |
| zeta              | -18   | -0.30        | 46     | 0.45          | 51     | 2.71          | -25    | -0.45         |
| psi               | -108  | -1.81        | -110   | -1.08         | -100   | -5.34         | -95    | -1.69         |
| <b>Residue 2</b>  |       |              |        |               |        |               |        |               |
| phi               | -82   | 0.00         |        | 0.00          |        | 0.00          |        | 0.00          |
| psi               | 131   | -1.38        | -65    | -0.64         | -76    | -4.04         | -77    | -1.37         |
| <b>Residue 3</b>  |       |              |        |               |        |               |        |               |
| phi               | 56    | 2.20         | 142    | 1.39          | 145    | 7.77          | 149    | 2.66          |
| theta             | 46    | 0.00         |        | 0.00          |        | 0.00          |        | 0.00          |
| zeta              | 46    | 0.94         | 59     | 0.57          | 61     | 3.28          | 57     | 1.02          |
| psi               | -110  | 0.77         | 41     | 0.40          | 36     | 1.93          | 37     | 0.67          |
| <b>Residue 4</b>  |       |              |        |               |        |               |        |               |
| phi               | 46    | 0.77         | 42     | 0.41          | 43     | 2.29          | 42     | 0.75          |
| psi               | -84   | -1.84        | -122   | -1.20         | -127   | -6.81         | -128   | -2.27         |
| <b>Residue 5</b>  |       |              |        |               |        |               |        |               |
| phi               | 143   | 0.00         |        | 0.00          |        | 0.00          |        | 0.00          |
| theta             | 60    | -1.42        | -71    | -0.70         | -69    | -3.67         | -70    | -1.25         |
| zeta              | 45    | 2.41         | 143    | 1.41          | 143    | 7.65          | 145    | 2.58          |
| psi               | 30    | 0.00         |        | 0.00          |        | 0.00          |        | 0.00          |
| <b>Residue 6</b>  |       |              |        |               |        |               |        |               |
| phi               | 60    | 1.01         | 59     | 0.58          | 58     | 3.13          | 58     | 1.03          |
| theta             | 45    | 0.75         | 47     | 0.46          | 48     | 2.55          | 47     | 0.84          |
| zeta              | 30    | 0.50         | 29     | 0.28          | 29     | 1.57          | 29     | 0.52          |
| psi               | -128  | -2.15        | -120   | -1.17         | -118   | -6.31         | -118   | -2.11         |
| <b>Population</b> |       |              |        |               |        |               |        |               |
| phi               | -66   | 0.00         |        | 0.00          |        | 0.00          |        | 0.00          |
| psi*              | 154   | -1.11        | -60    | -0.59         | -64    | -3.45         | -64    | -1.14         |
|                   |       | 2.58         | 131    | 1.28          | 133    | 7.11          | 133    | 2.37          |
| <b>Population</b> | 1.68% |              | 0.98%  |               | 5.35%  |               | 1.78%  |               |

Table S23: Weighted average dihedral angles for the 9 lowest energy foldamer conformers of **21**.

| conf:            | conf36 | conf36 x pop. | weighted average |
|------------------|--------|---------------|------------------|
| <b>Residue 1</b> |        |               |                  |
| phi              | -115   | -1.15         | 25.96            |
| theta            | 62     | 0.62          | 9.65             |
| zeta             | -53    | -0.53         | 35.25            |
| psi              | -60    | -0.60         | -103.04          |
| <b>Residue 2</b> |        |               |                  |
| phi              | -128   | -1.28         | -72.81           |
| psi              | -179   | -1.79         | 128.71           |
| <b>Residue 3</b> |        |               |                  |
| phi              | 64     | 0.64          | 61.11            |
| theta            | 46     | 0.46          | 43.49            |
| zeta             | 38     | 0.38          | 41.88            |
| psi              | -119   | -1.19         | -119.01          |
| <b>Residue 4</b> |        |               |                  |
| phi              | -67    | -0.67         | -72.83           |
| psi              | 142    | 1.42          | 141.74           |
| <b>Residue 5</b> |        |               |                  |
| phi              | 59     | 0.59          | 58.97            |
| theta            | 48     | 0.48          | 46.17            |
| zeta             | 29     | 0.29          | 28.44            |
| psi              | -117   | -1.17         | -119.73          |
| <b>Residue 6</b> |        |               |                  |
| phi              | -65    | -0.65         | -63.87           |
| psi*             | 132    | 1.32          | 139.87           |

Population 1.00%

## Cyclopentane ring molecular simulation

To understand why this might be the case, we performed molecular simulations at the  $\omega$ B97XD/6-311G\*\* level on the cyclopentane ring. In these calculations, it was shown that as expected, this will form an envelope conformation - i.e. one of the five ring carbons is always above or below the plane of the other four atoms. The values for  $\zeta$  vary dependent on which bond of the ring is part of the sequence. In other words, it is different for all five pseudorotation states and the cyclopentane system must therefore select one of these (Table S24).

Table S24:  $\zeta$ -Angles for the internal ring torsions of the five-membered ring envelope.

| Internal Ring Torsions | <i>cis</i>                |                           | <i>trans</i>              |                           |
|------------------------|---------------------------|---------------------------|---------------------------|---------------------------|
|                        | (1 <i>S</i> ,2 <i>R</i> ) | (1 <i>R</i> ,2 <i>S</i> ) | (1 <i>S</i> ,2 <i>S</i> ) | (1 <i>R</i> ,2 <i>R</i> ) |
| 0                      | 0                         | 0                         | 118.8                     | -118.8                    |
| -24.5                  | -30.0                     | -28.6                     | 89.8                      | -148.3                    |
| 39.9                   | 44.7                      | 45.7                      | 165.1                     | -74.7                     |
| -39.9                  | -44.8                     | -45.7                     | 74.7                      | -165.2                    |
| 24.6                   | 30.0                      | 28.8                      | 148.6                     | -89.7                     |



# Spectra

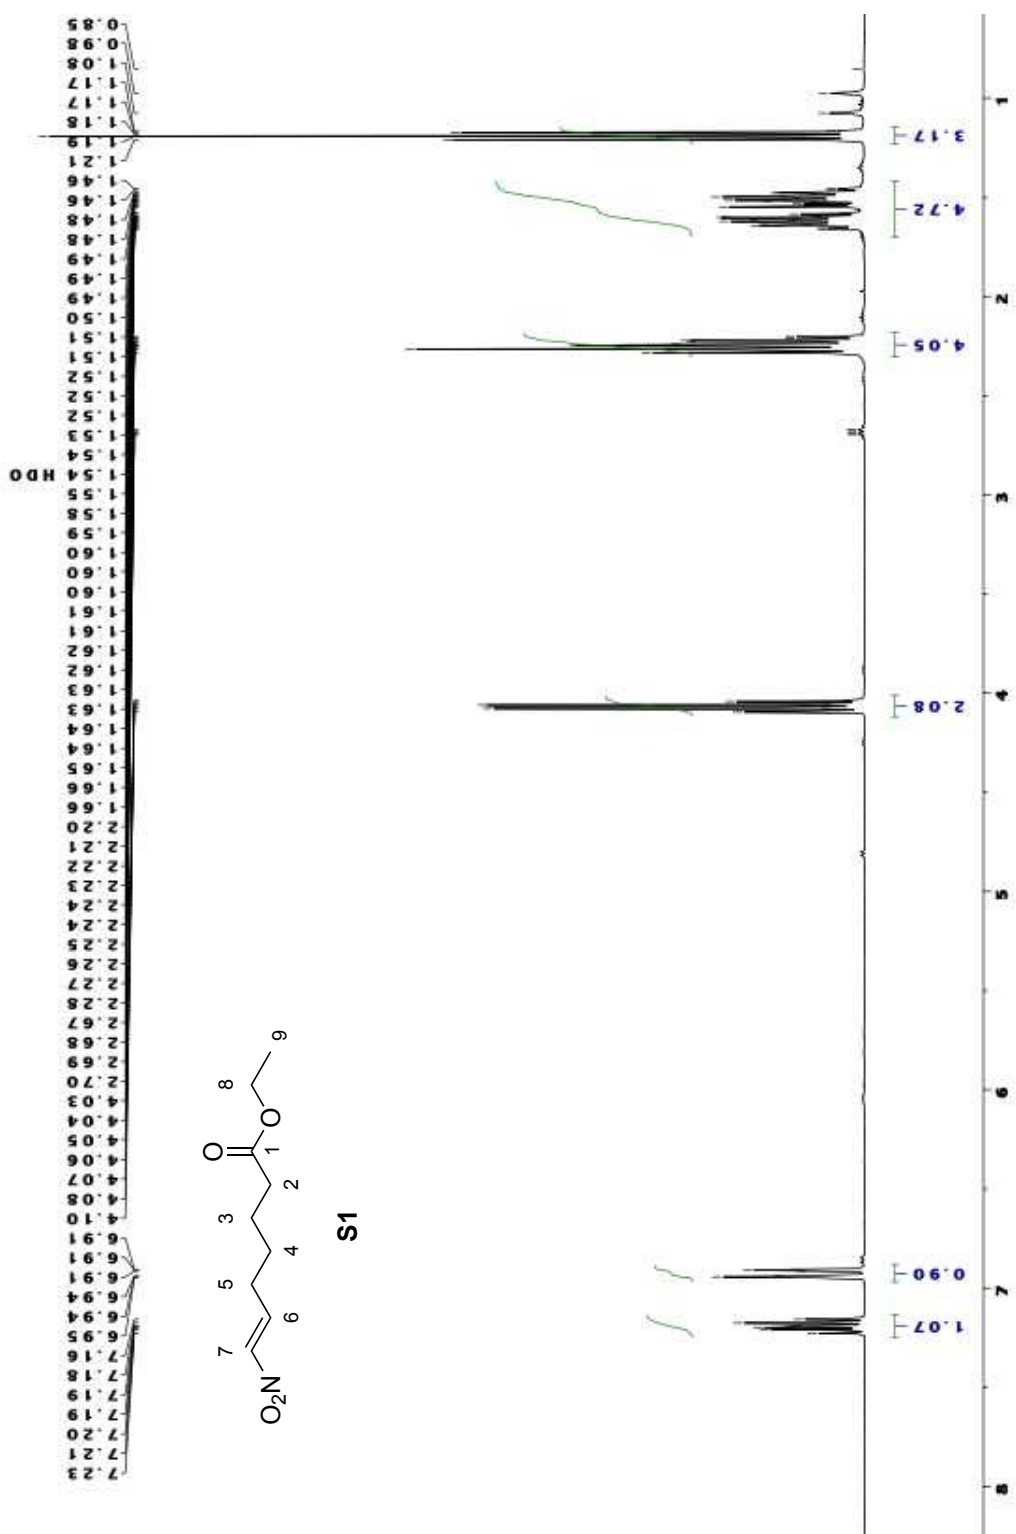

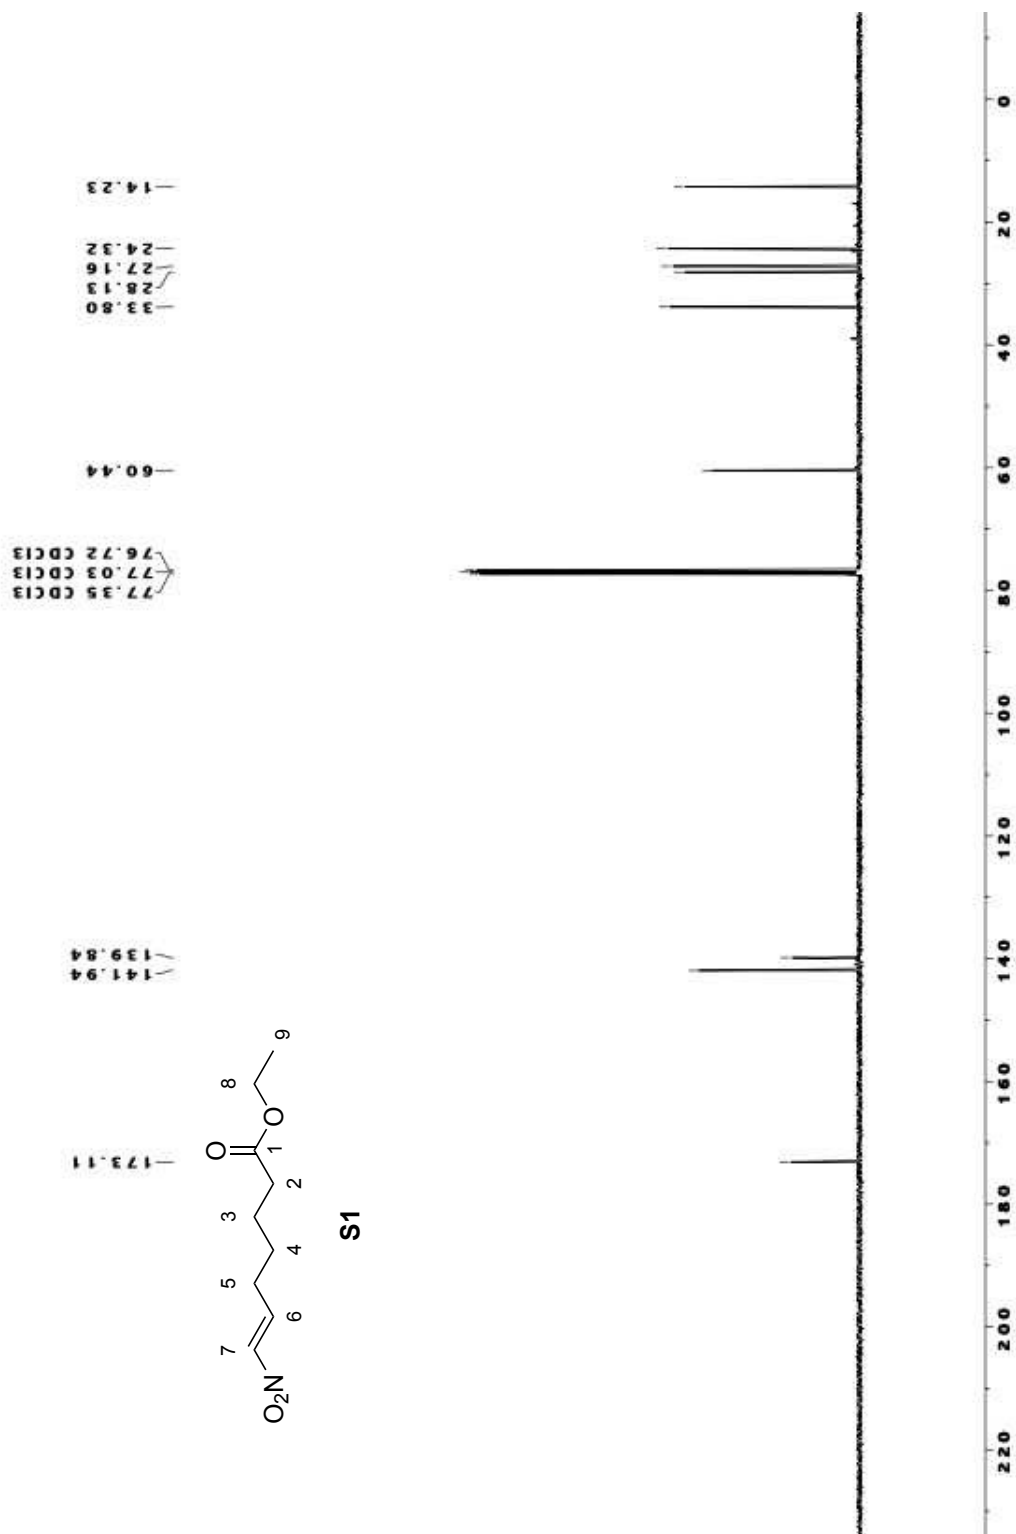

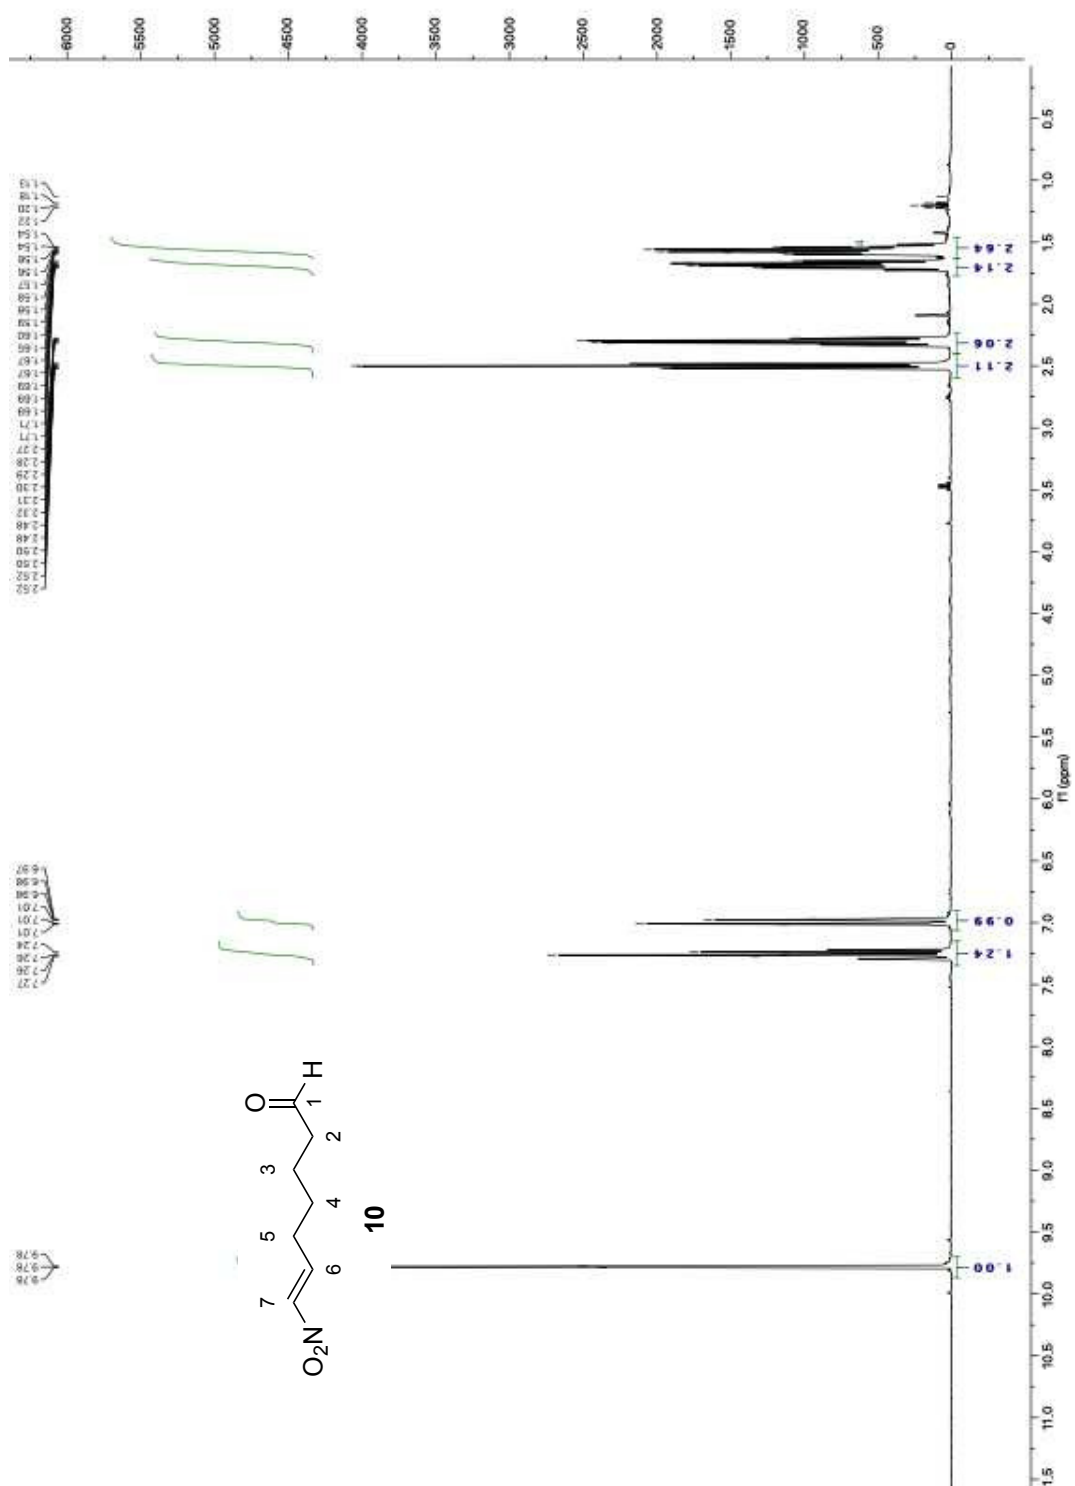

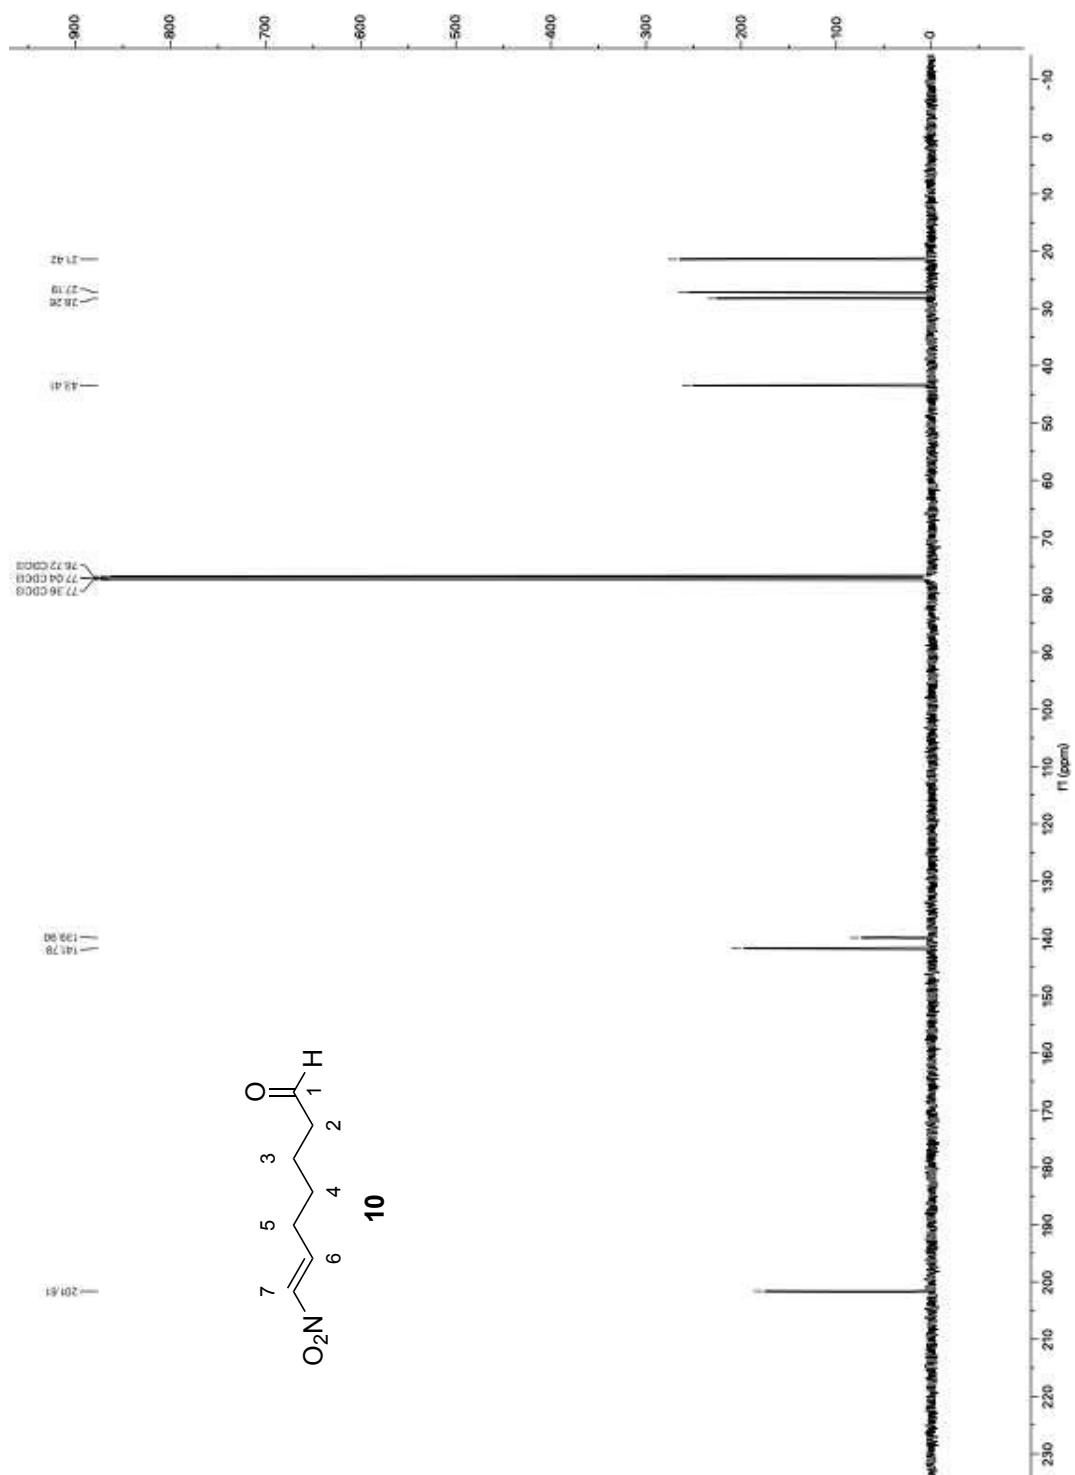

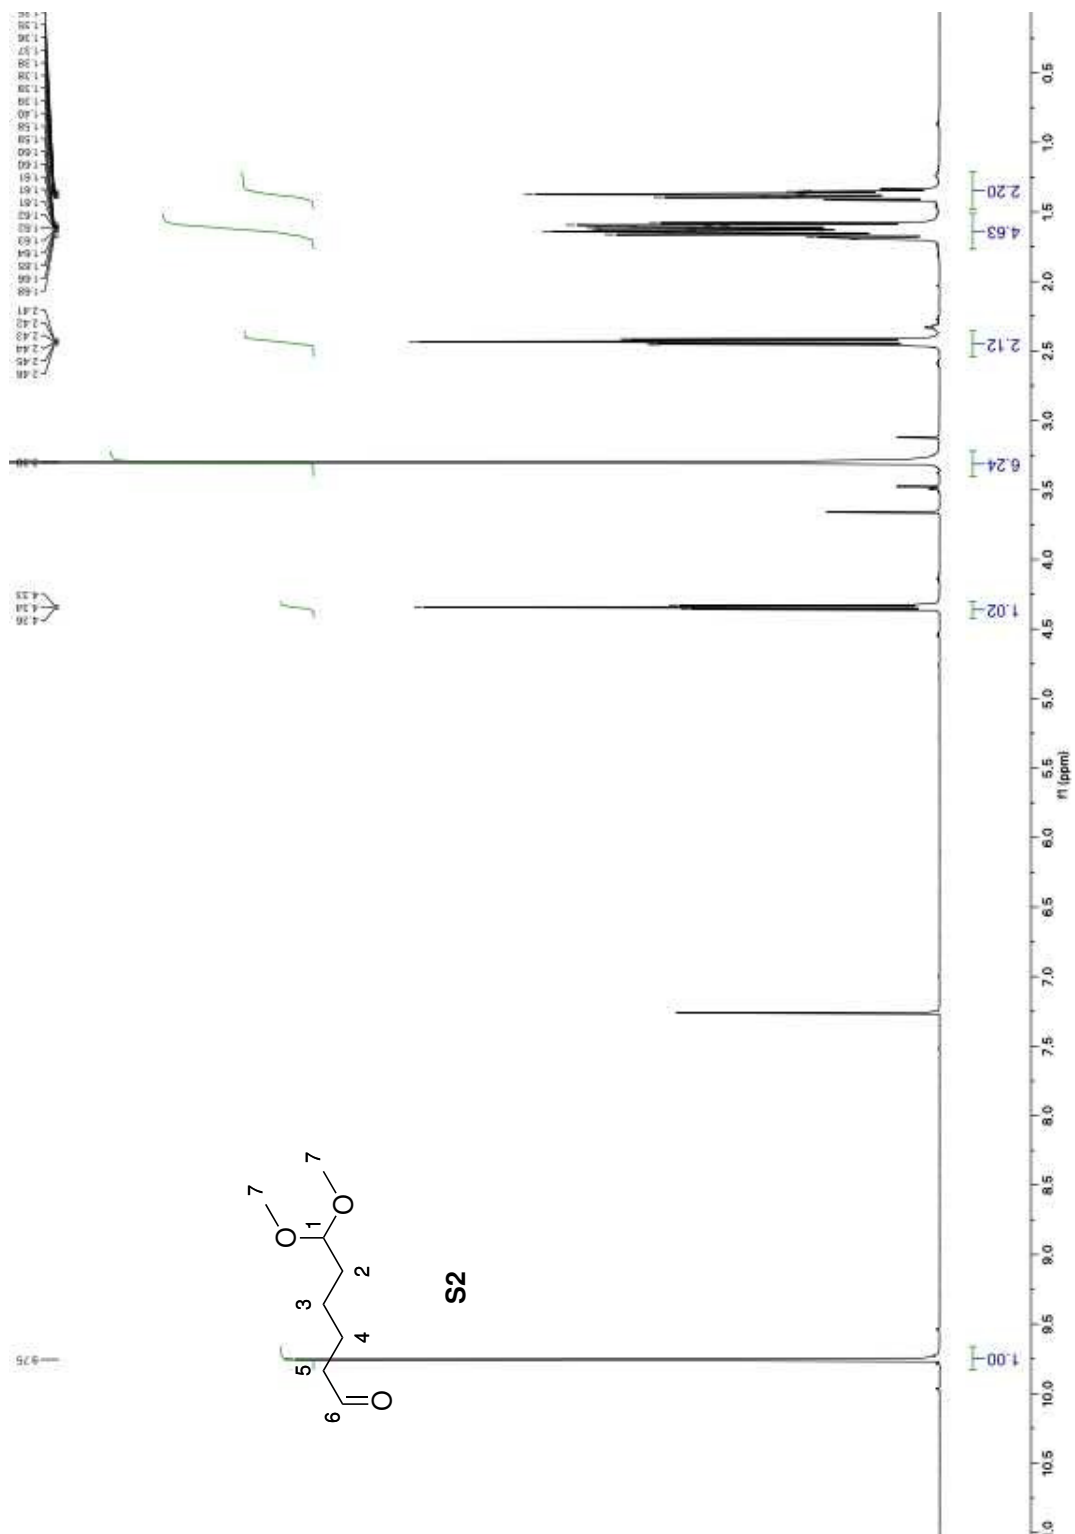

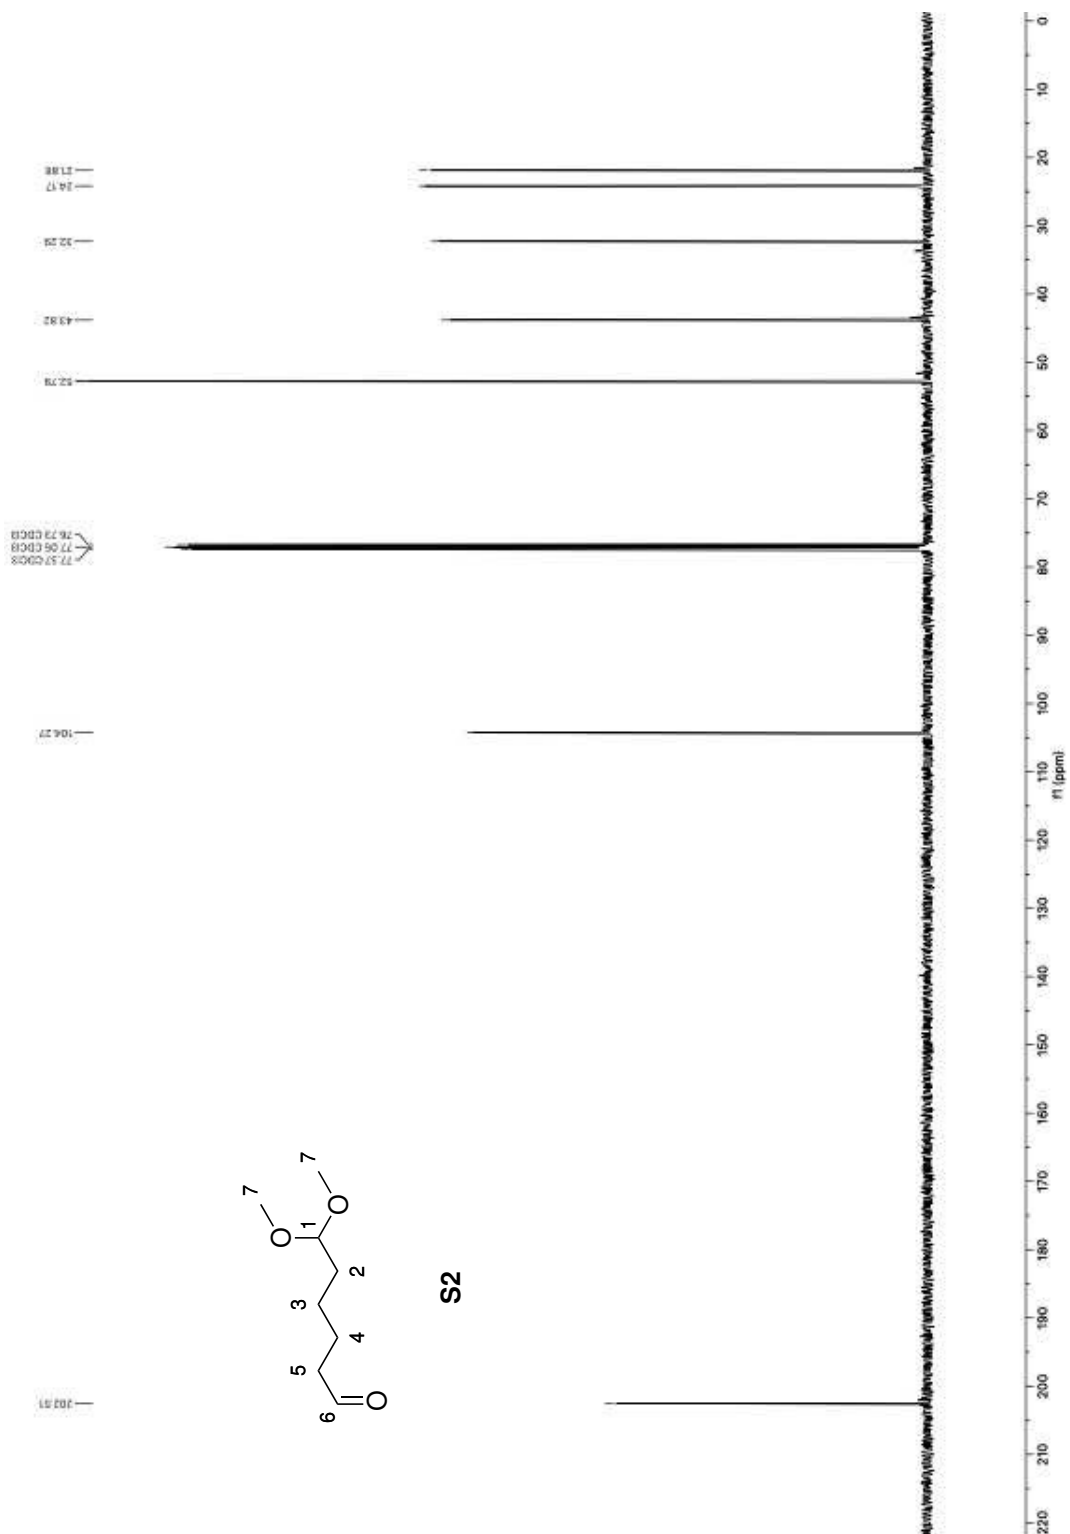

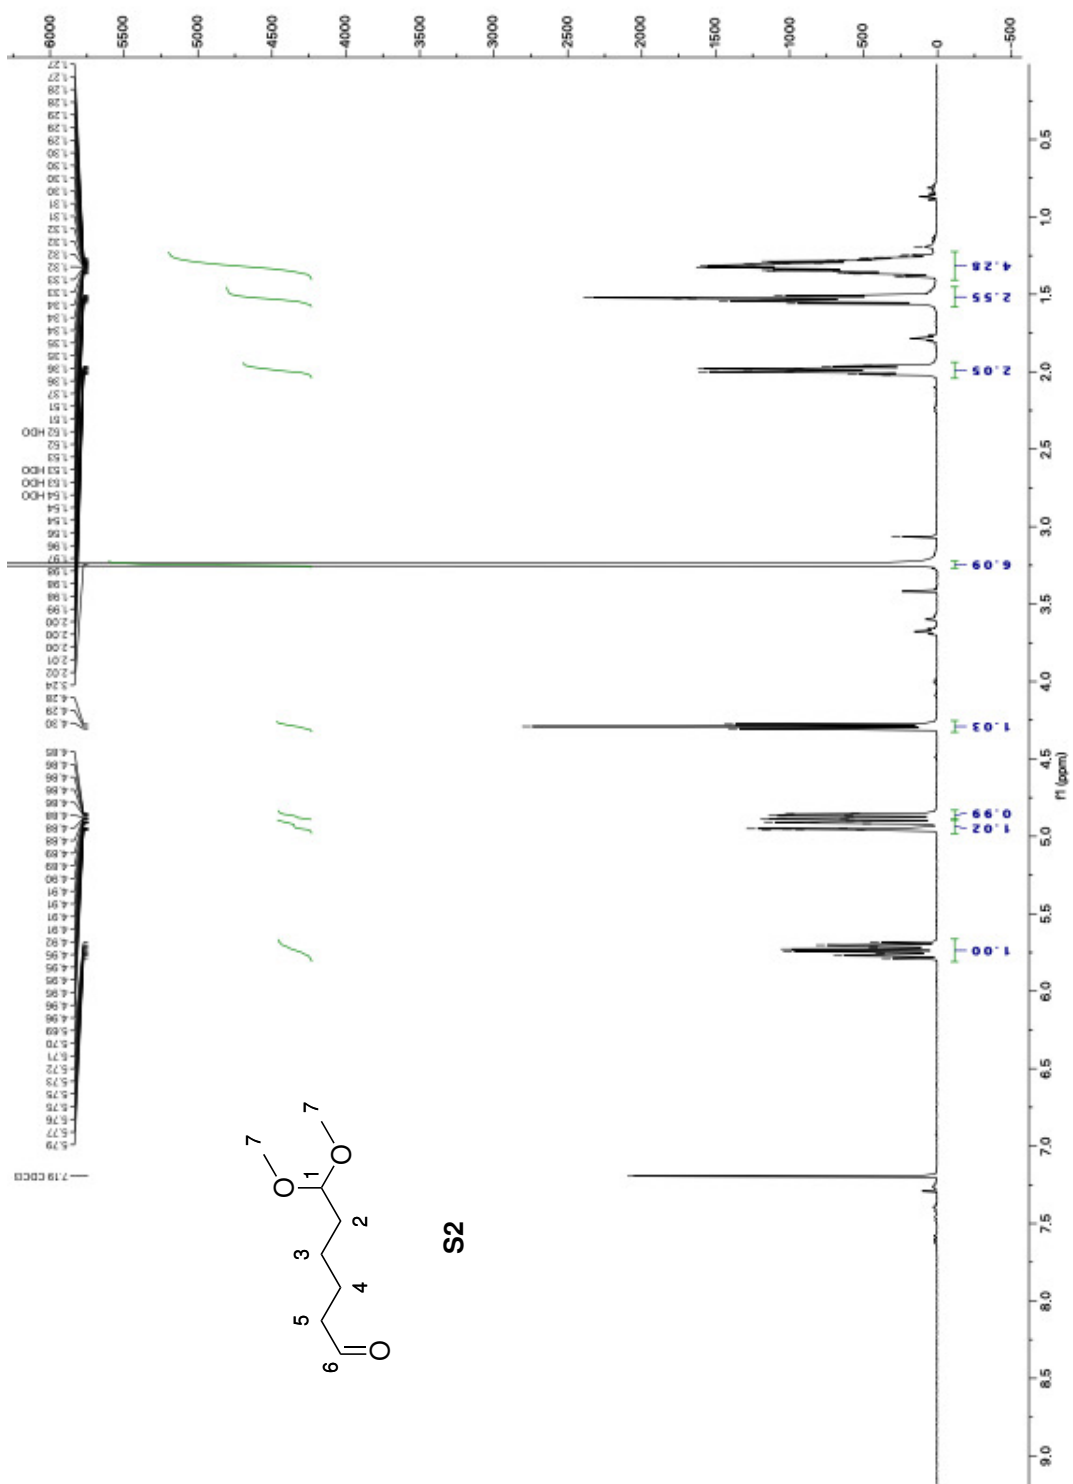

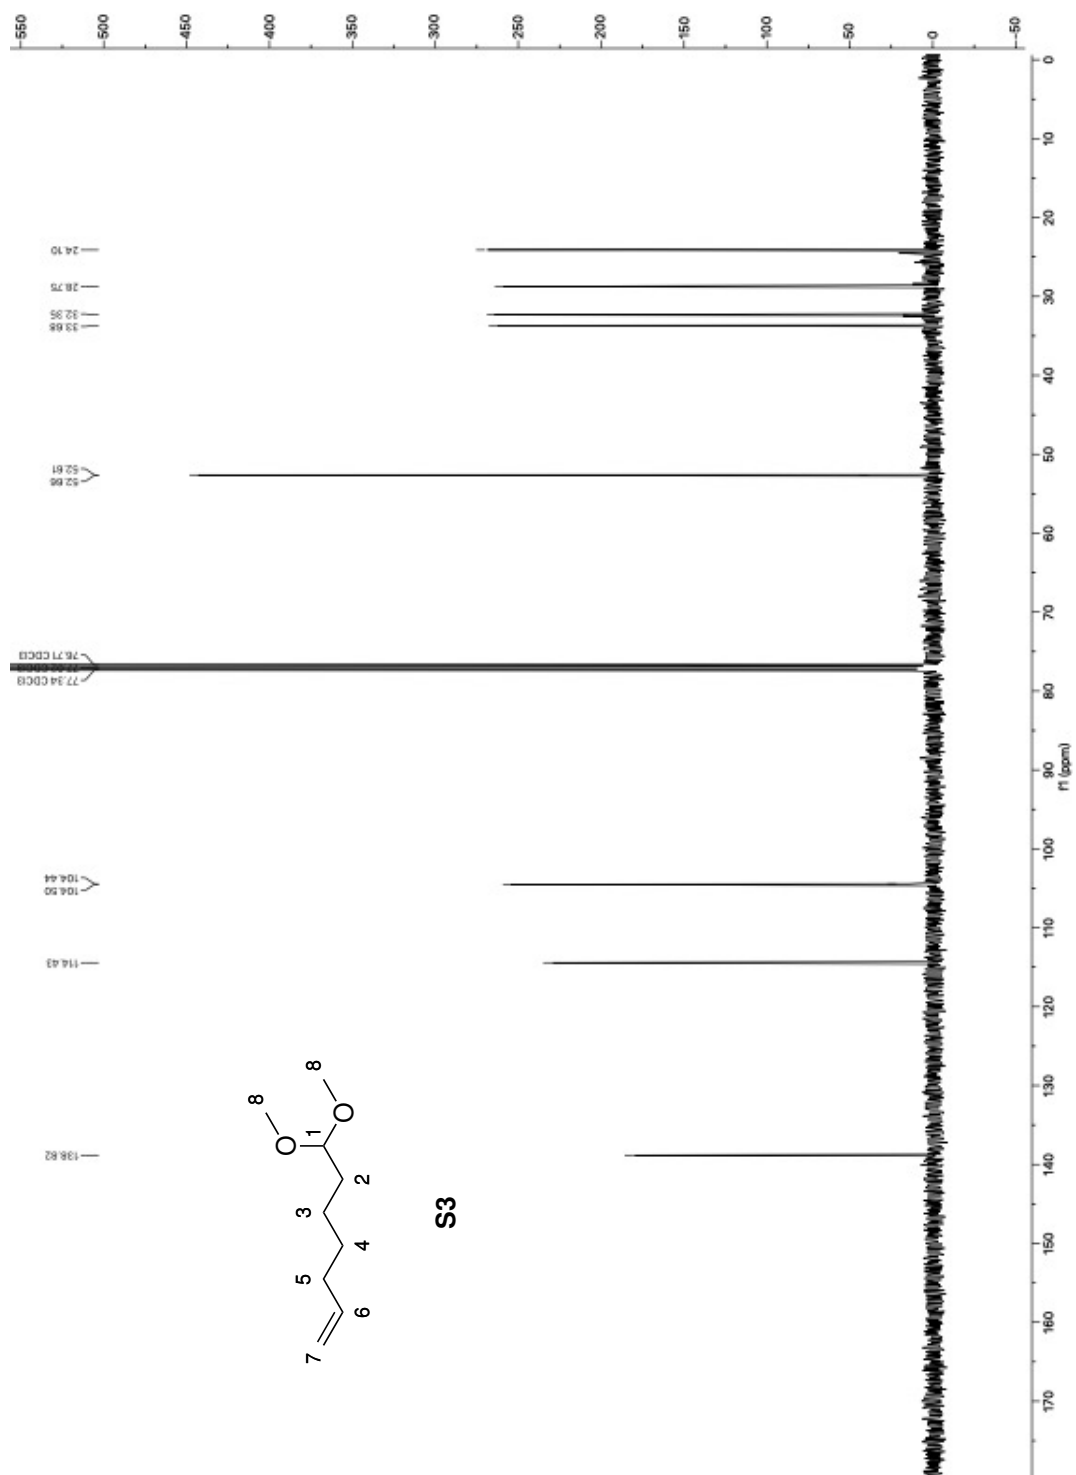



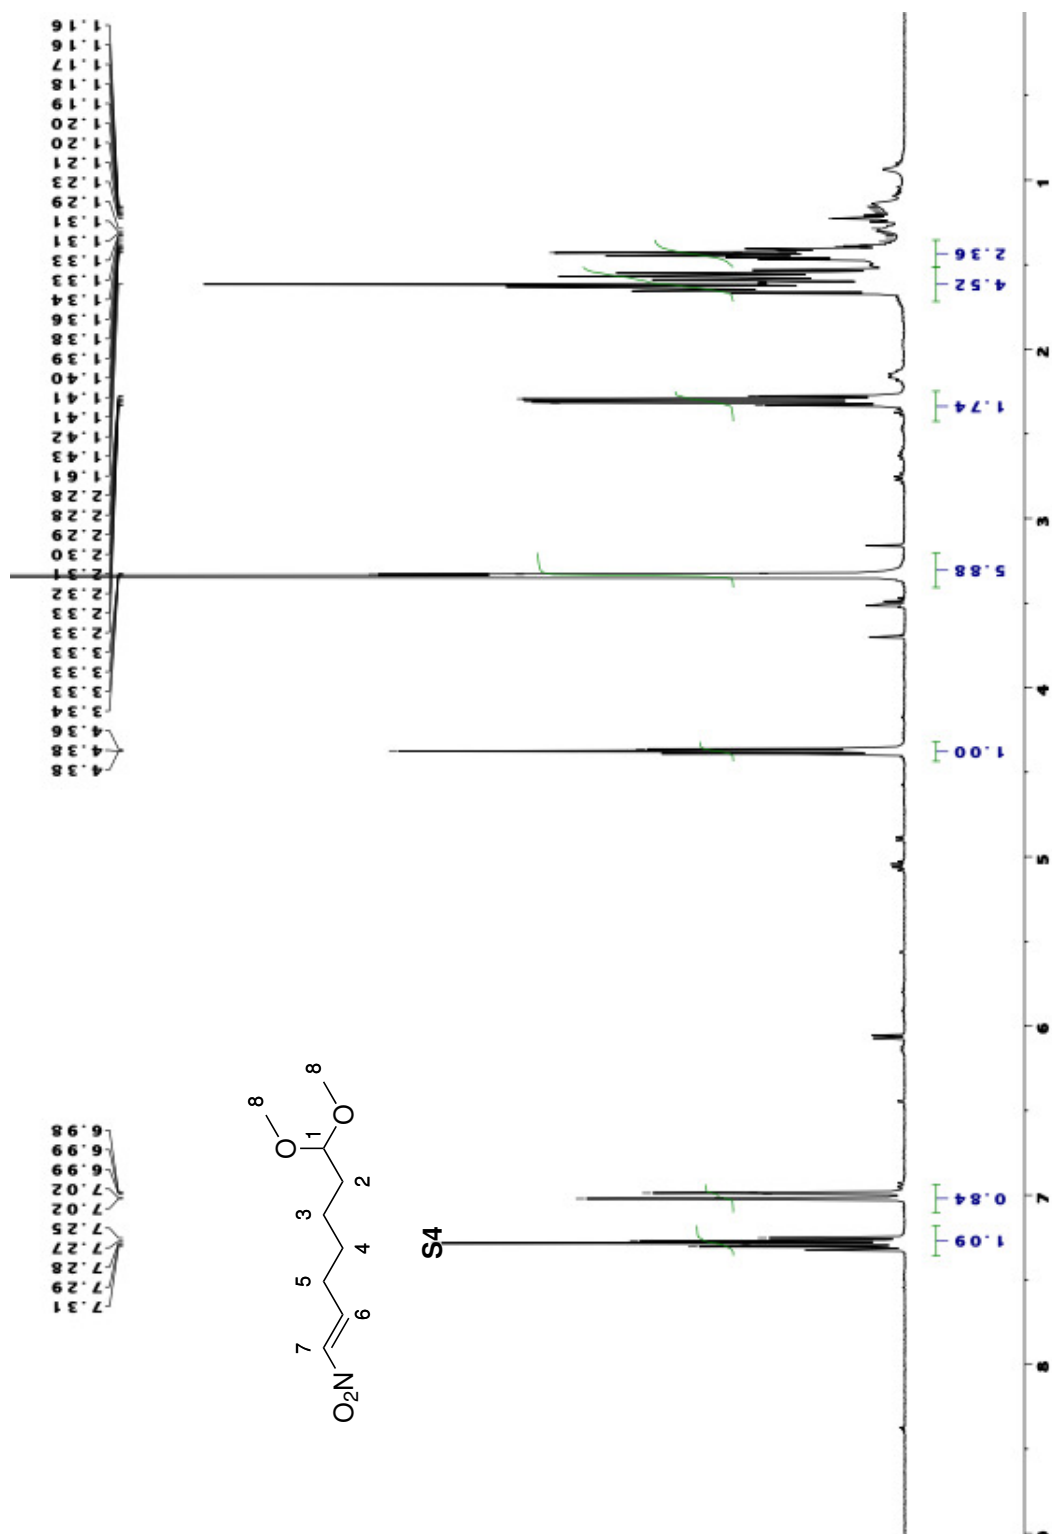

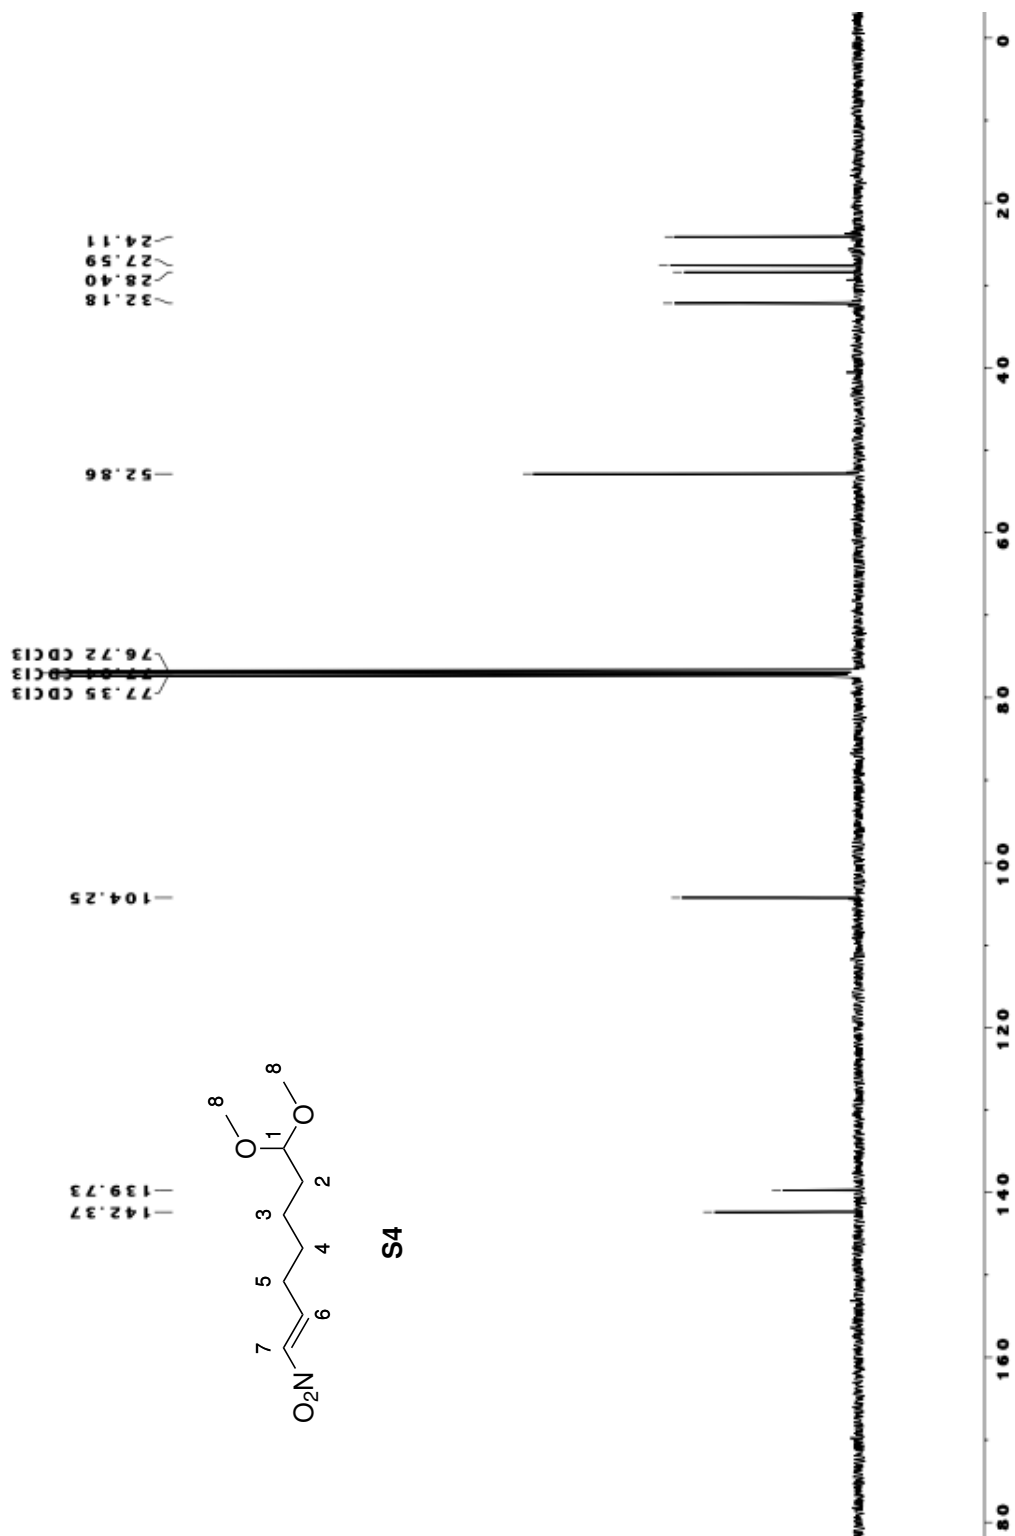

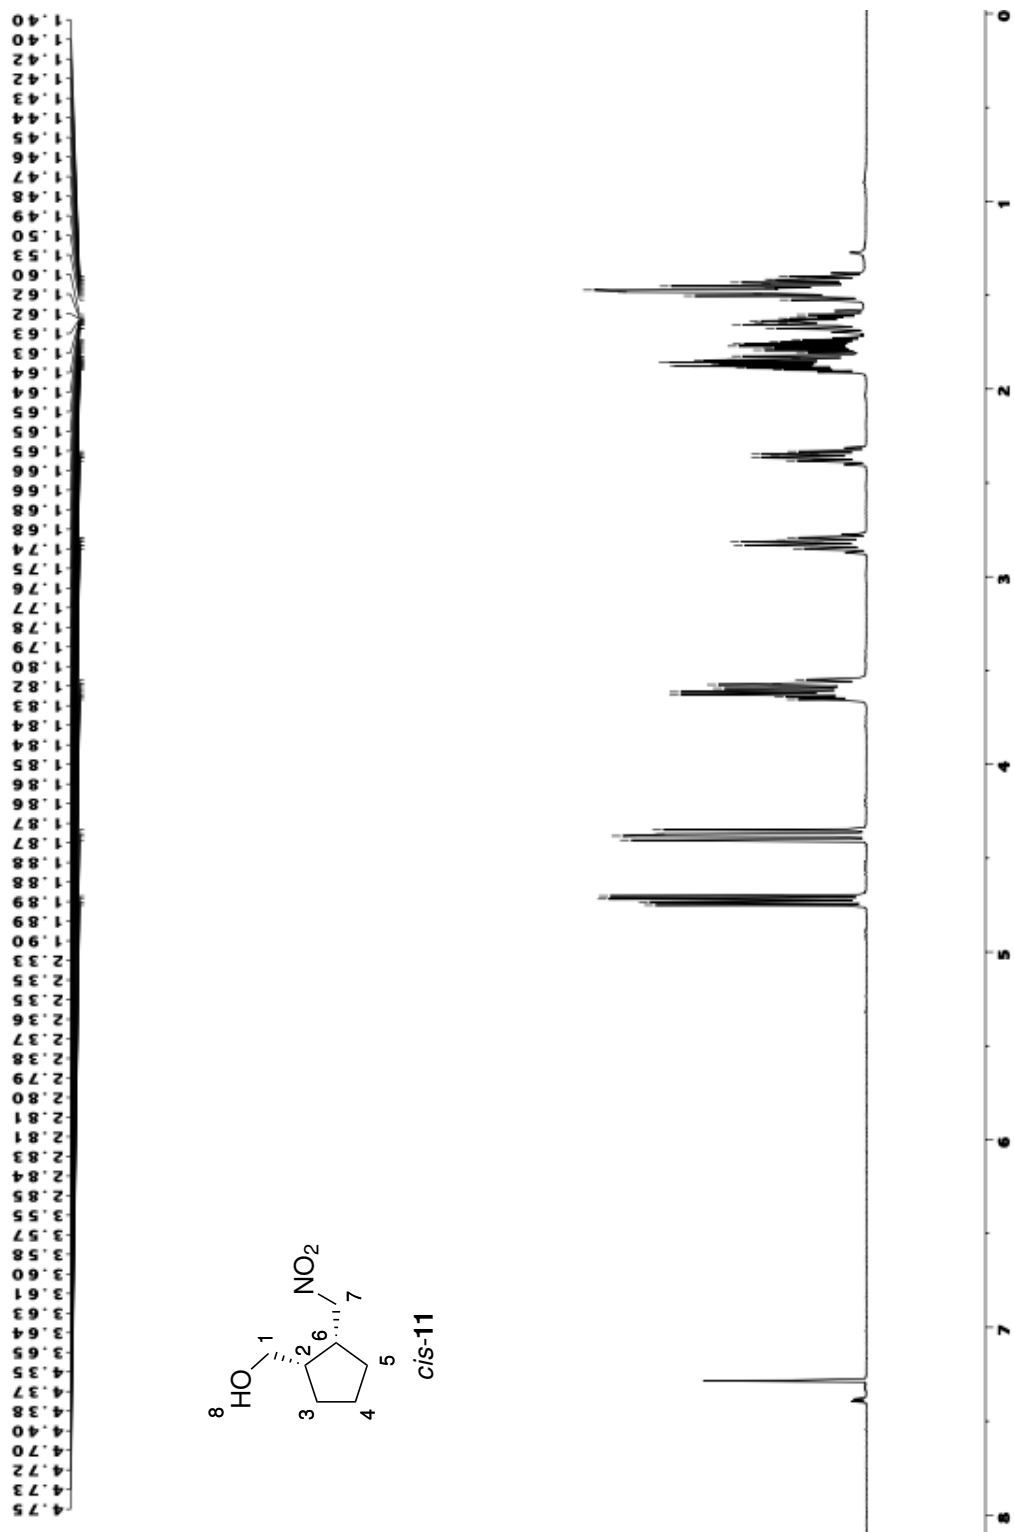

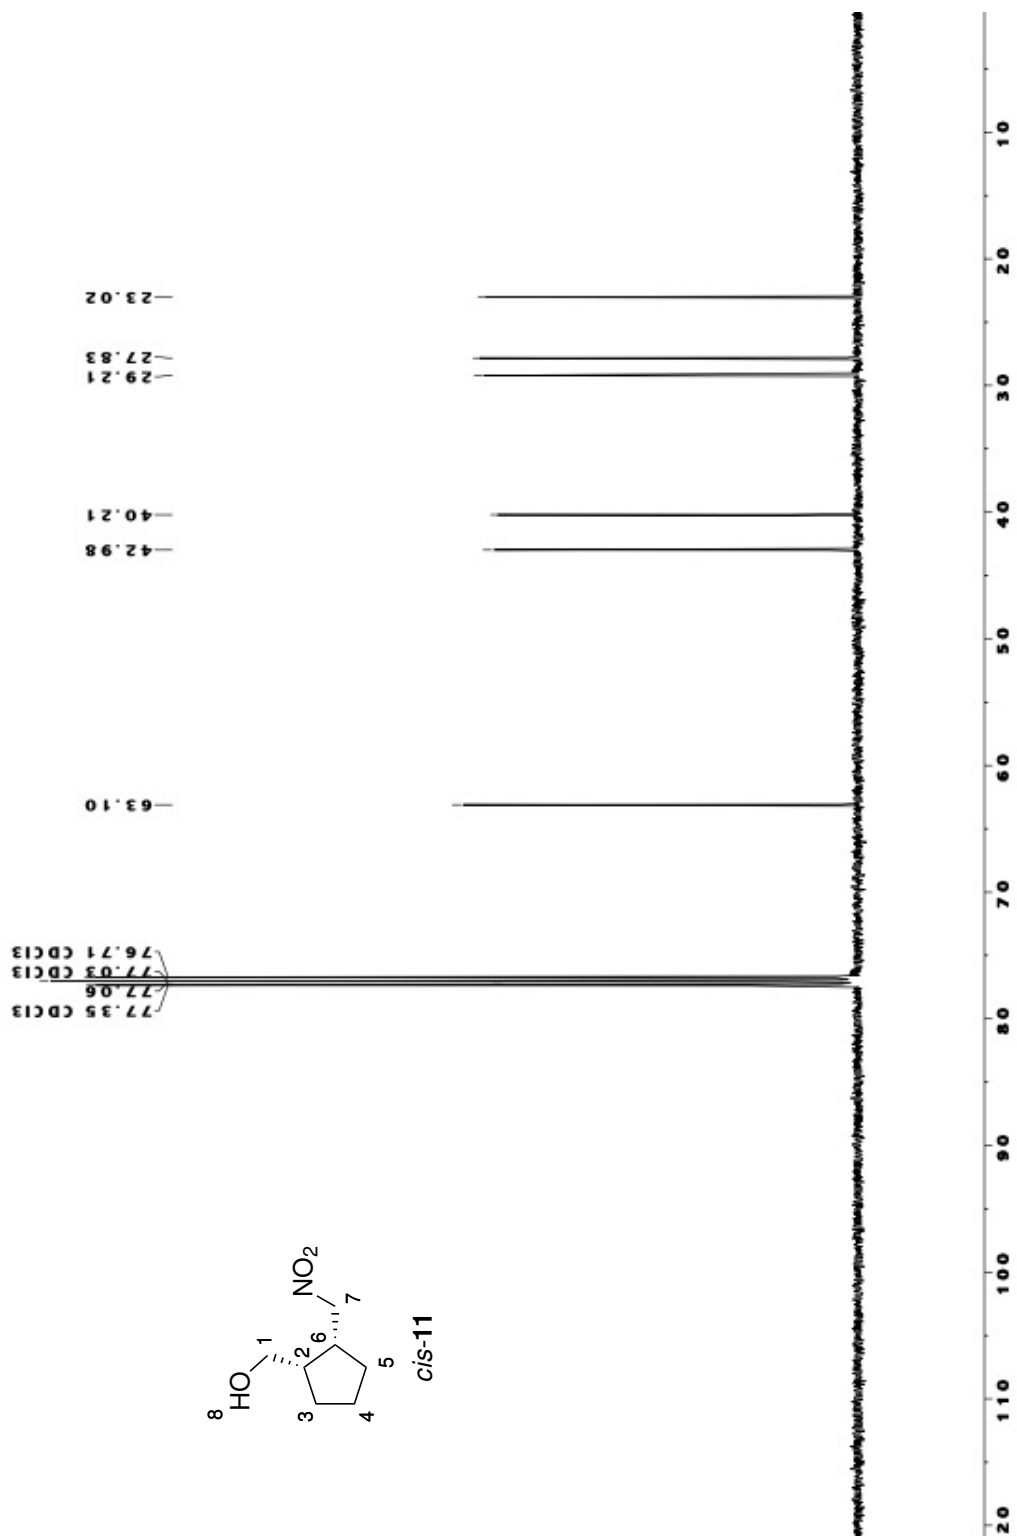

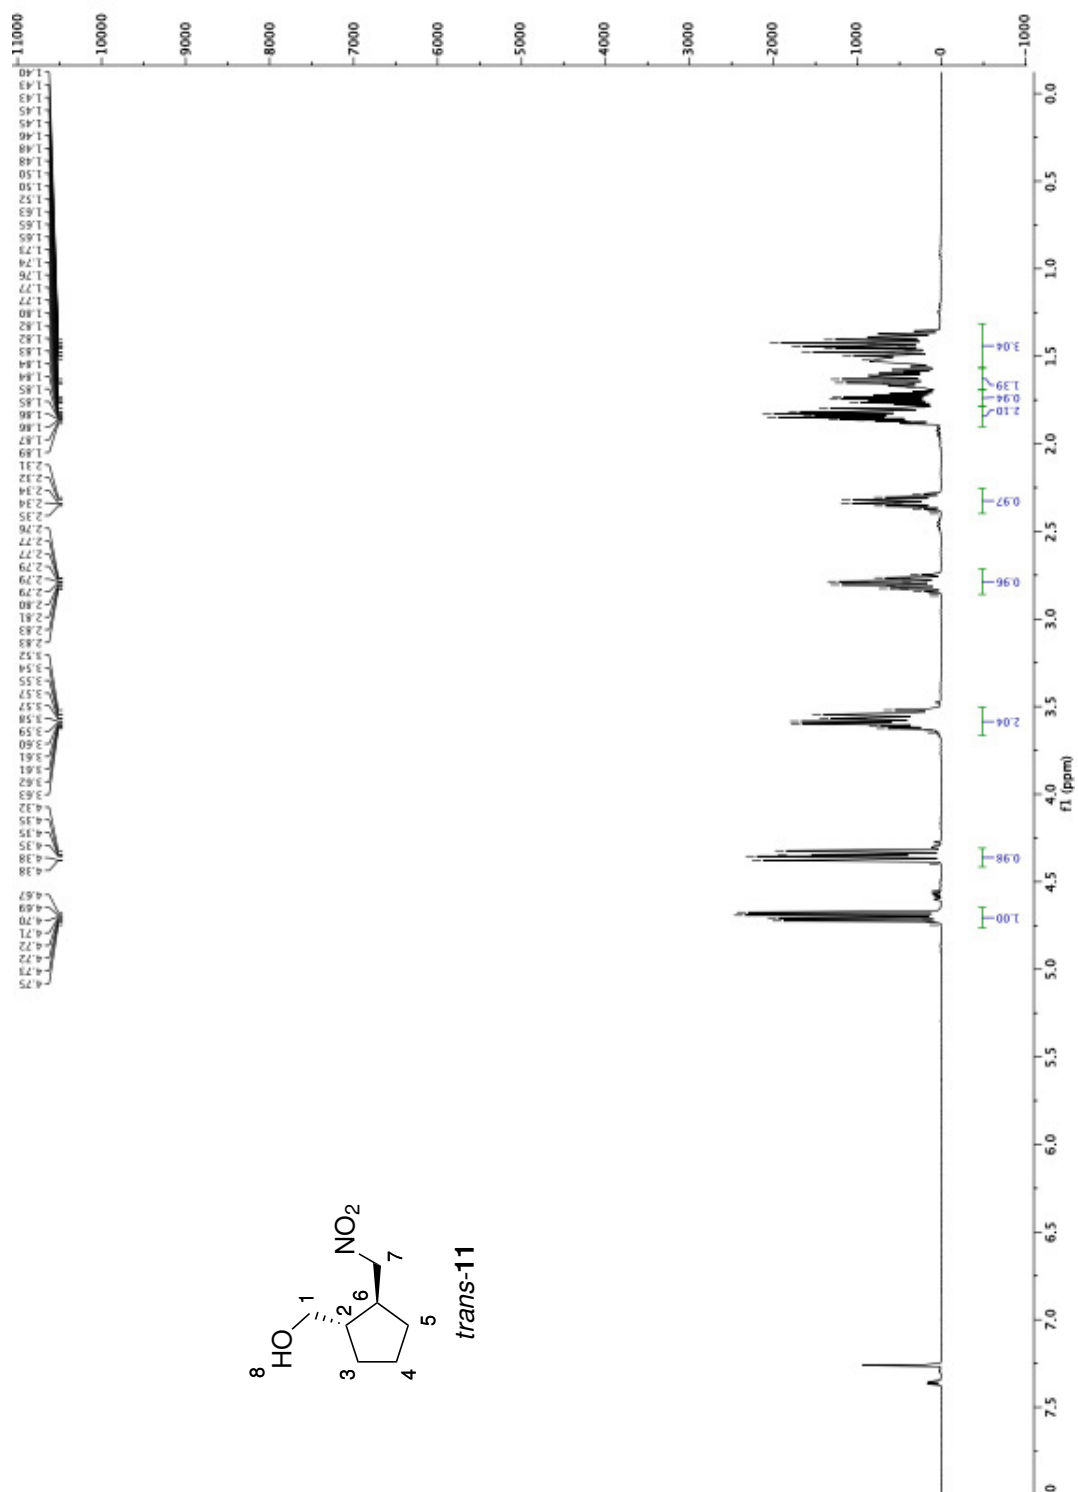

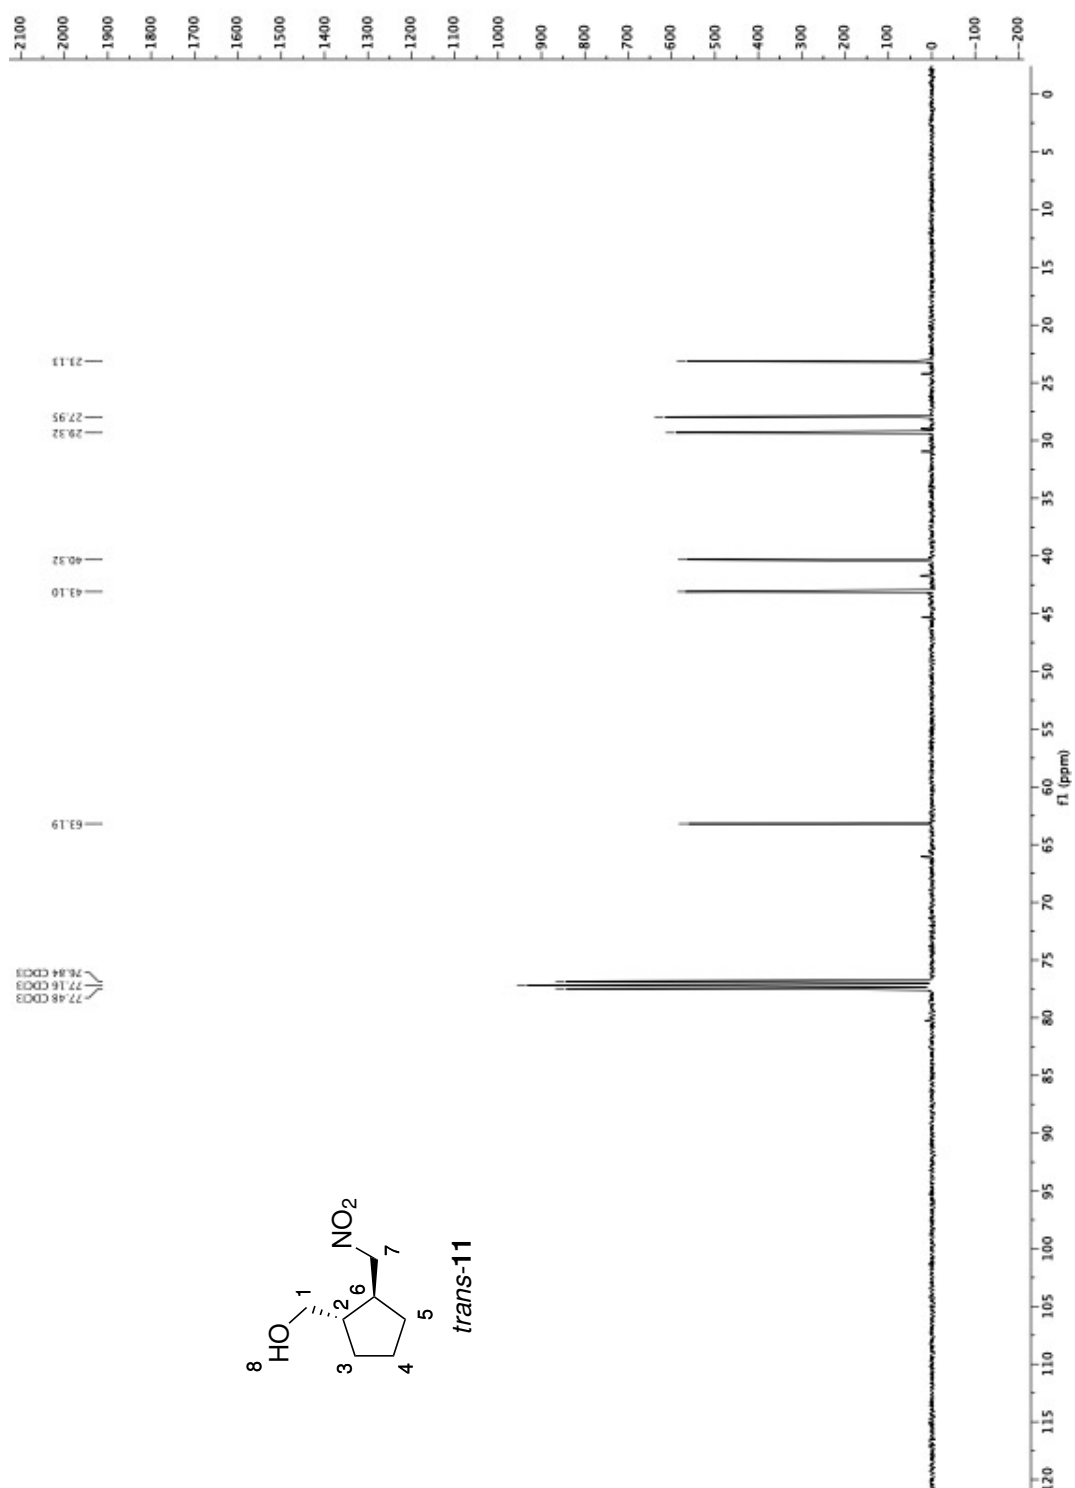

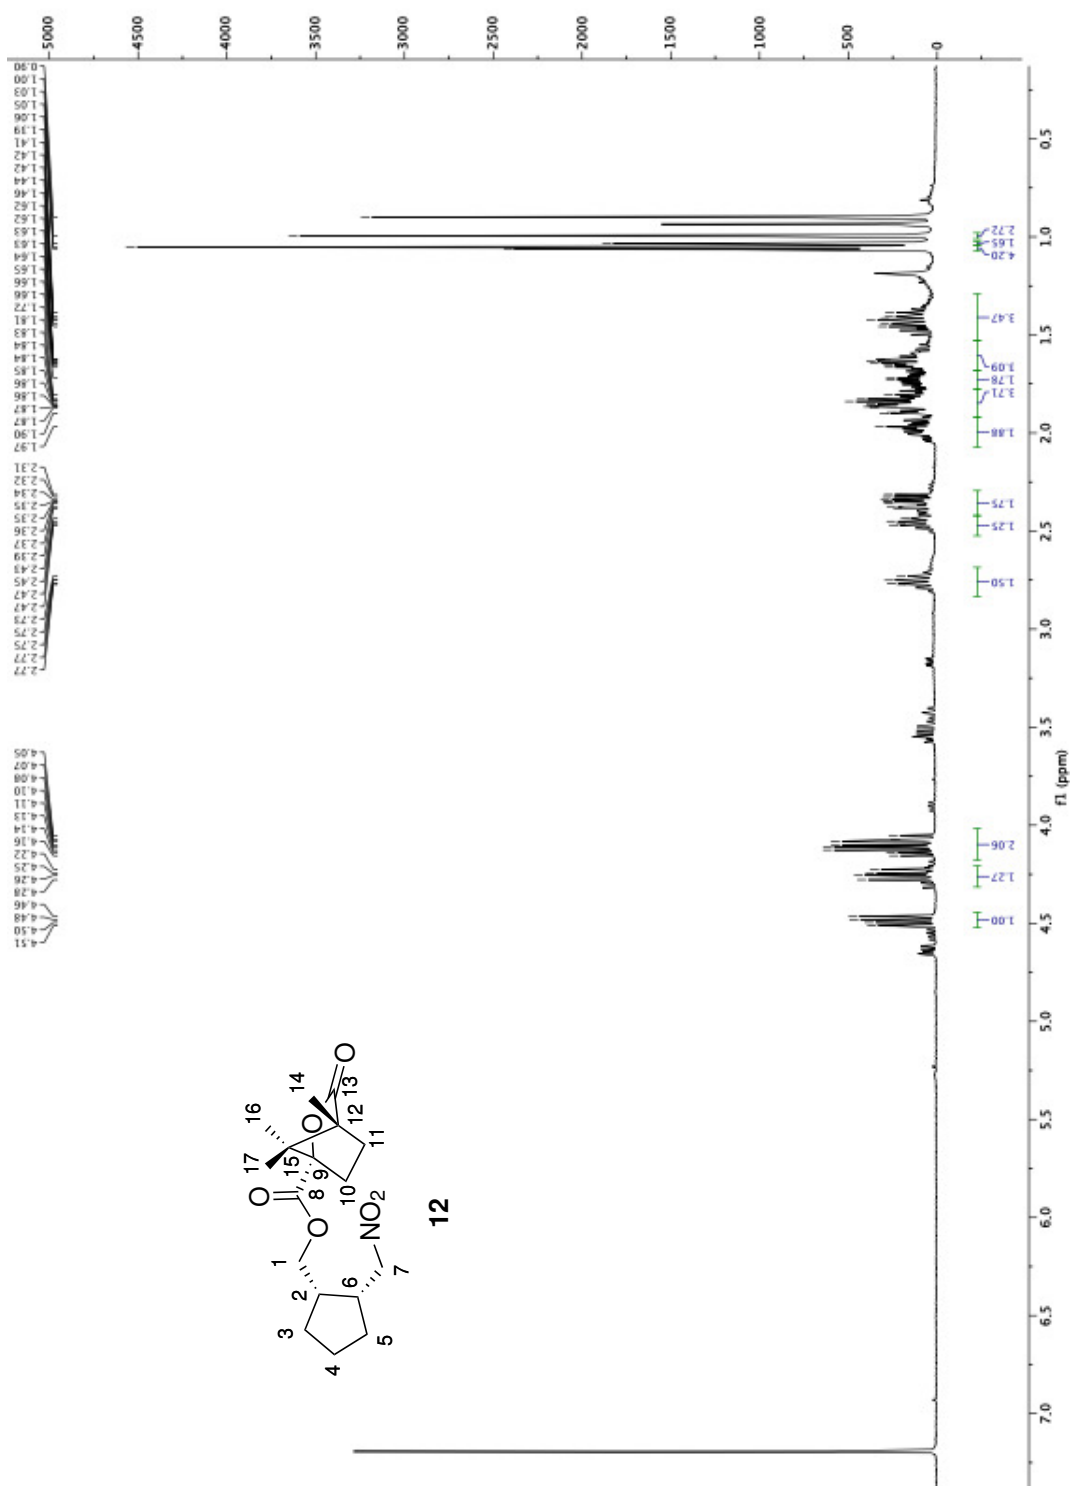

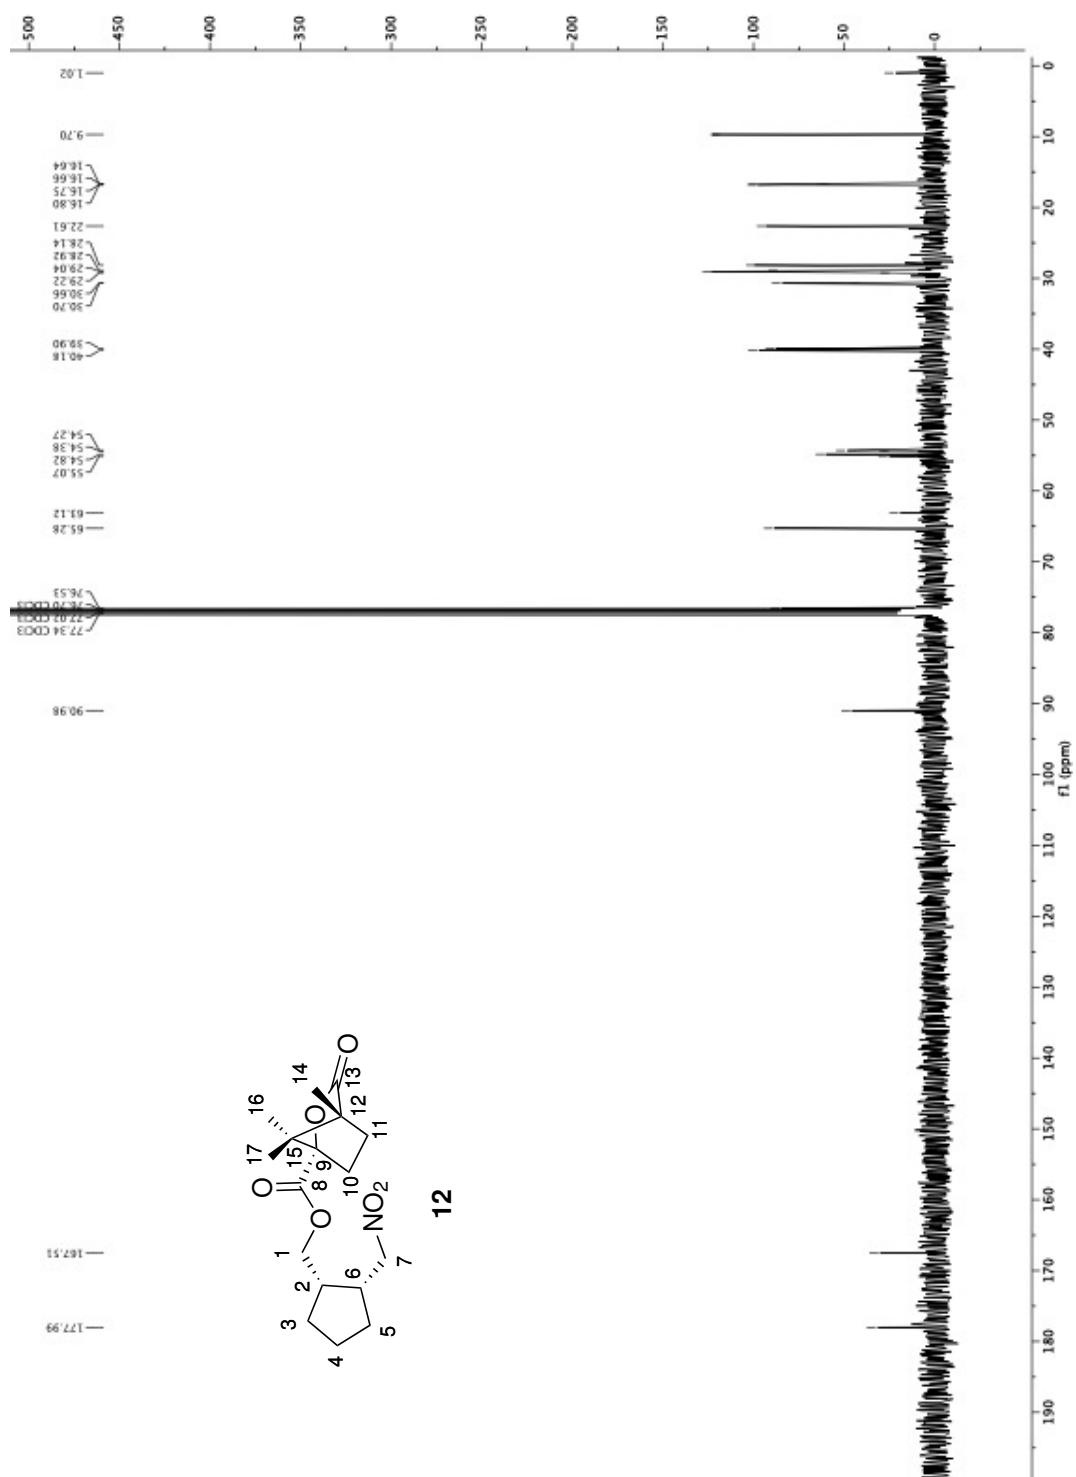



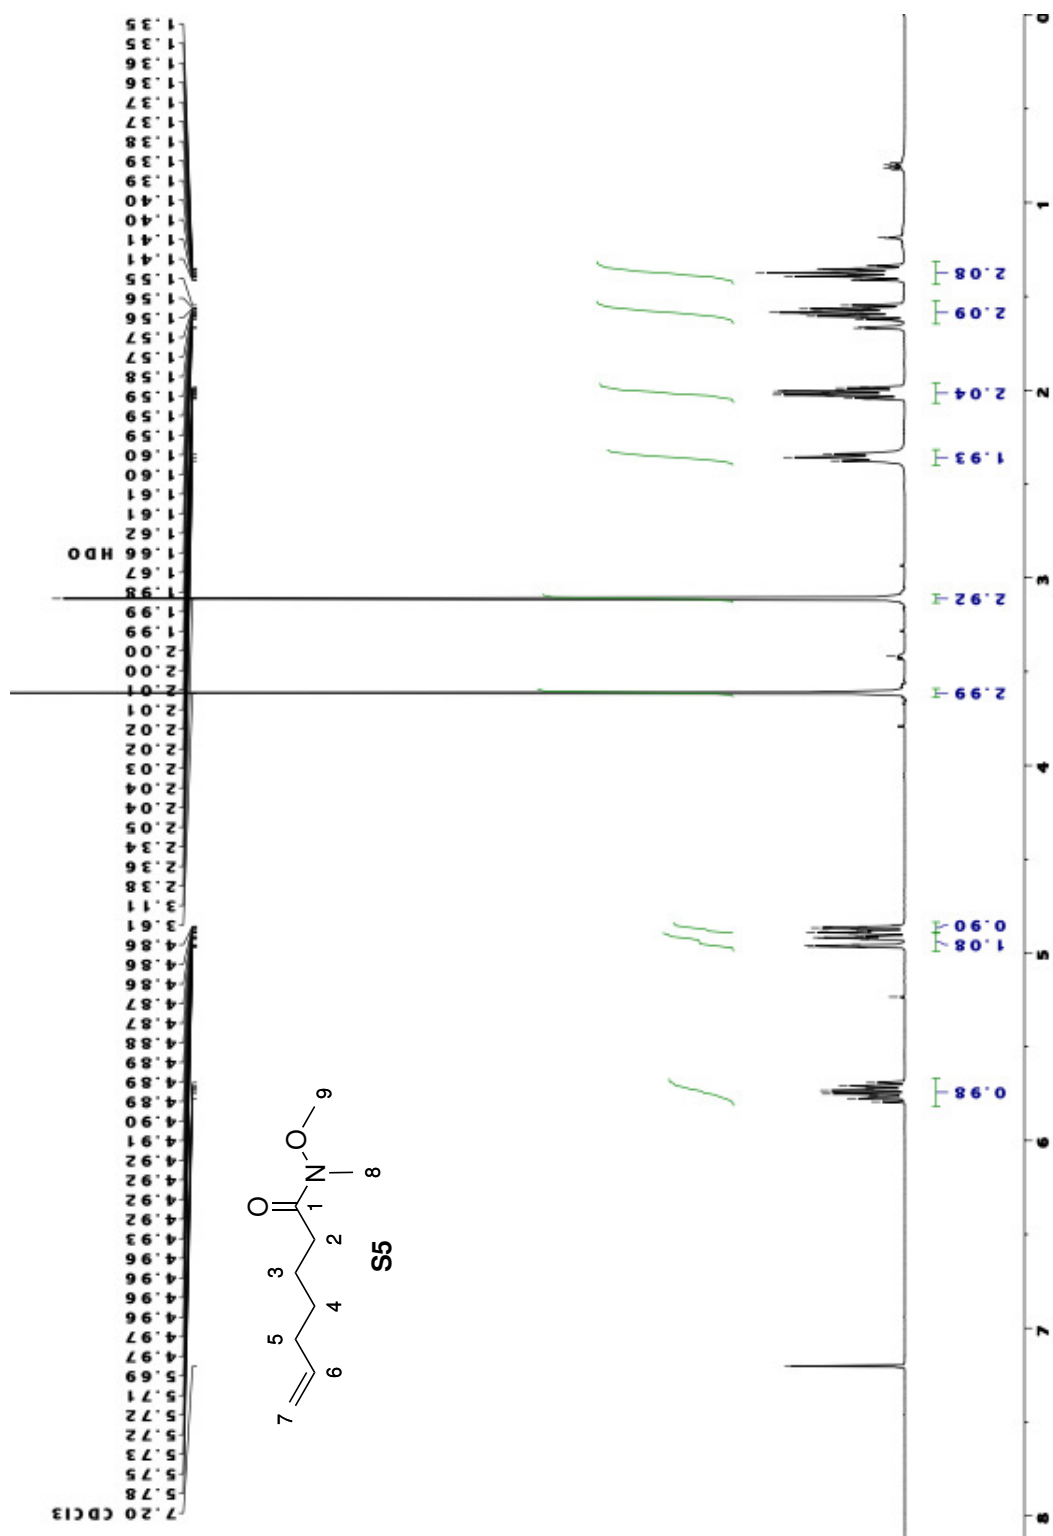

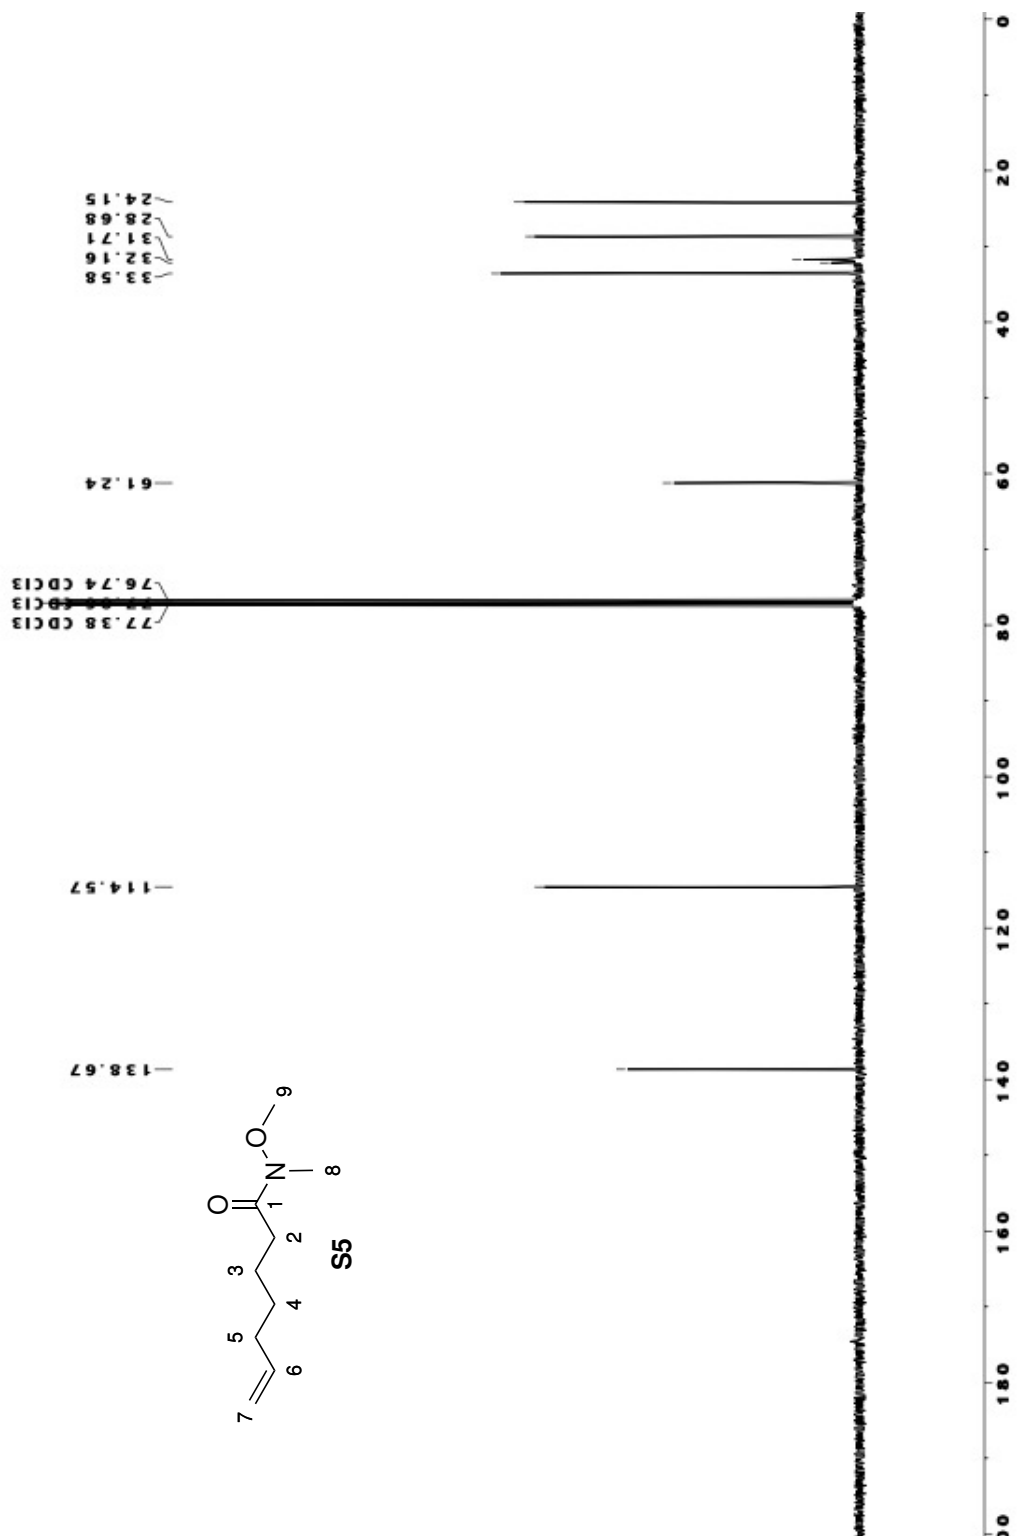

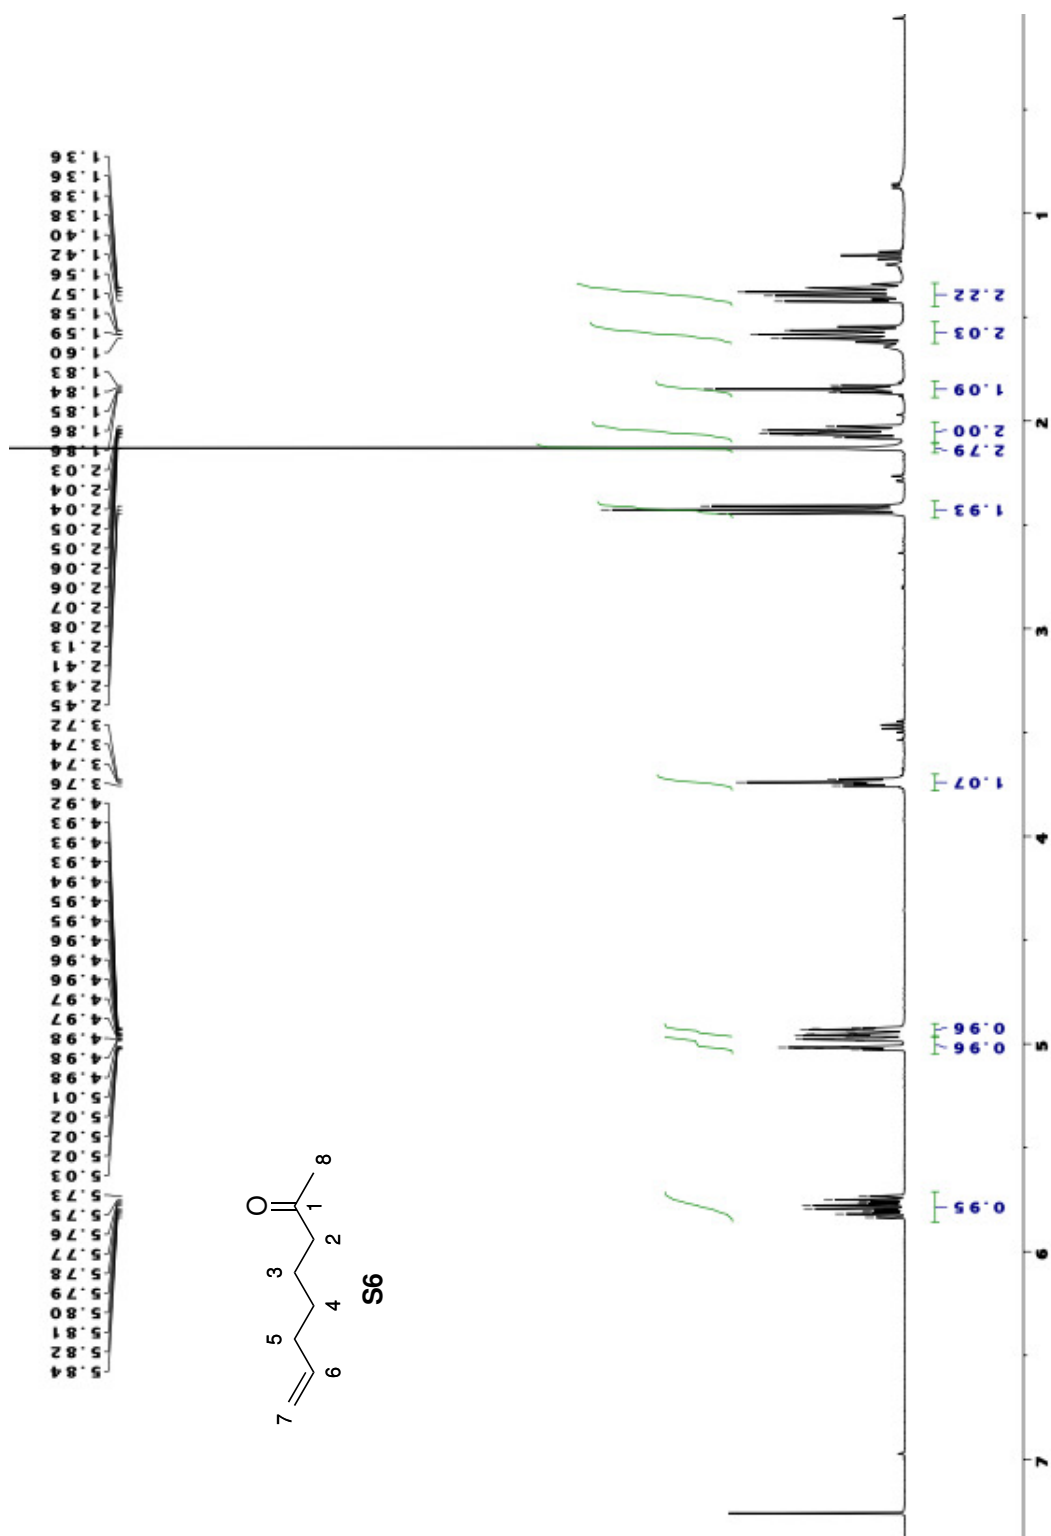

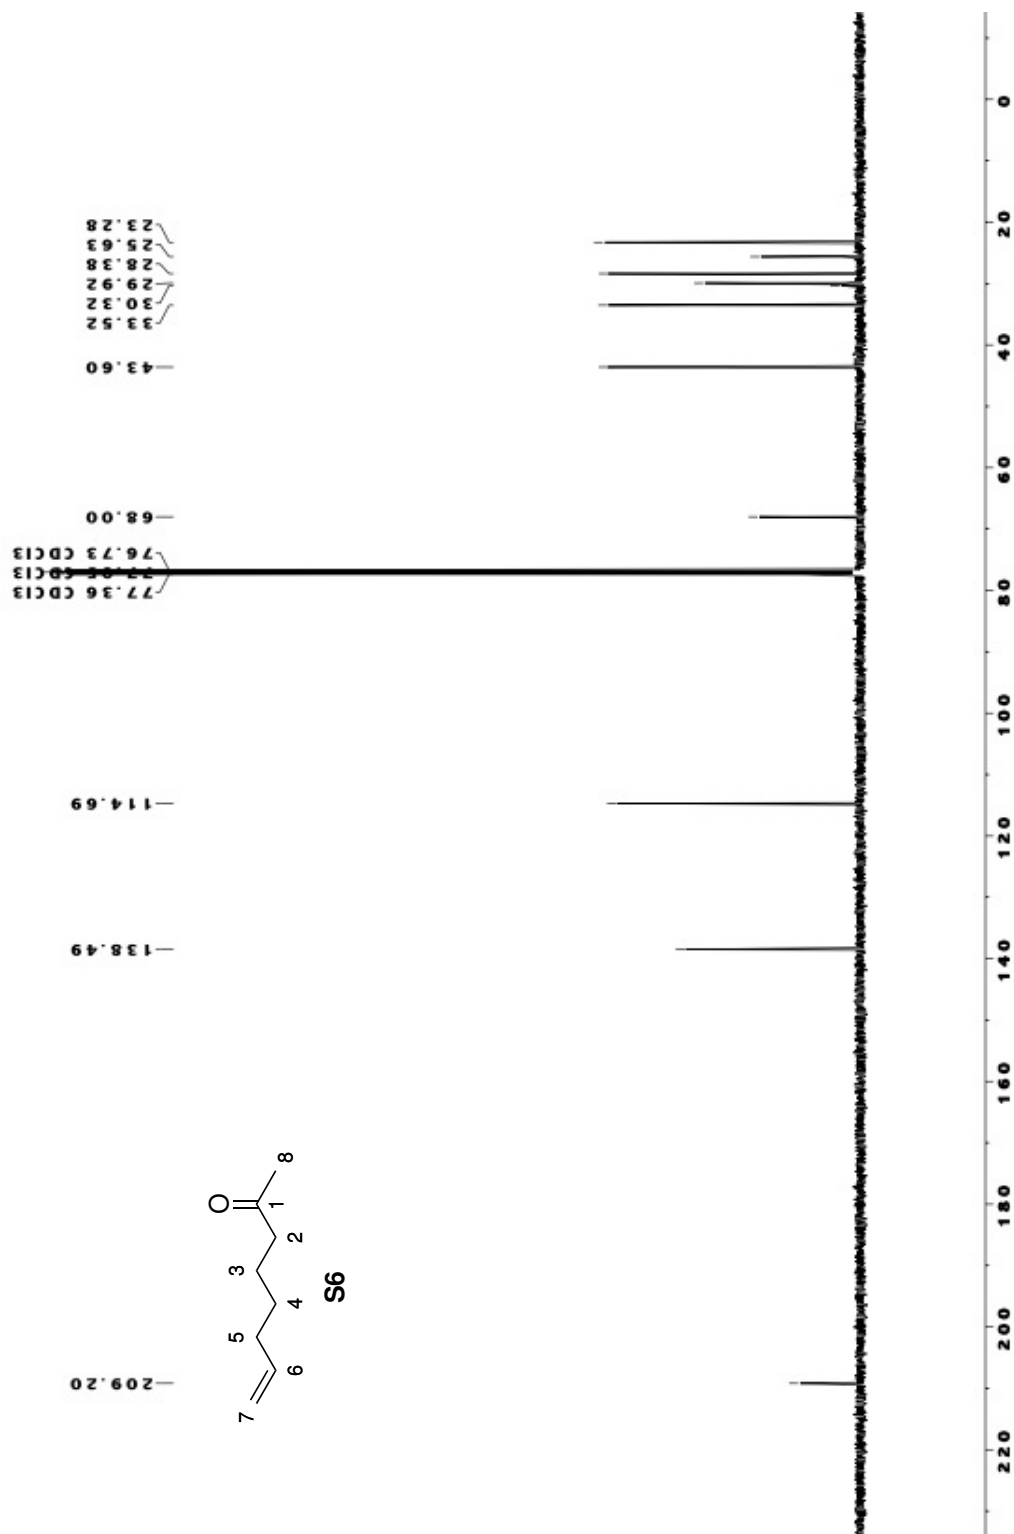

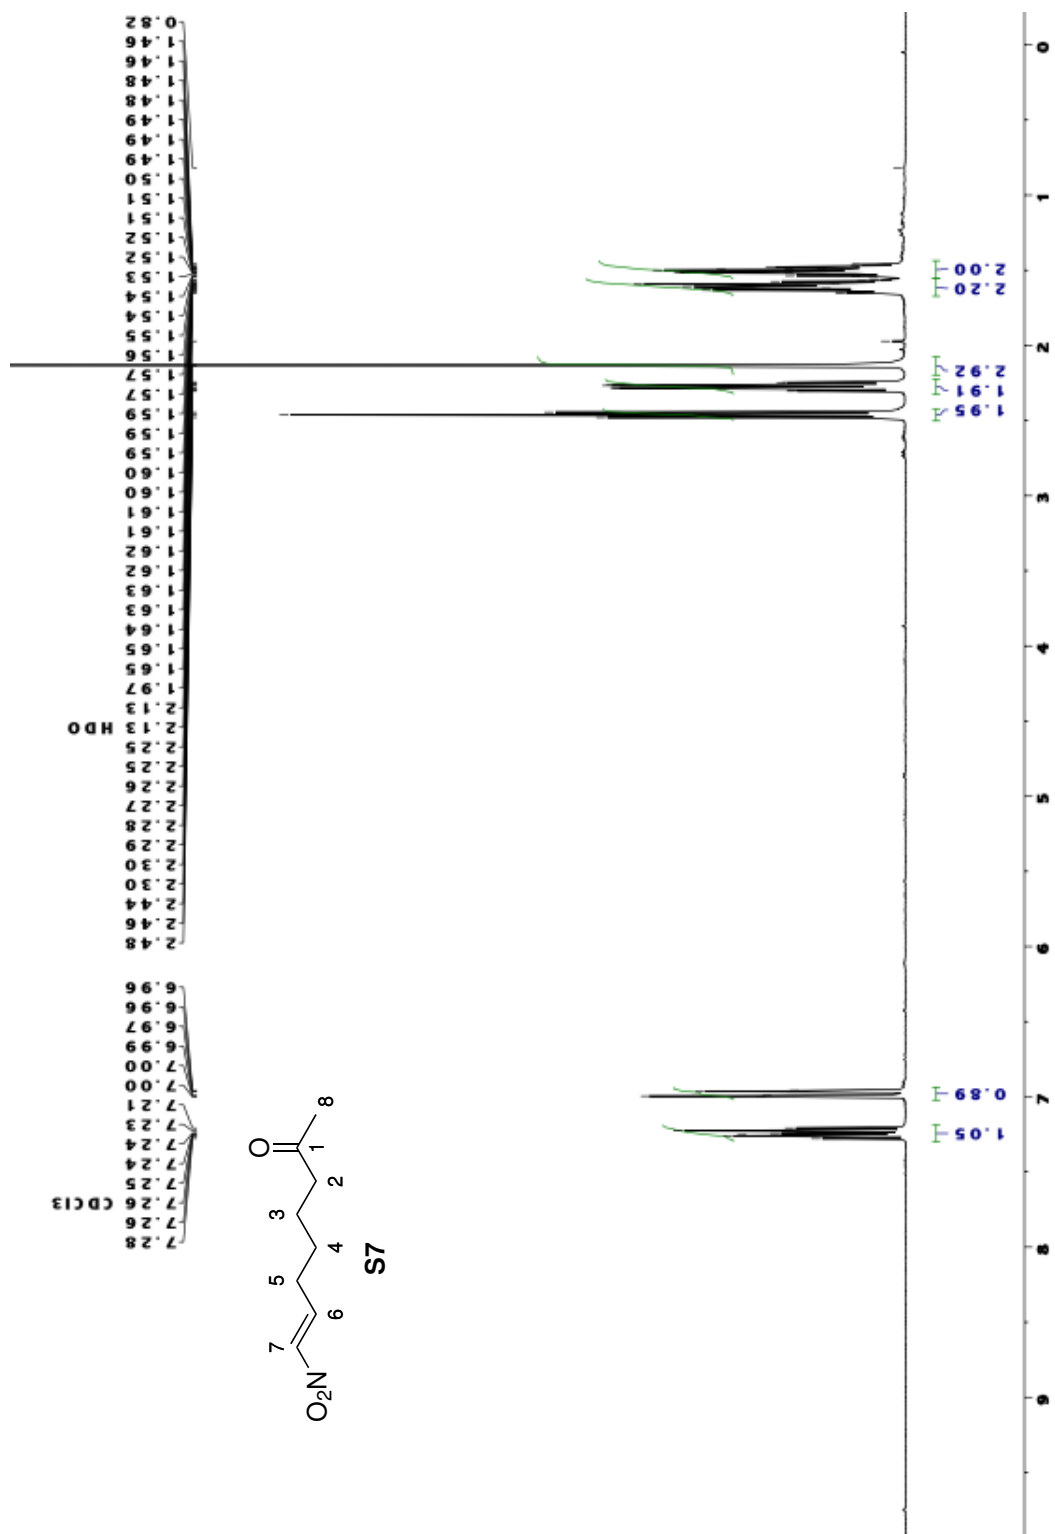

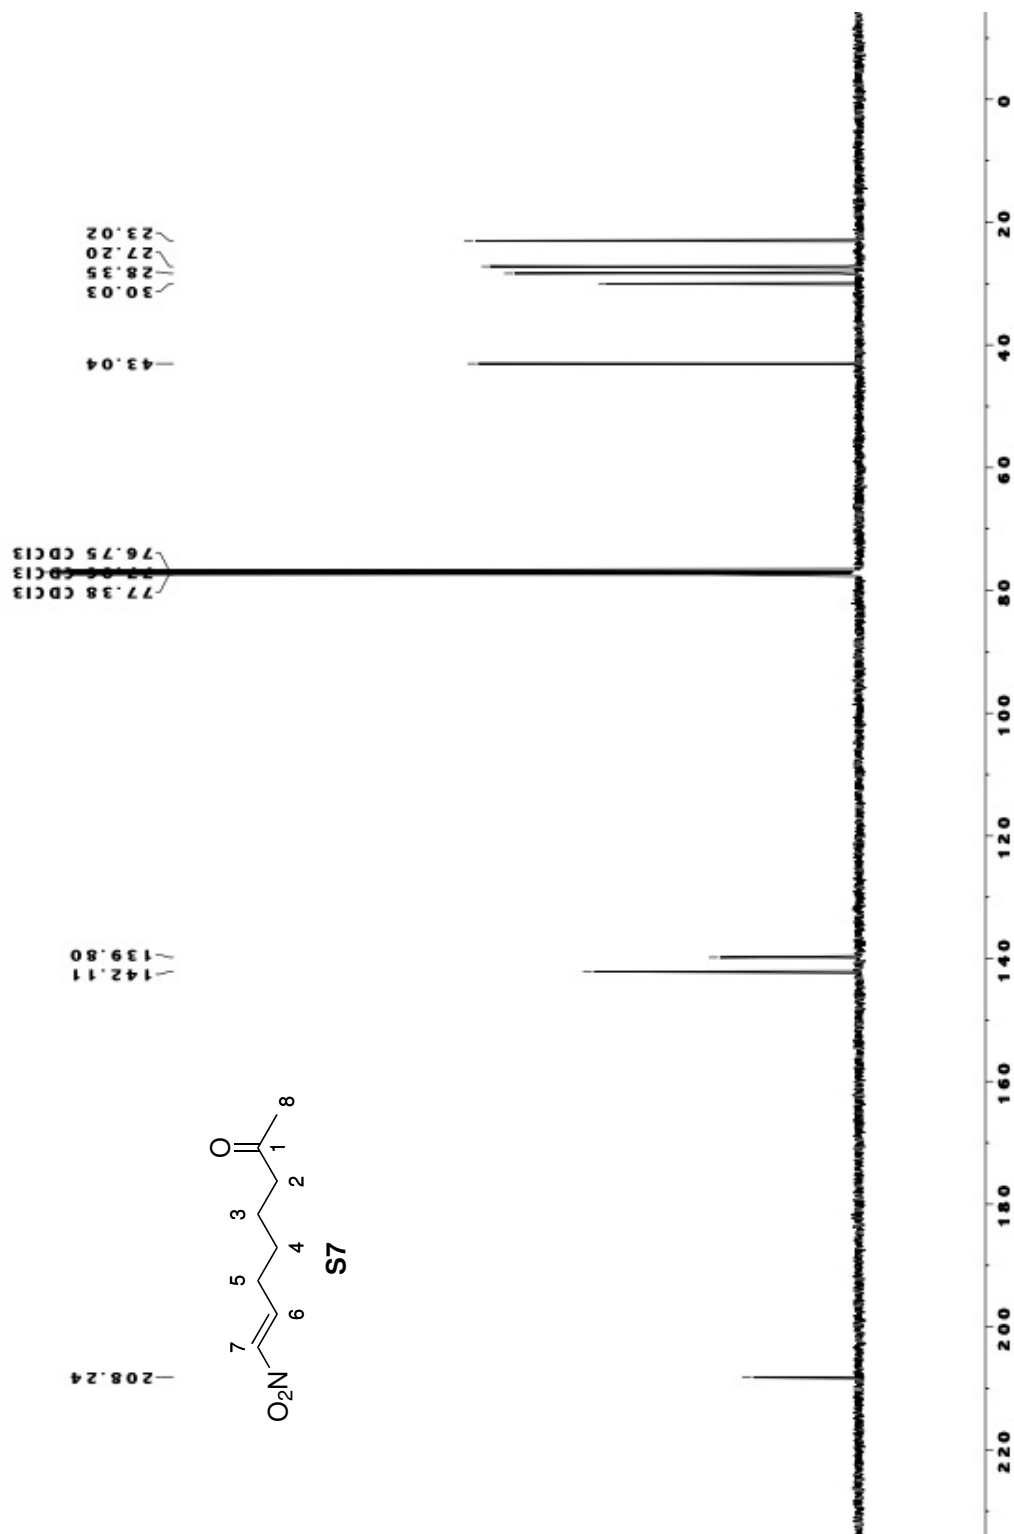

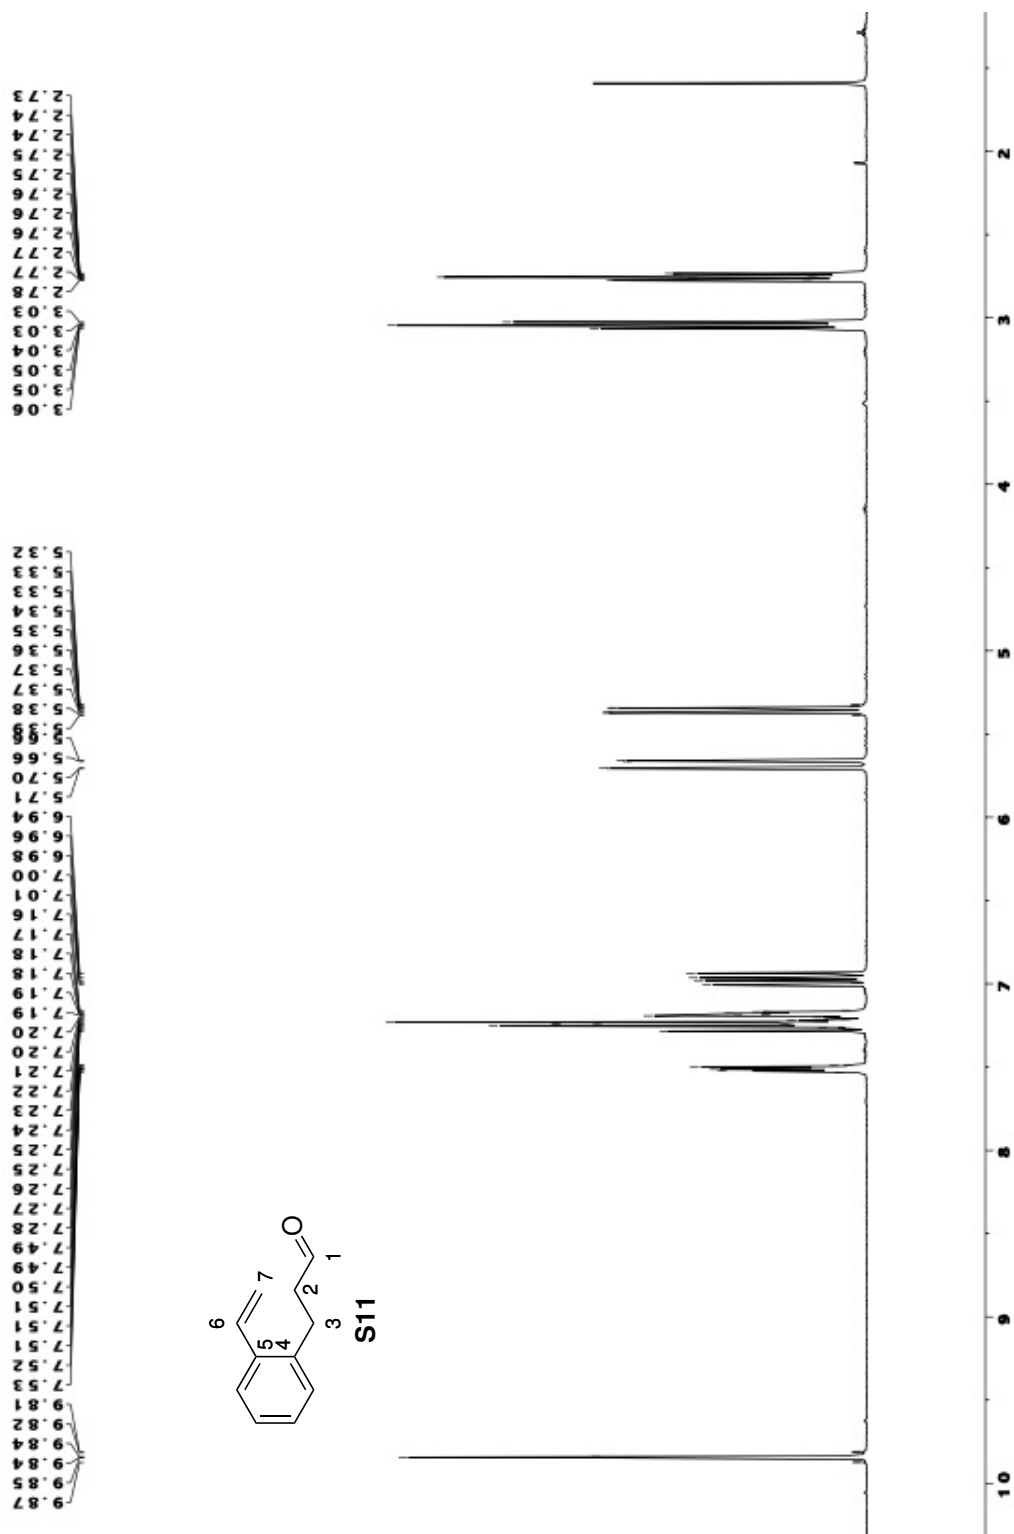

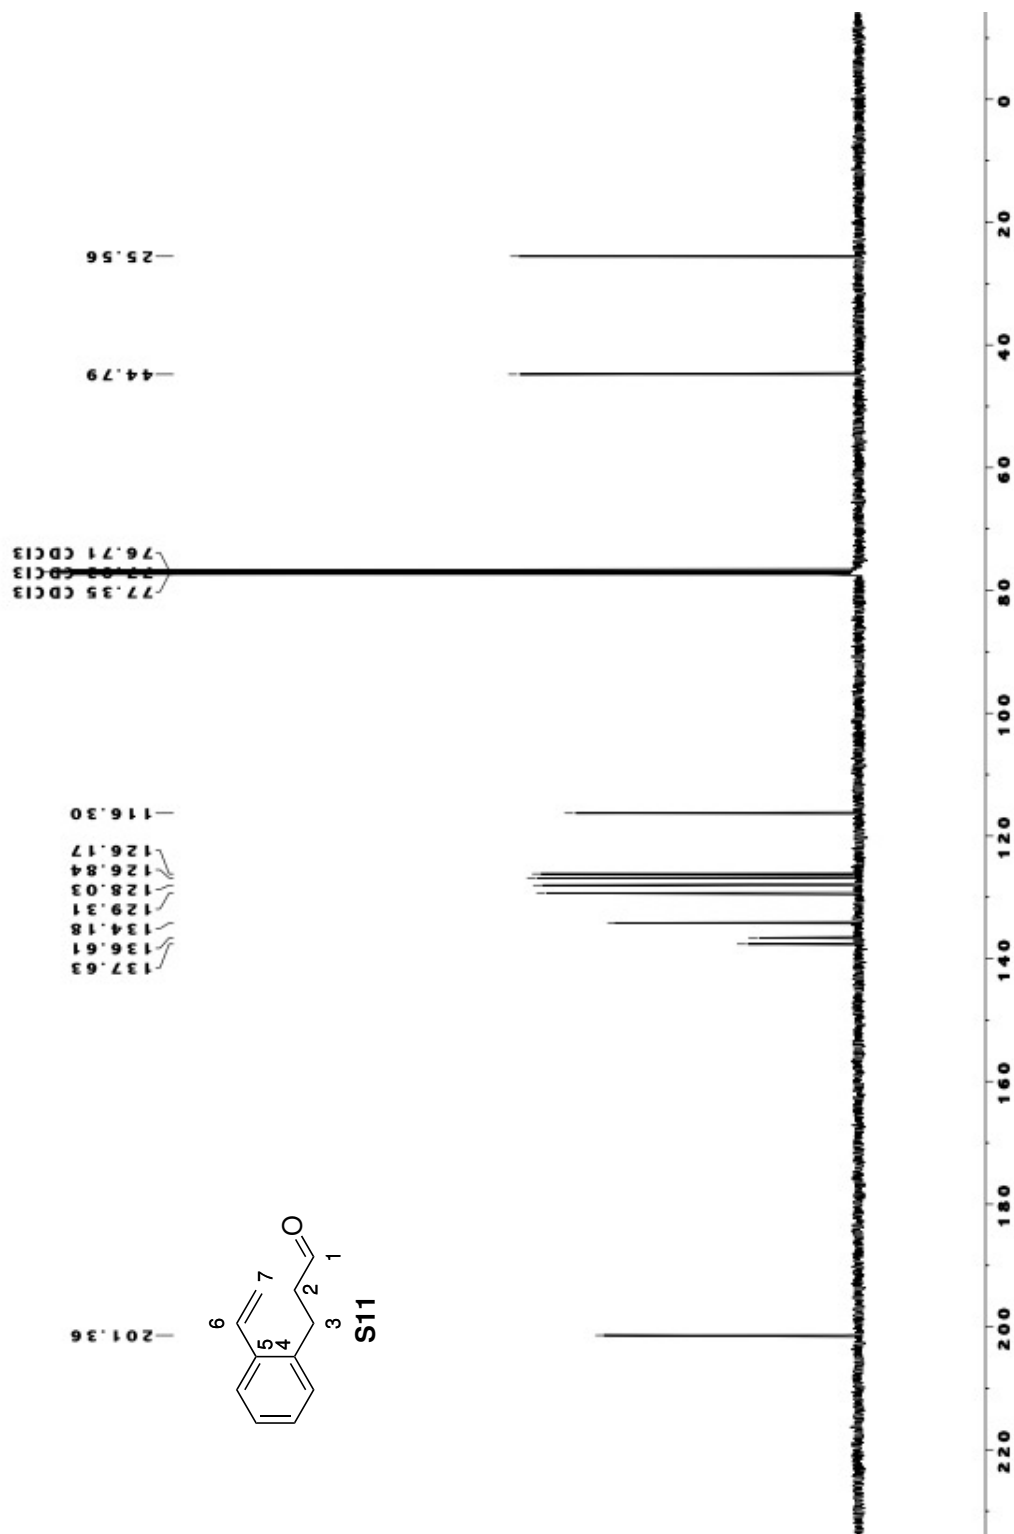



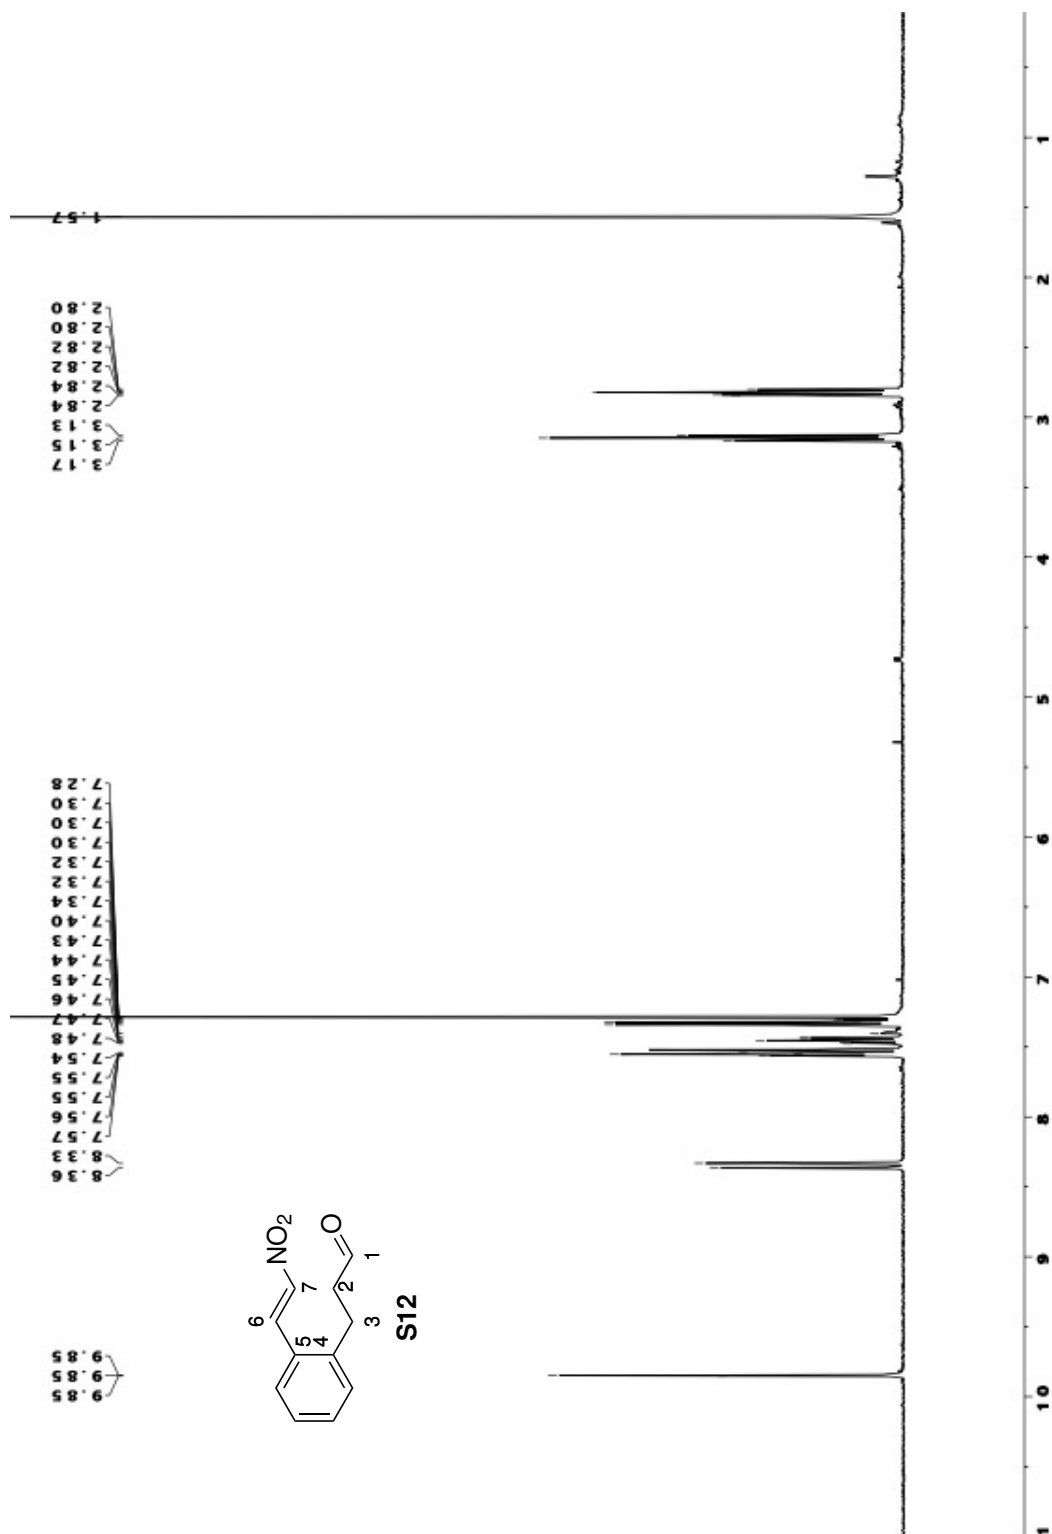

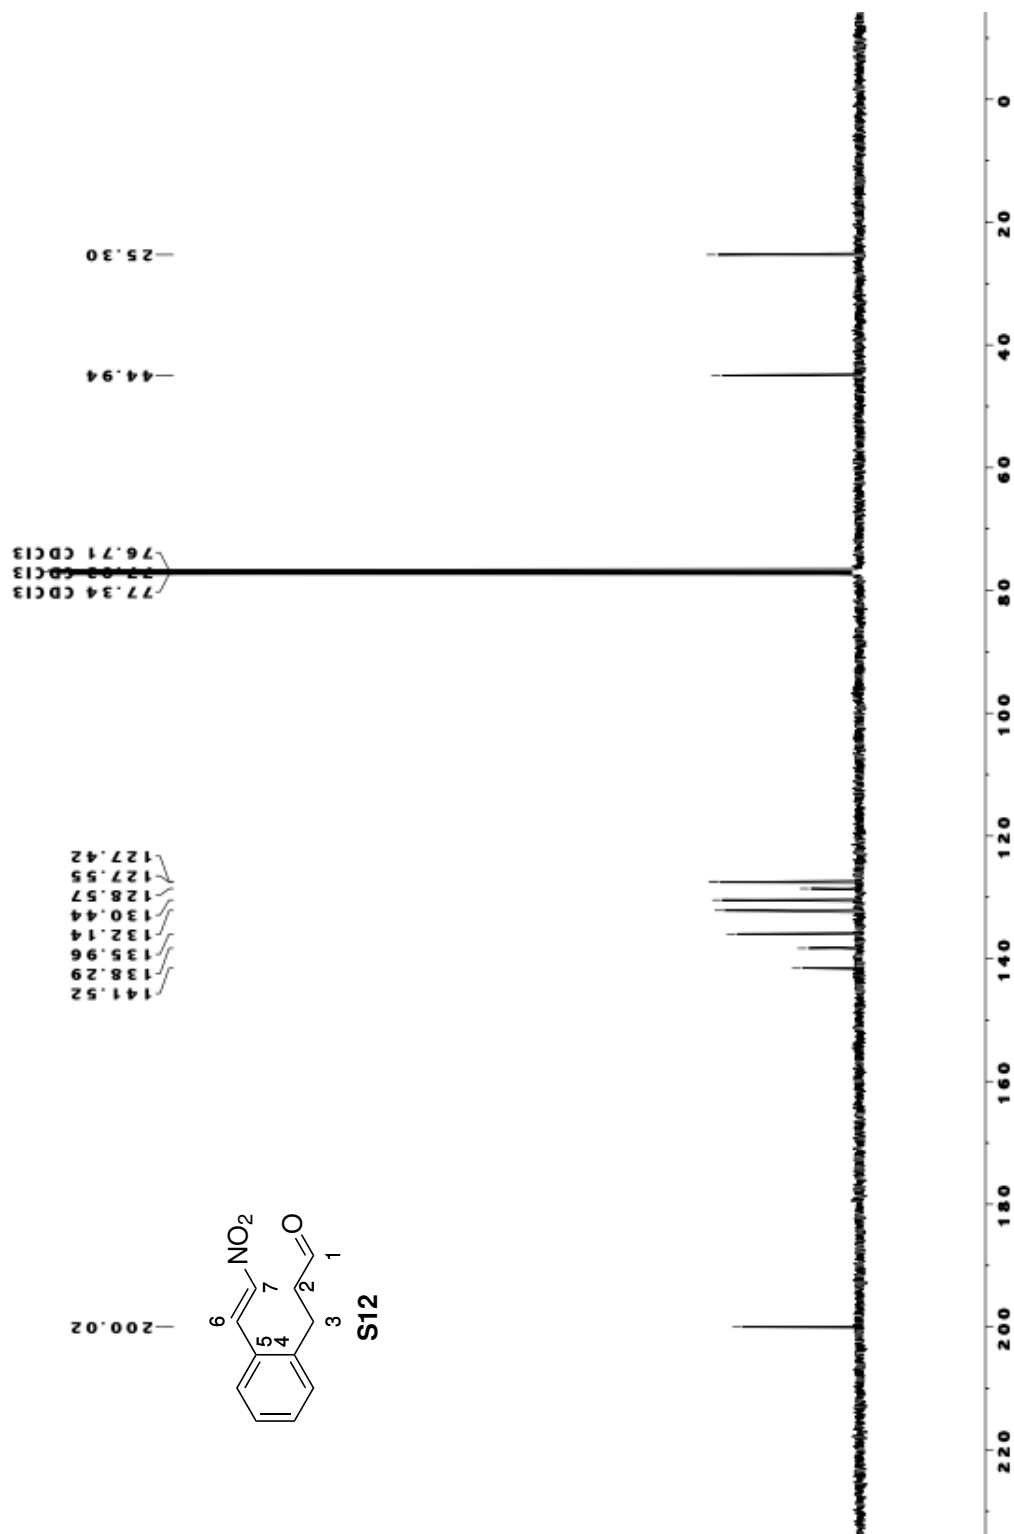

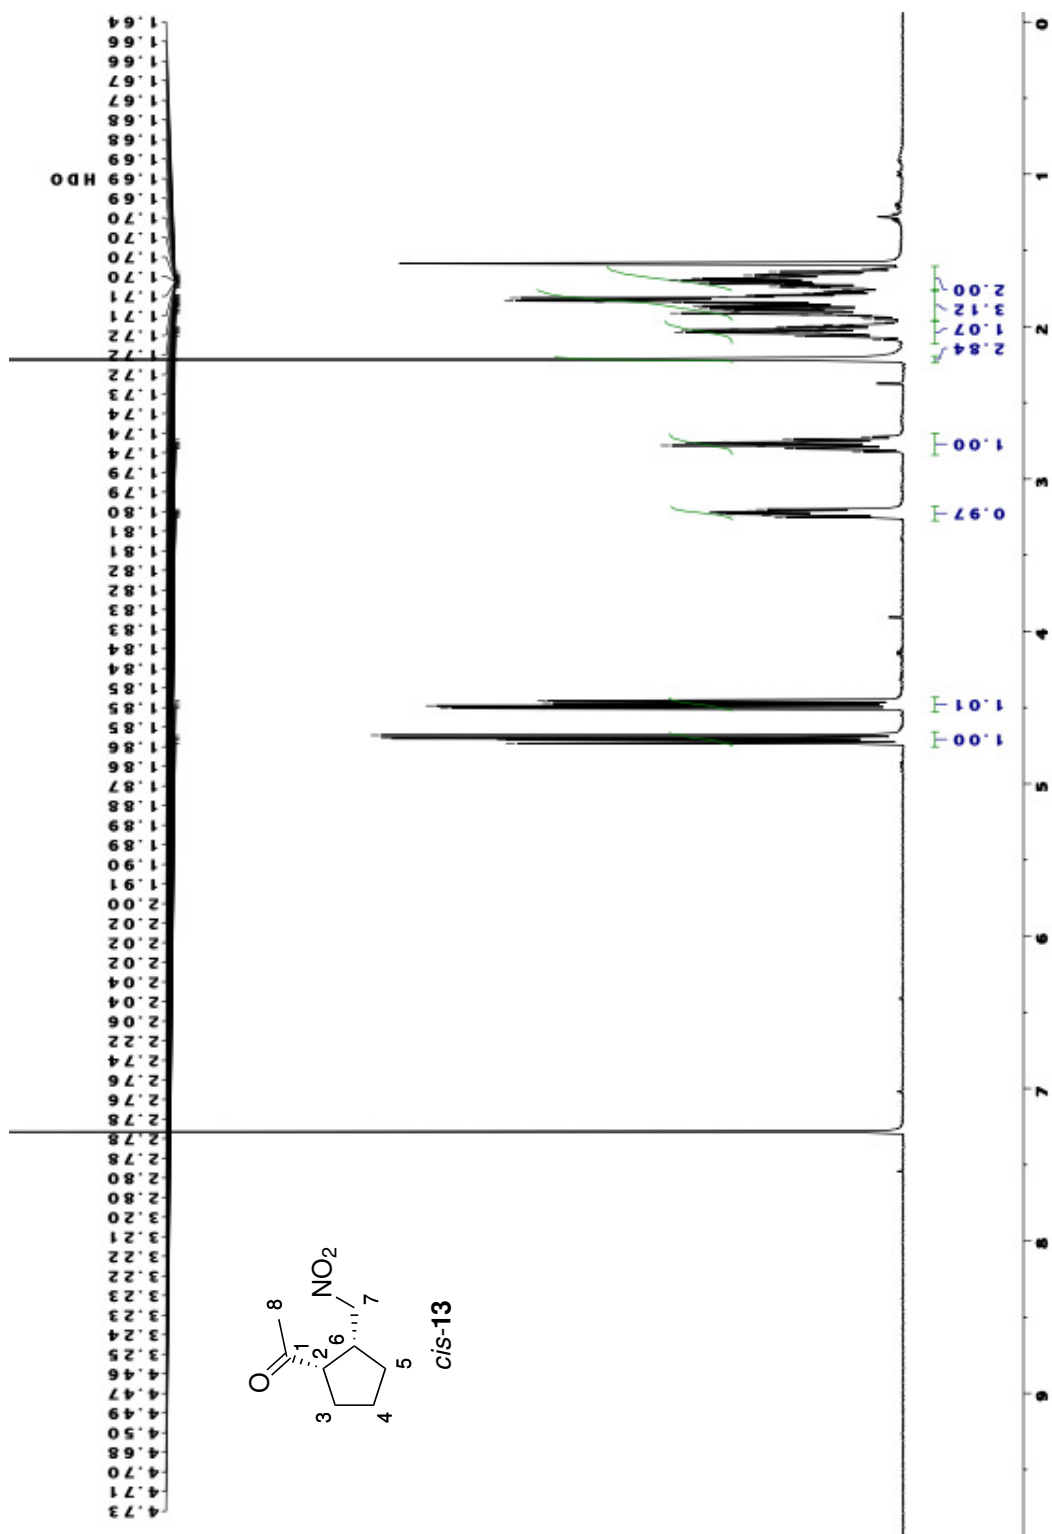

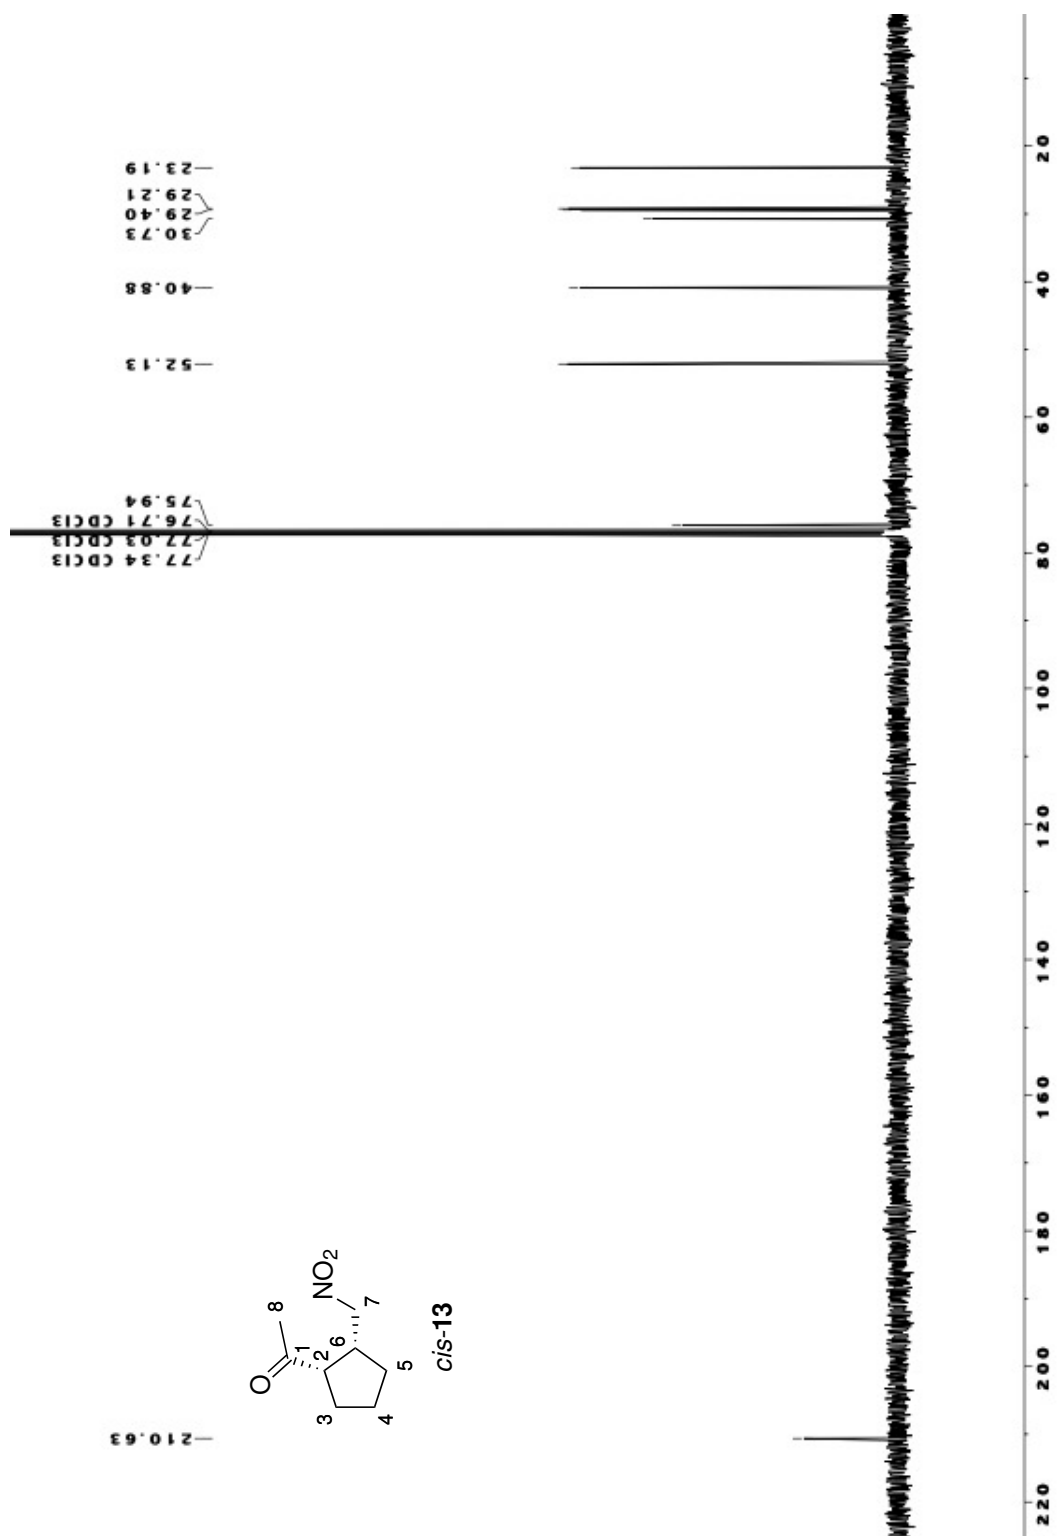

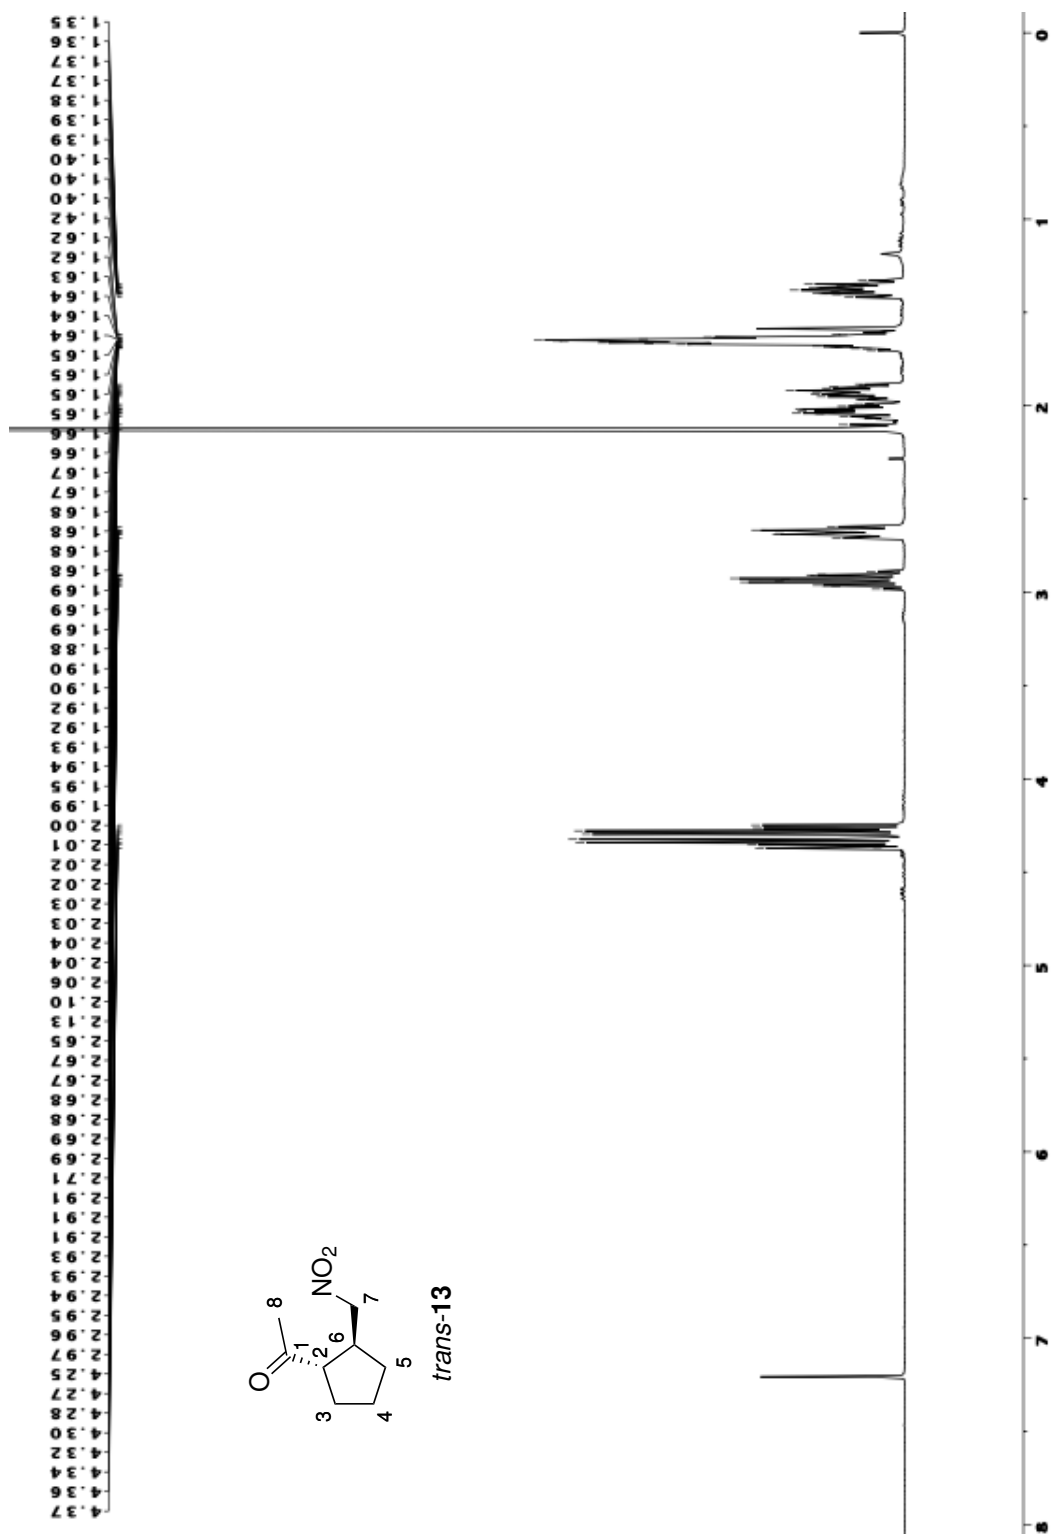

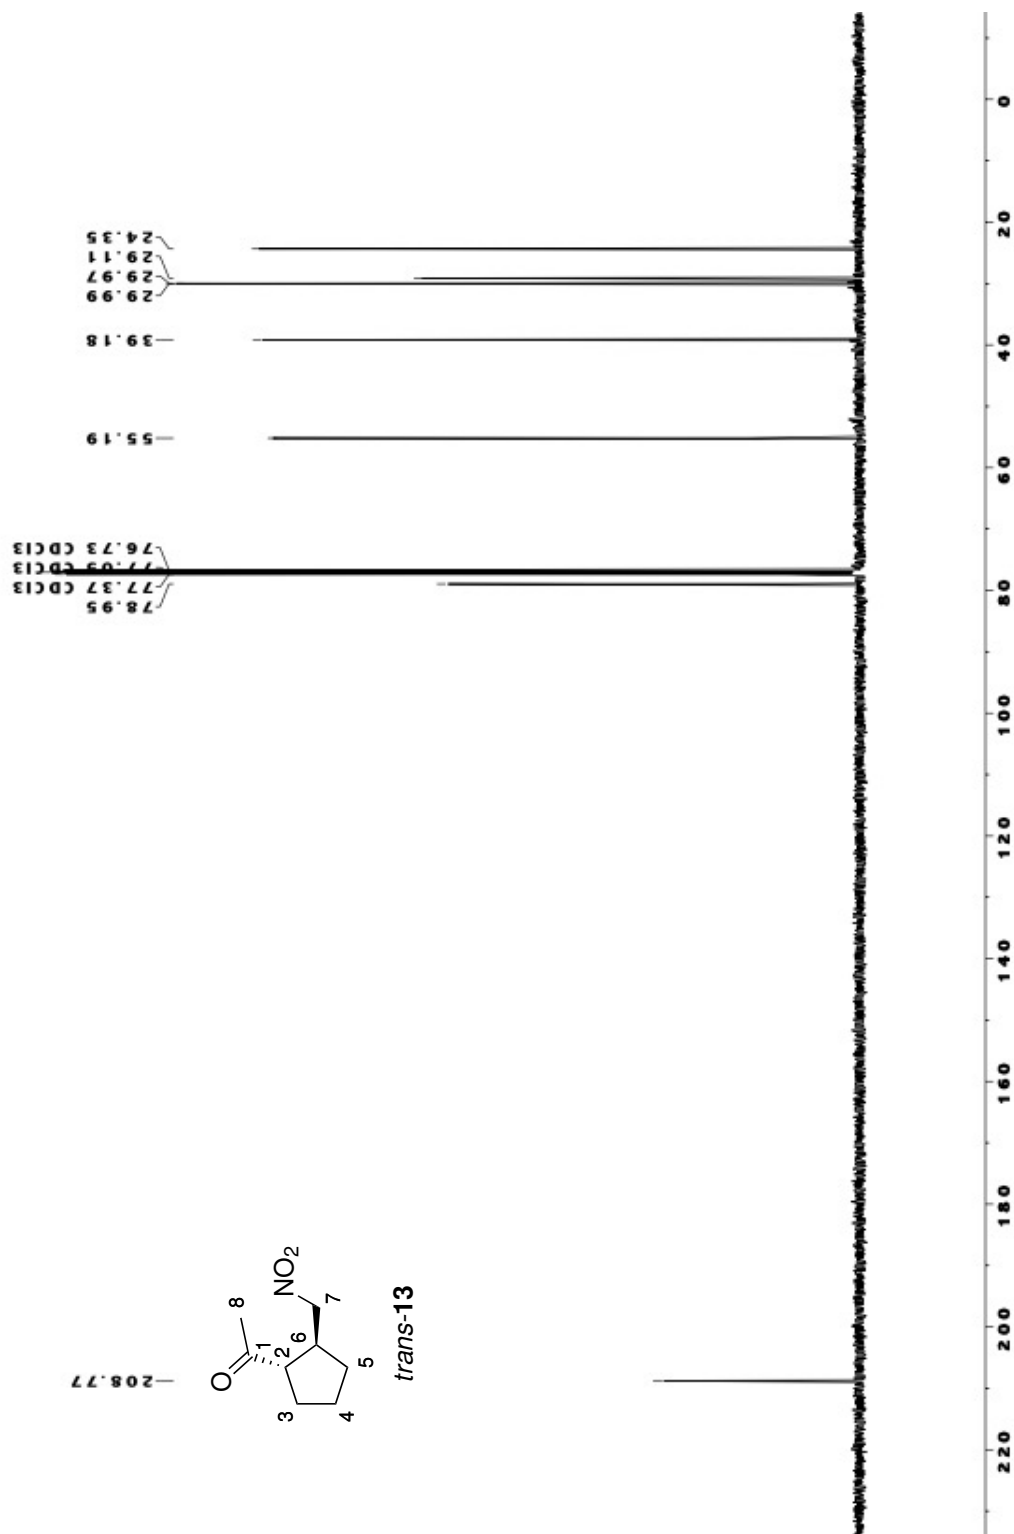

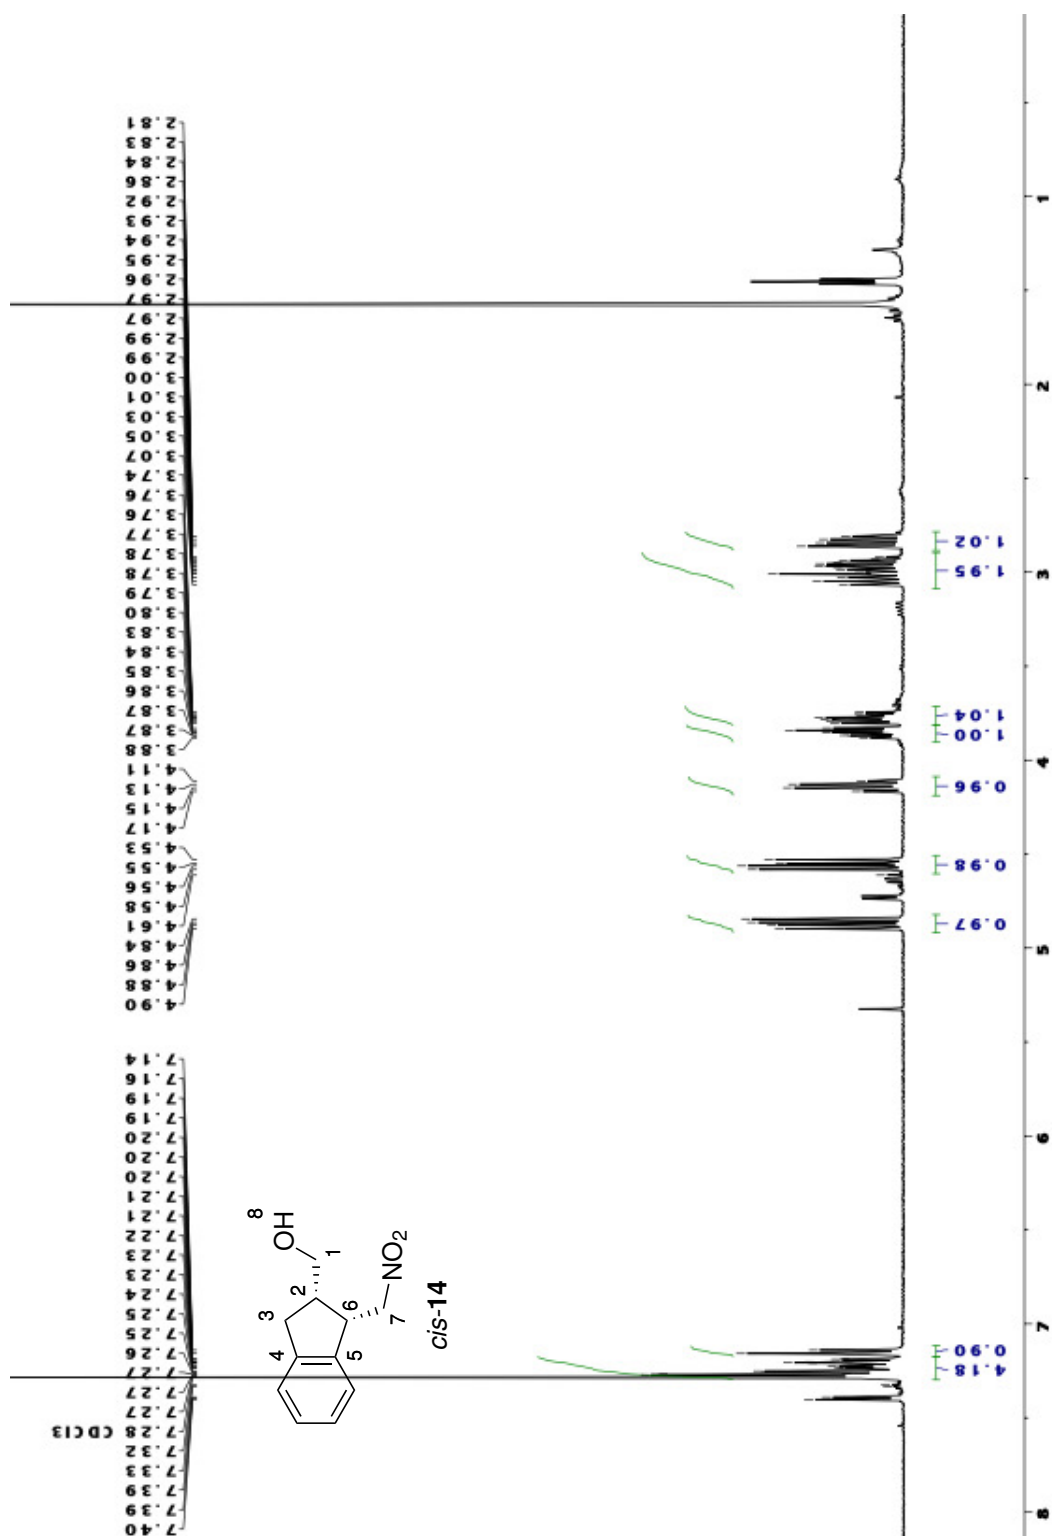

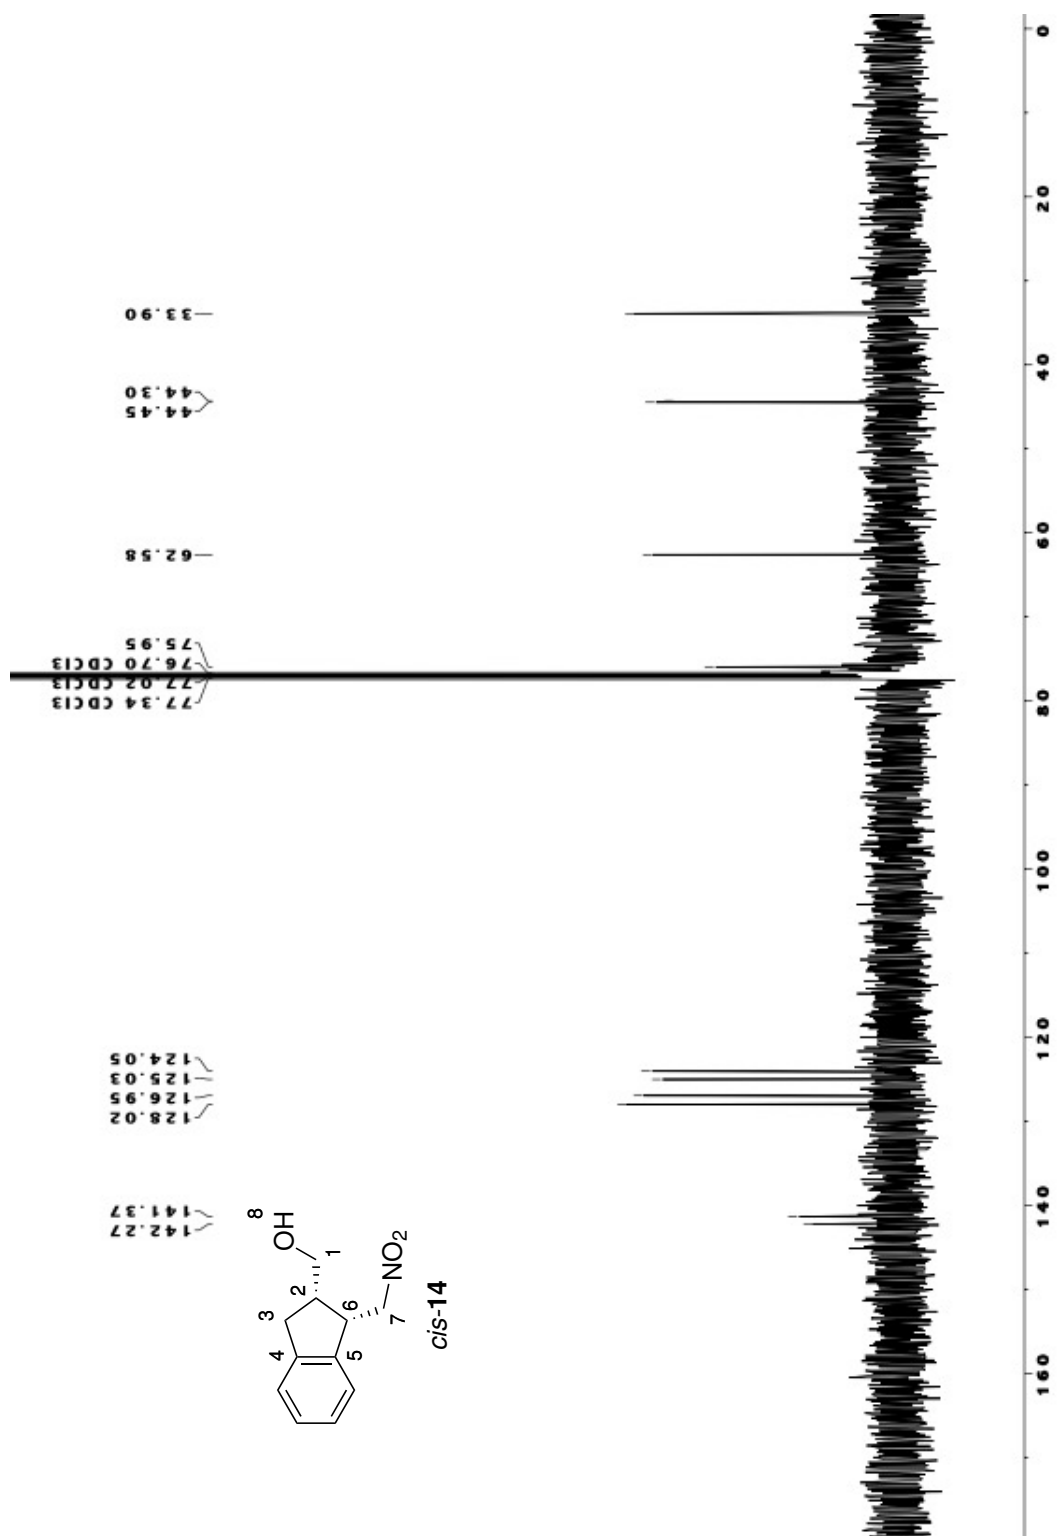



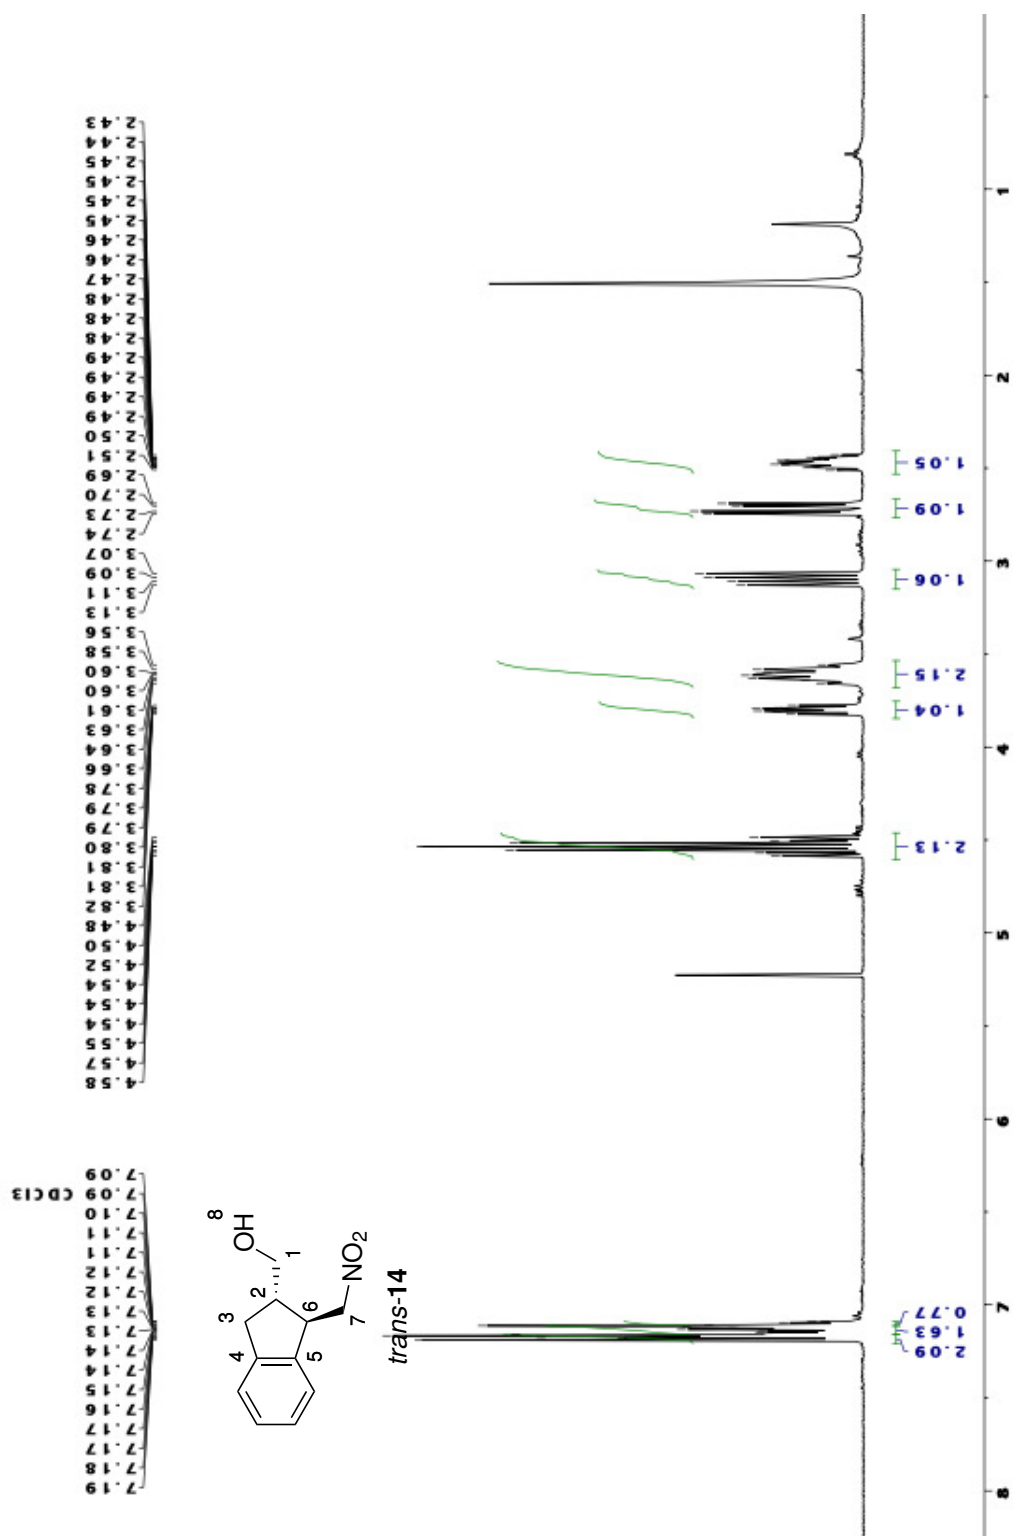

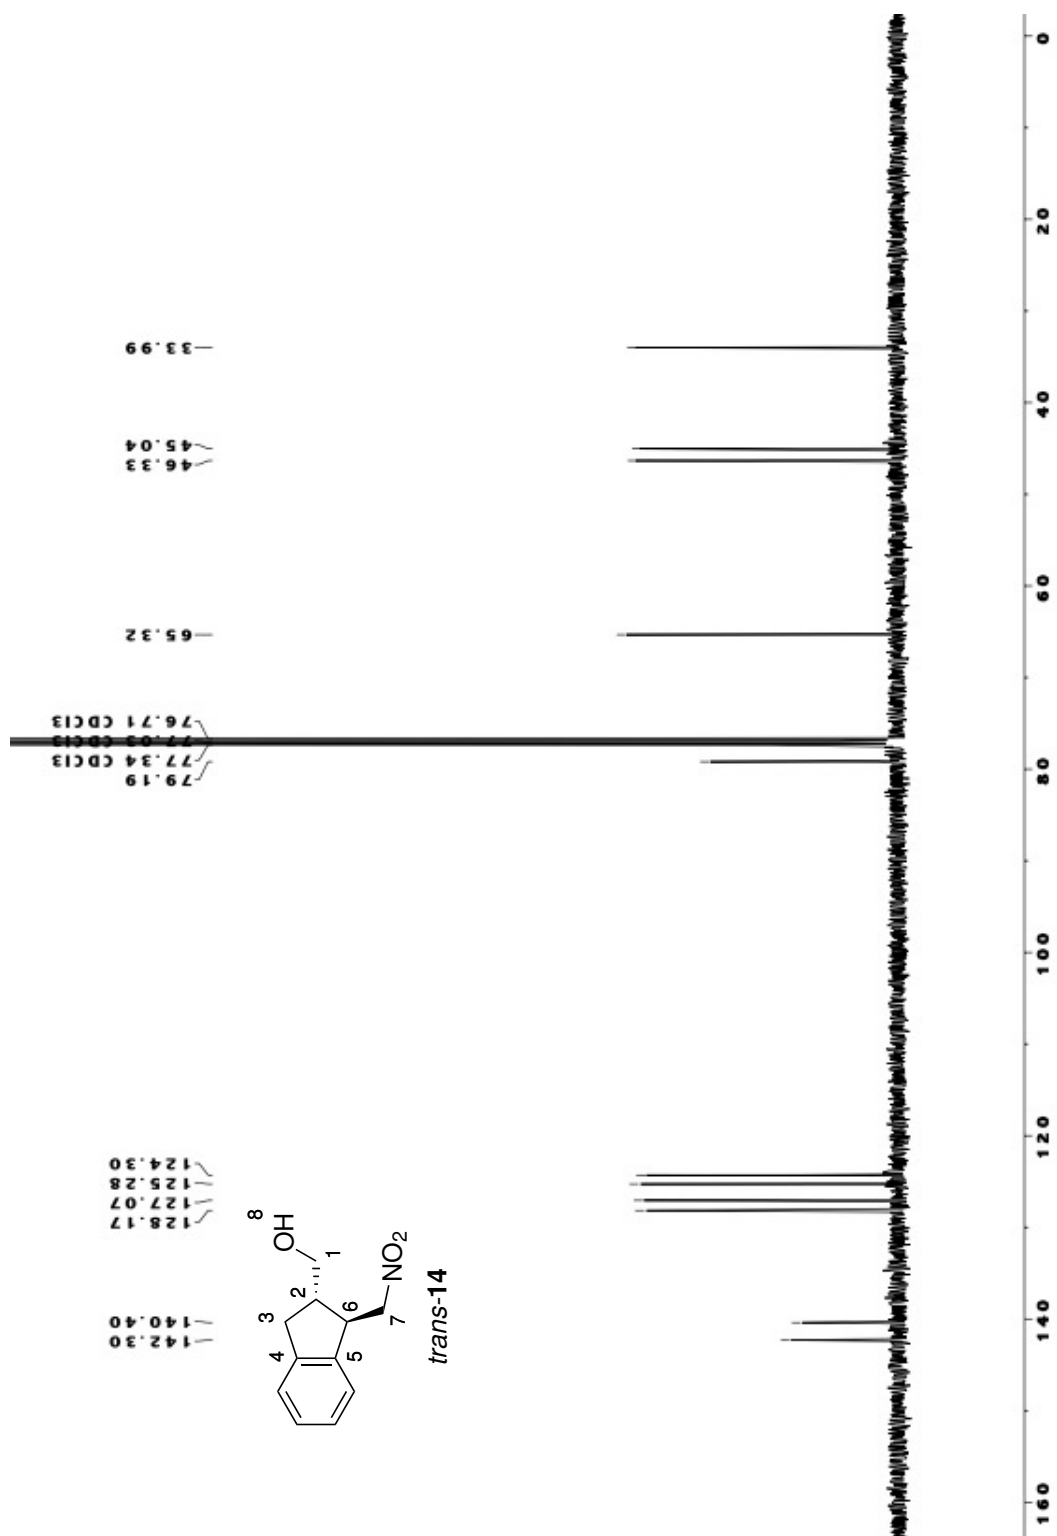

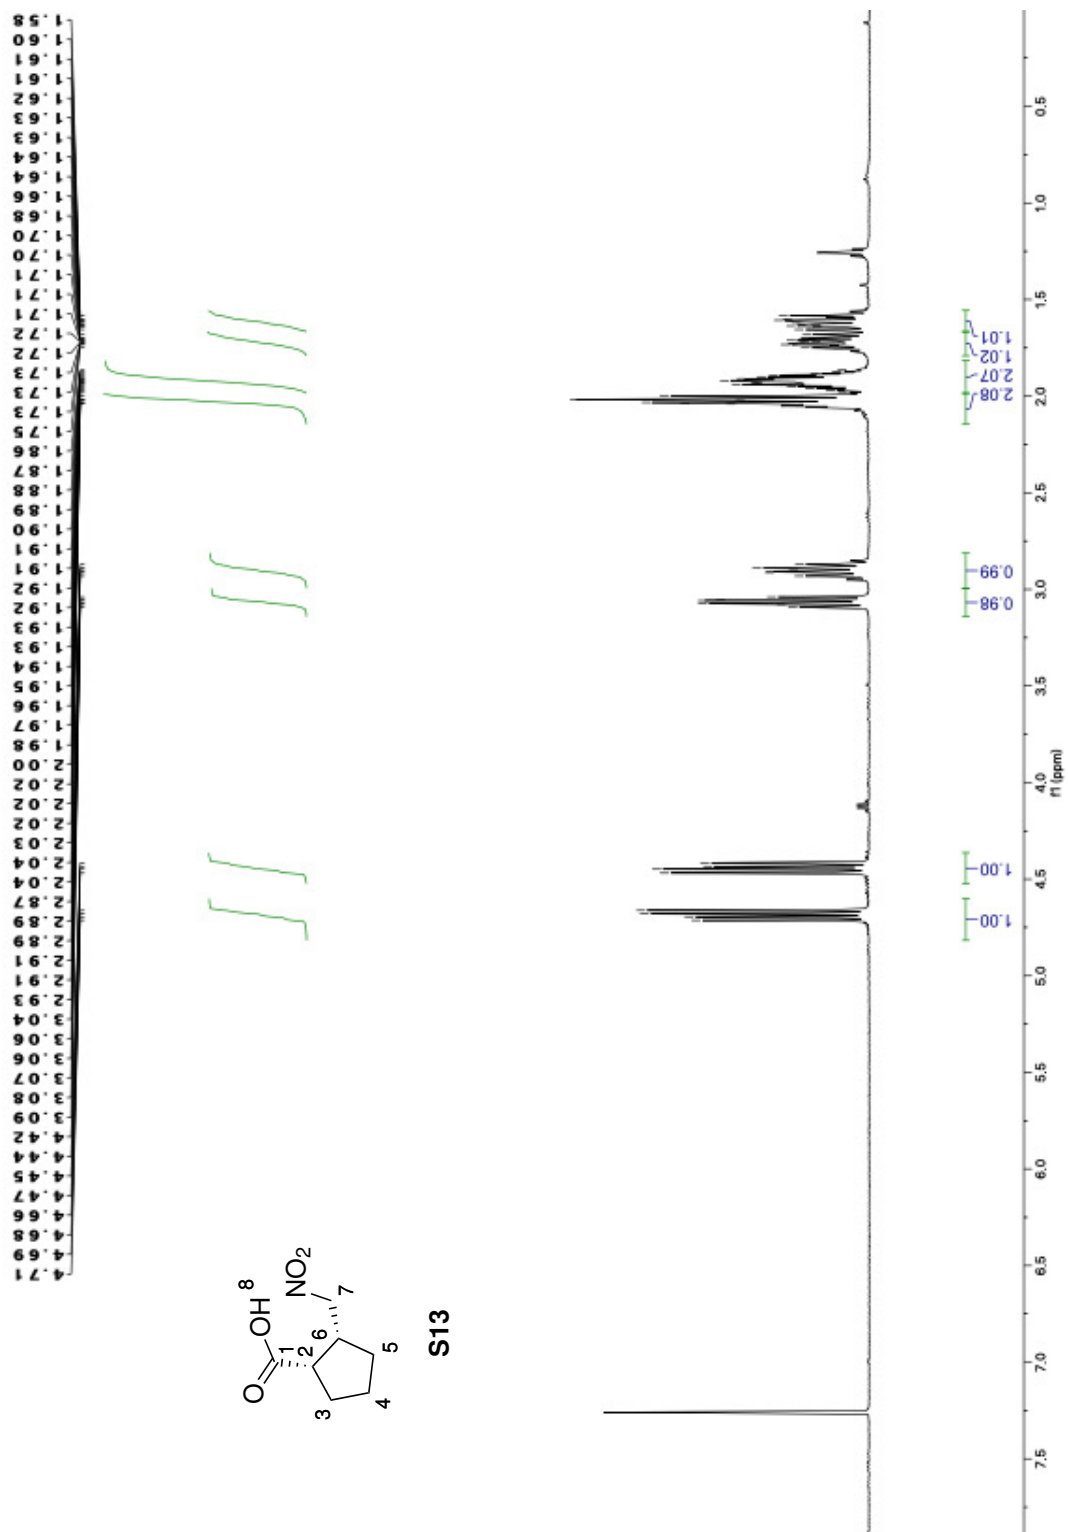

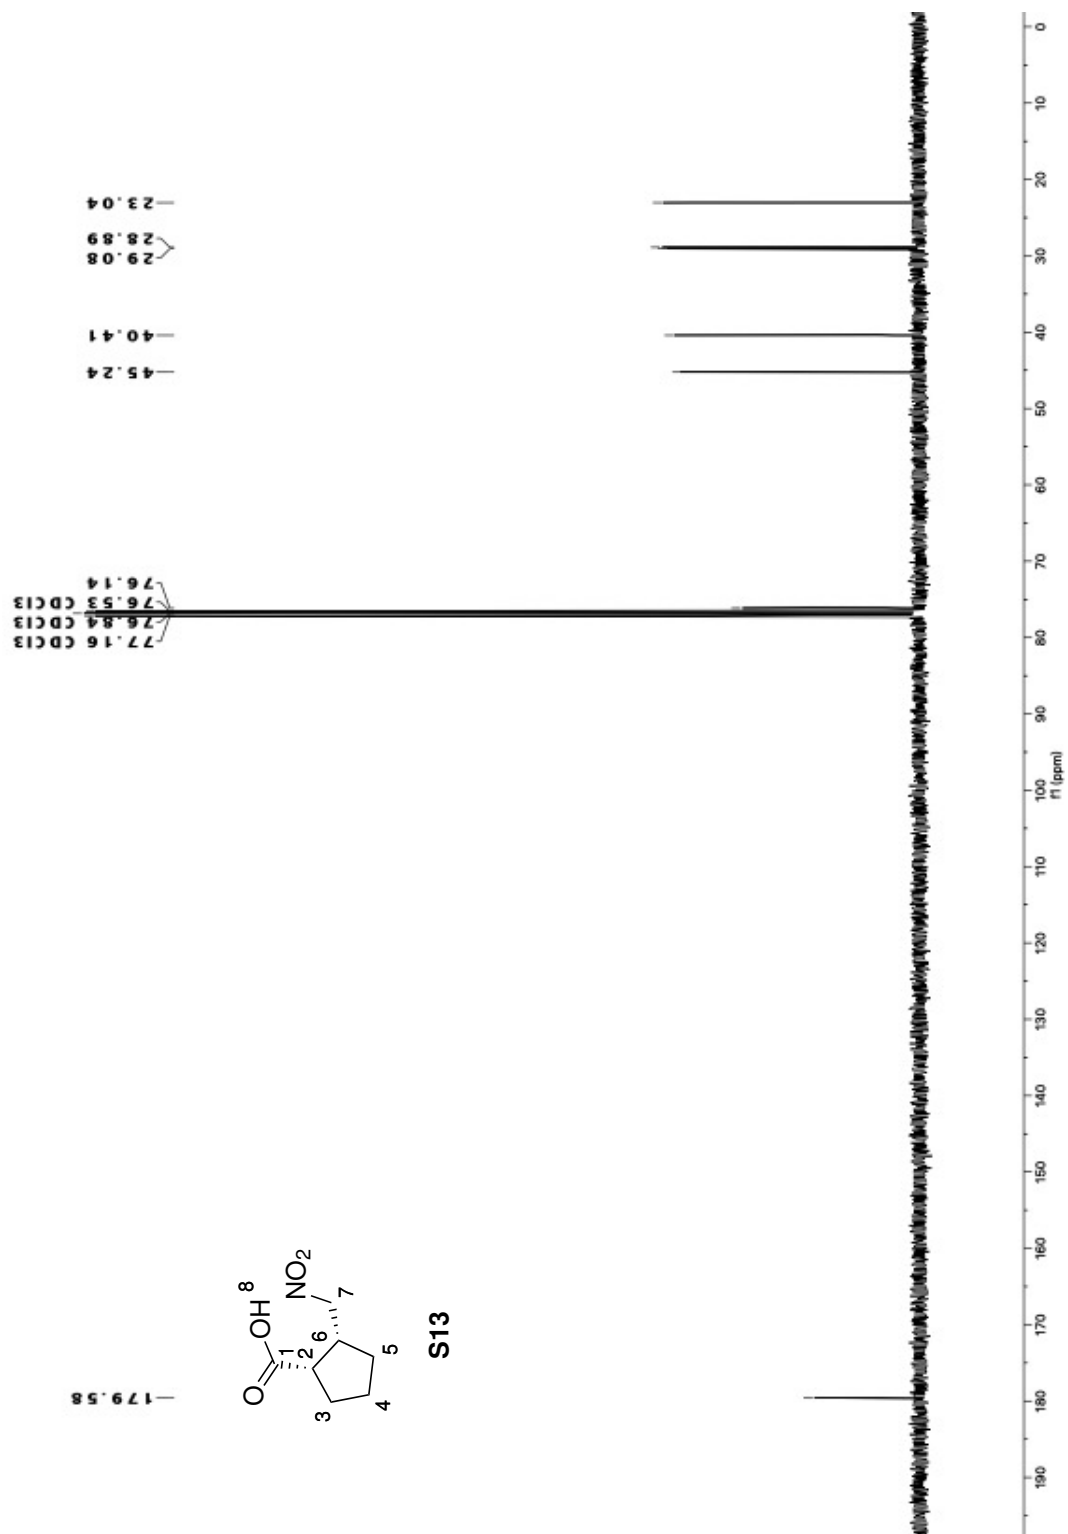

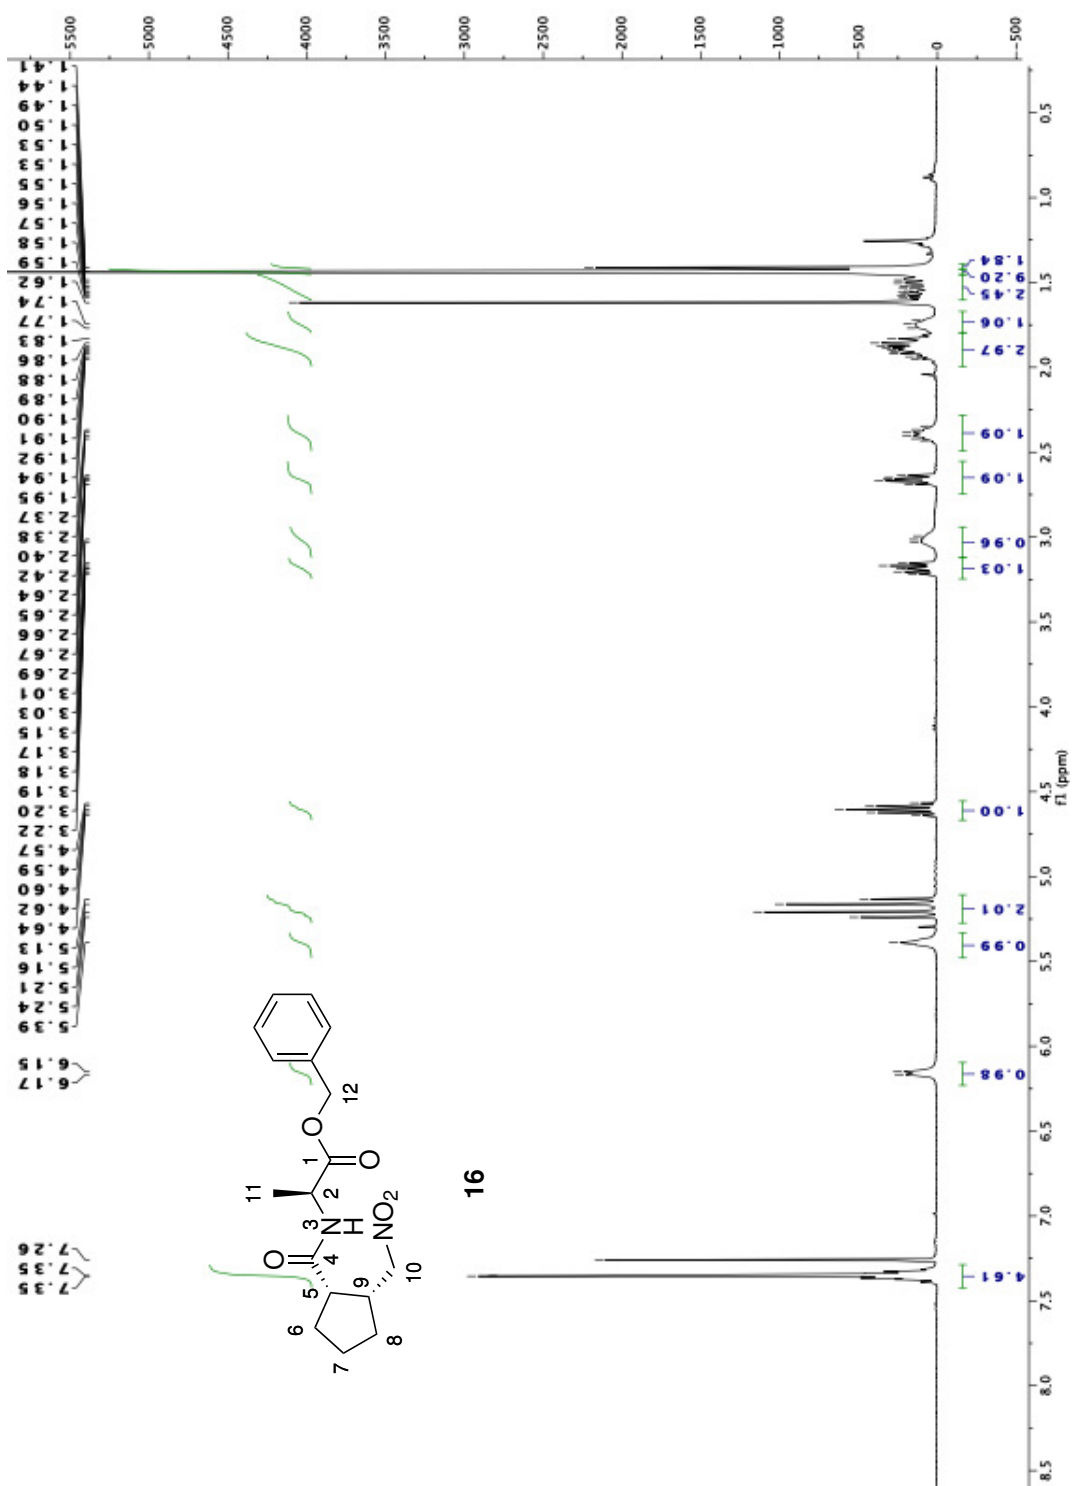

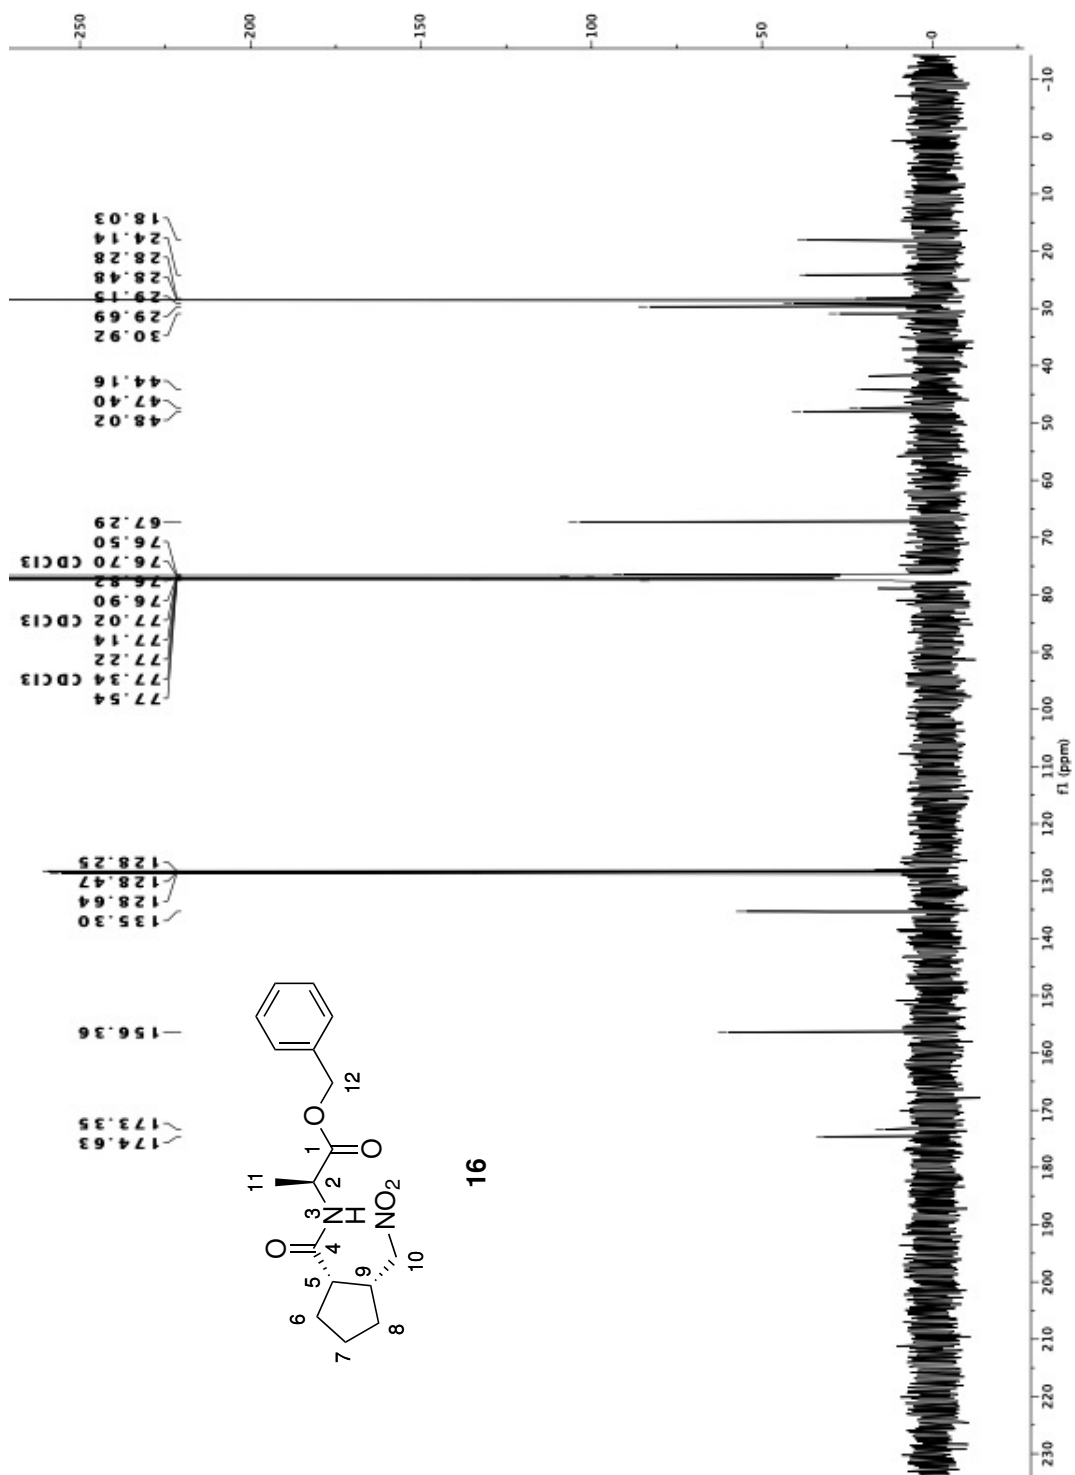

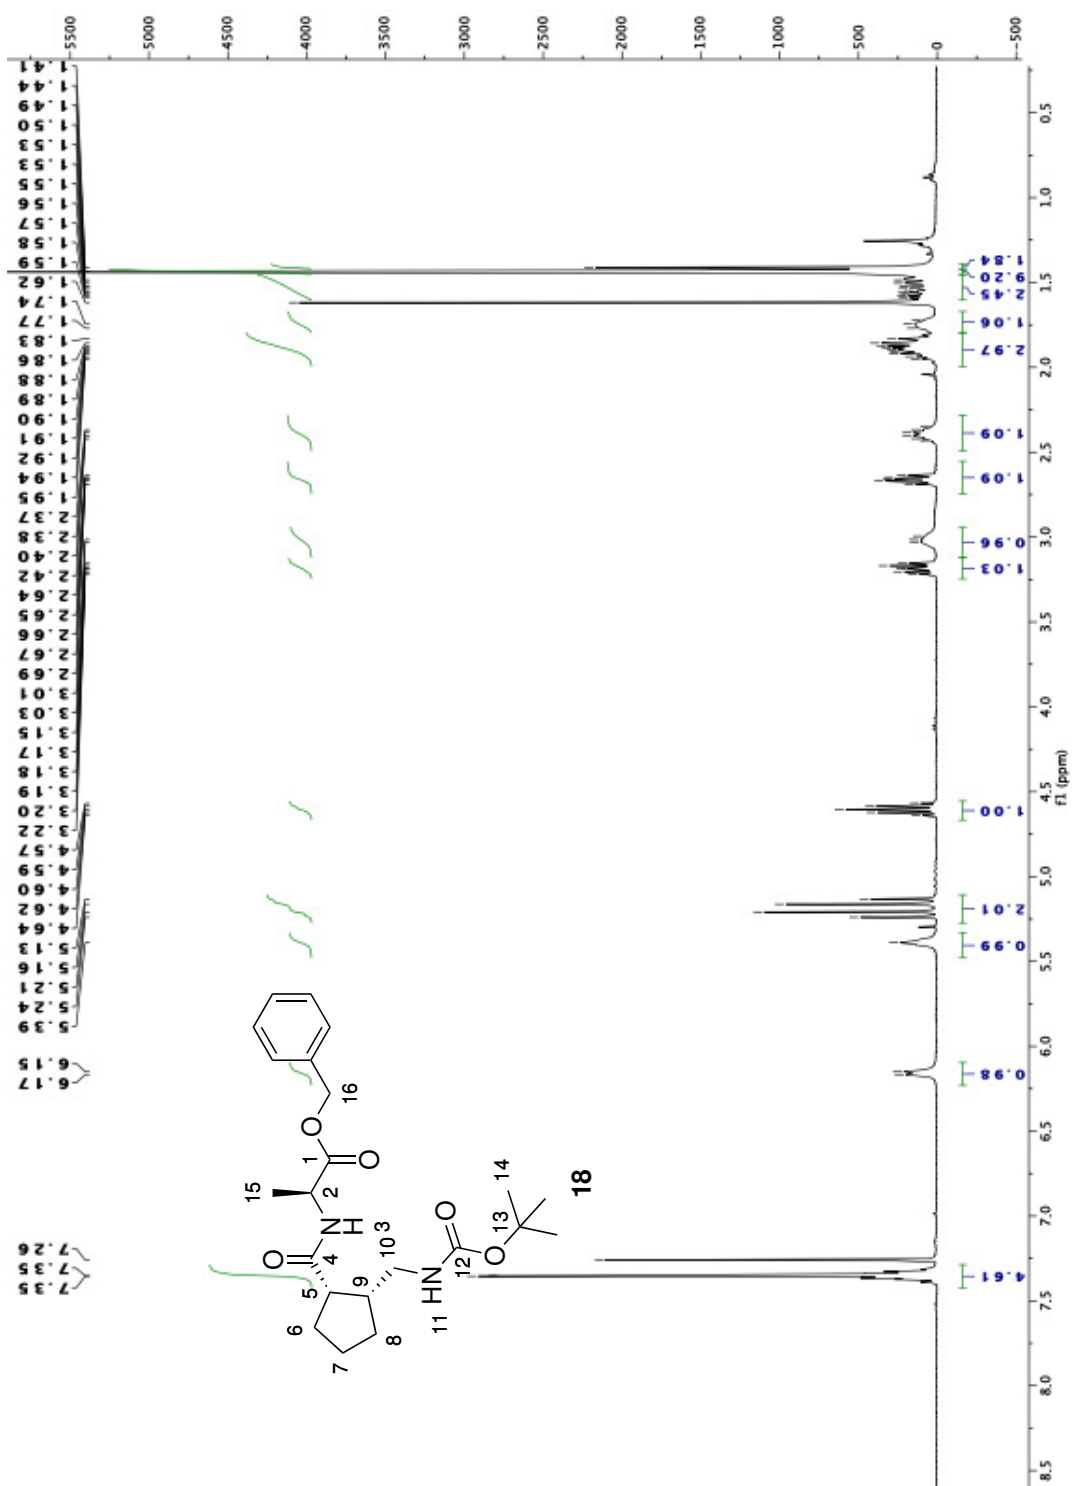

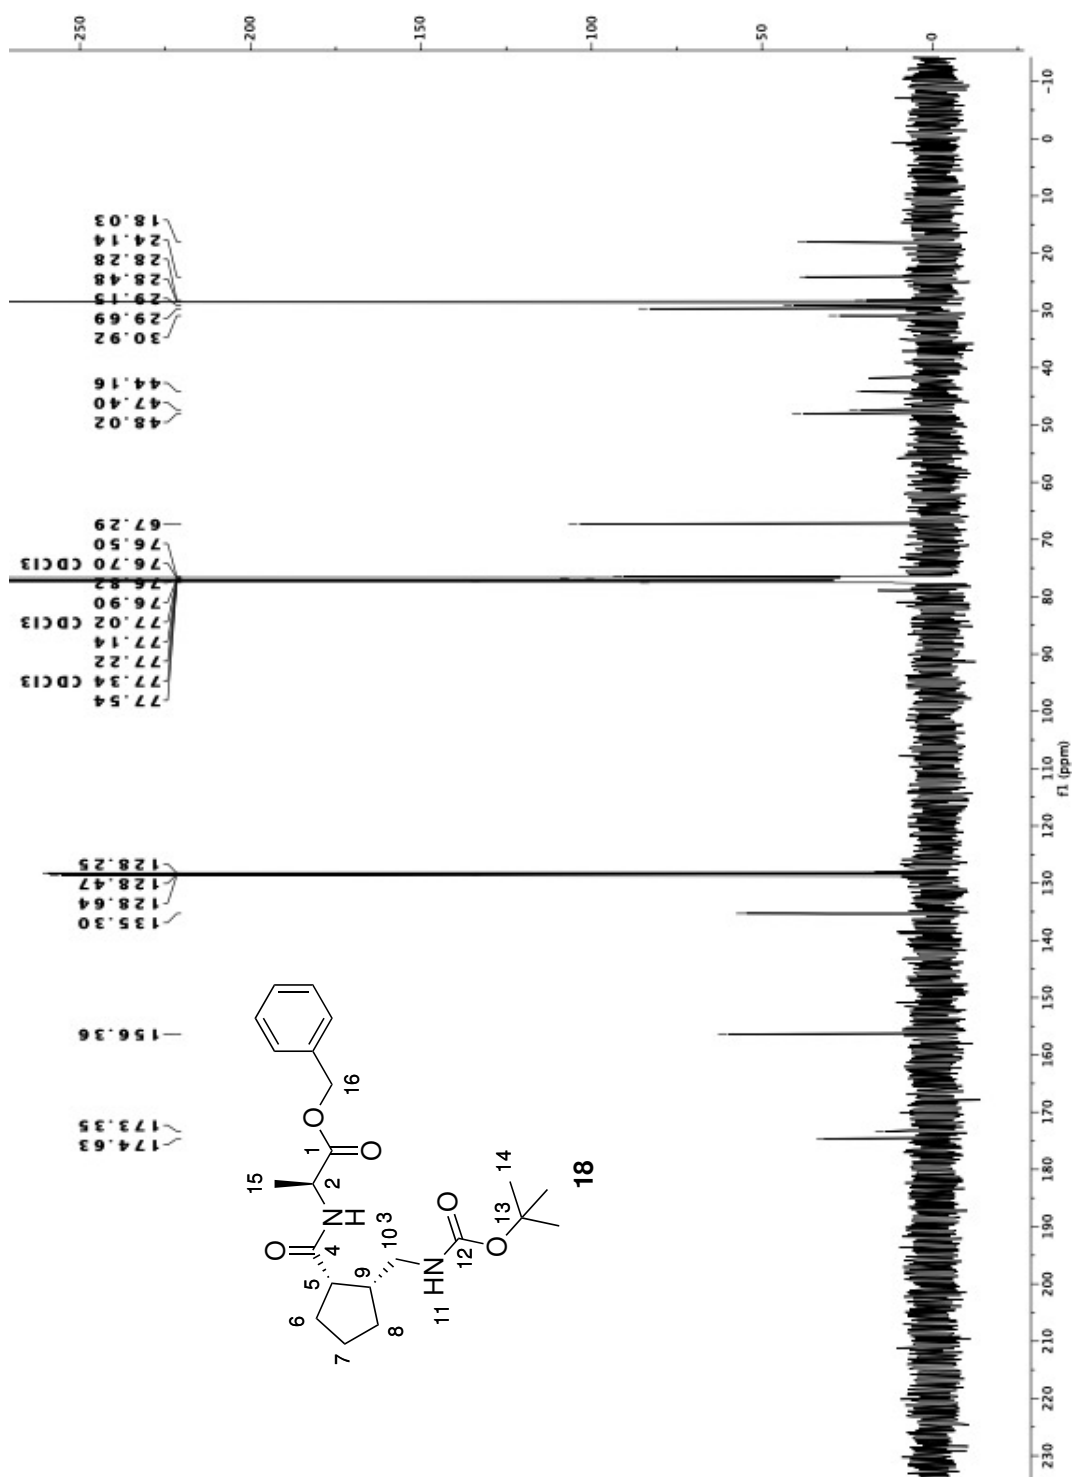



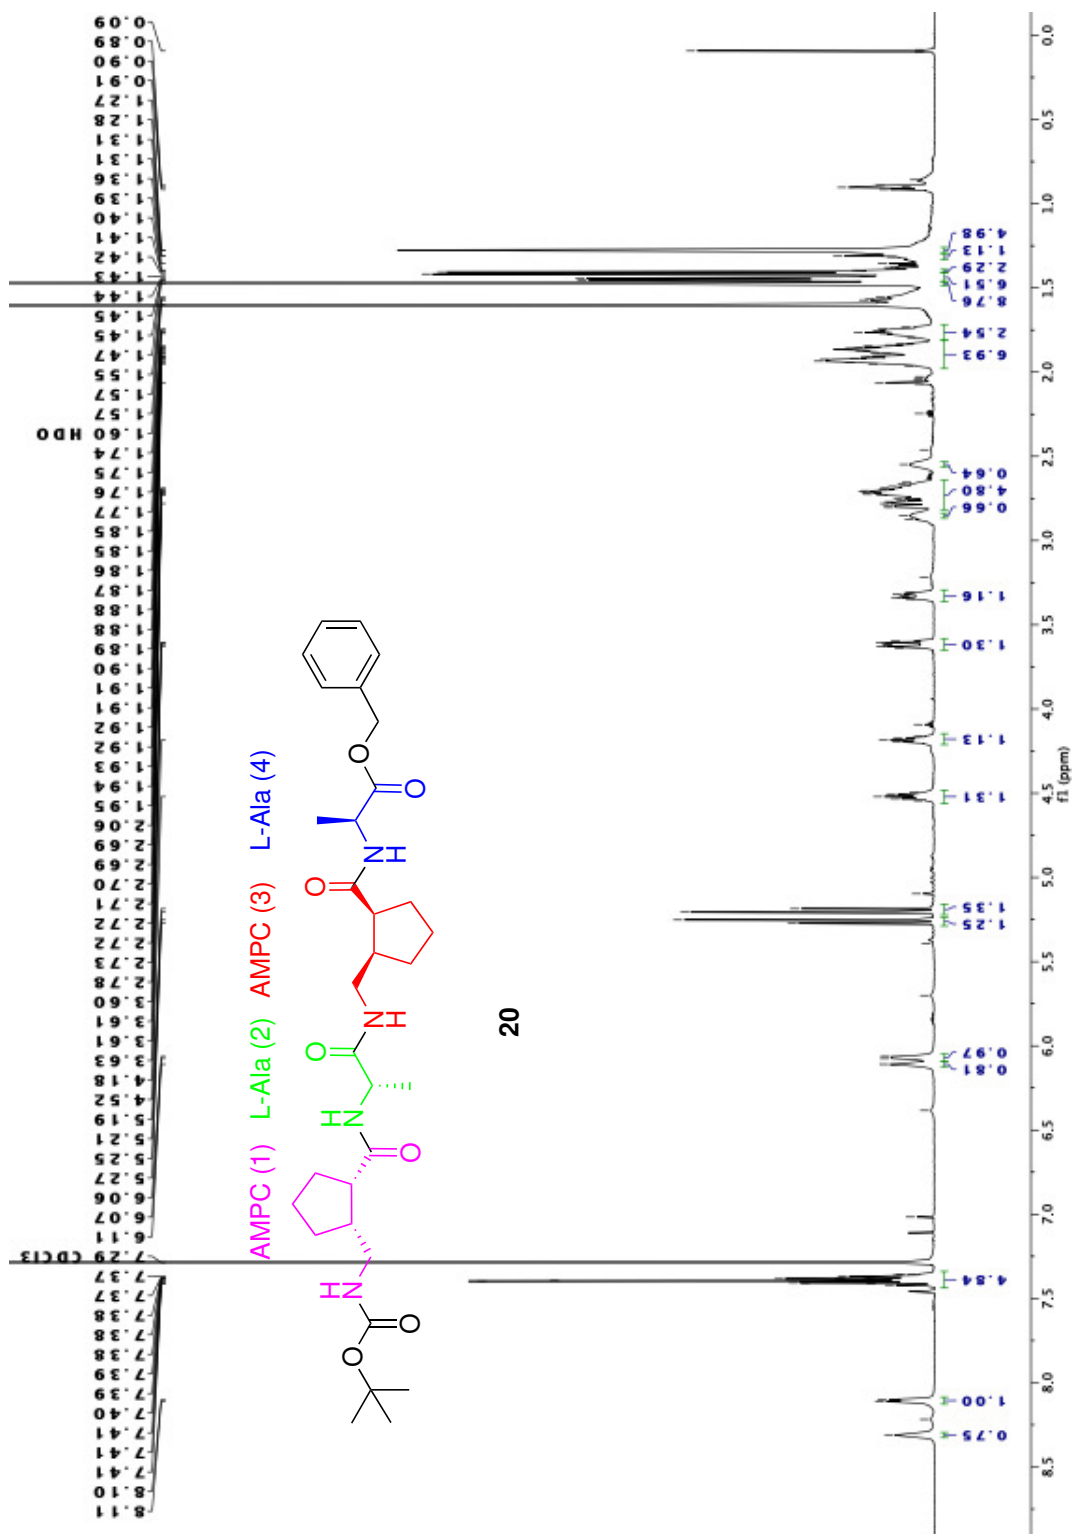

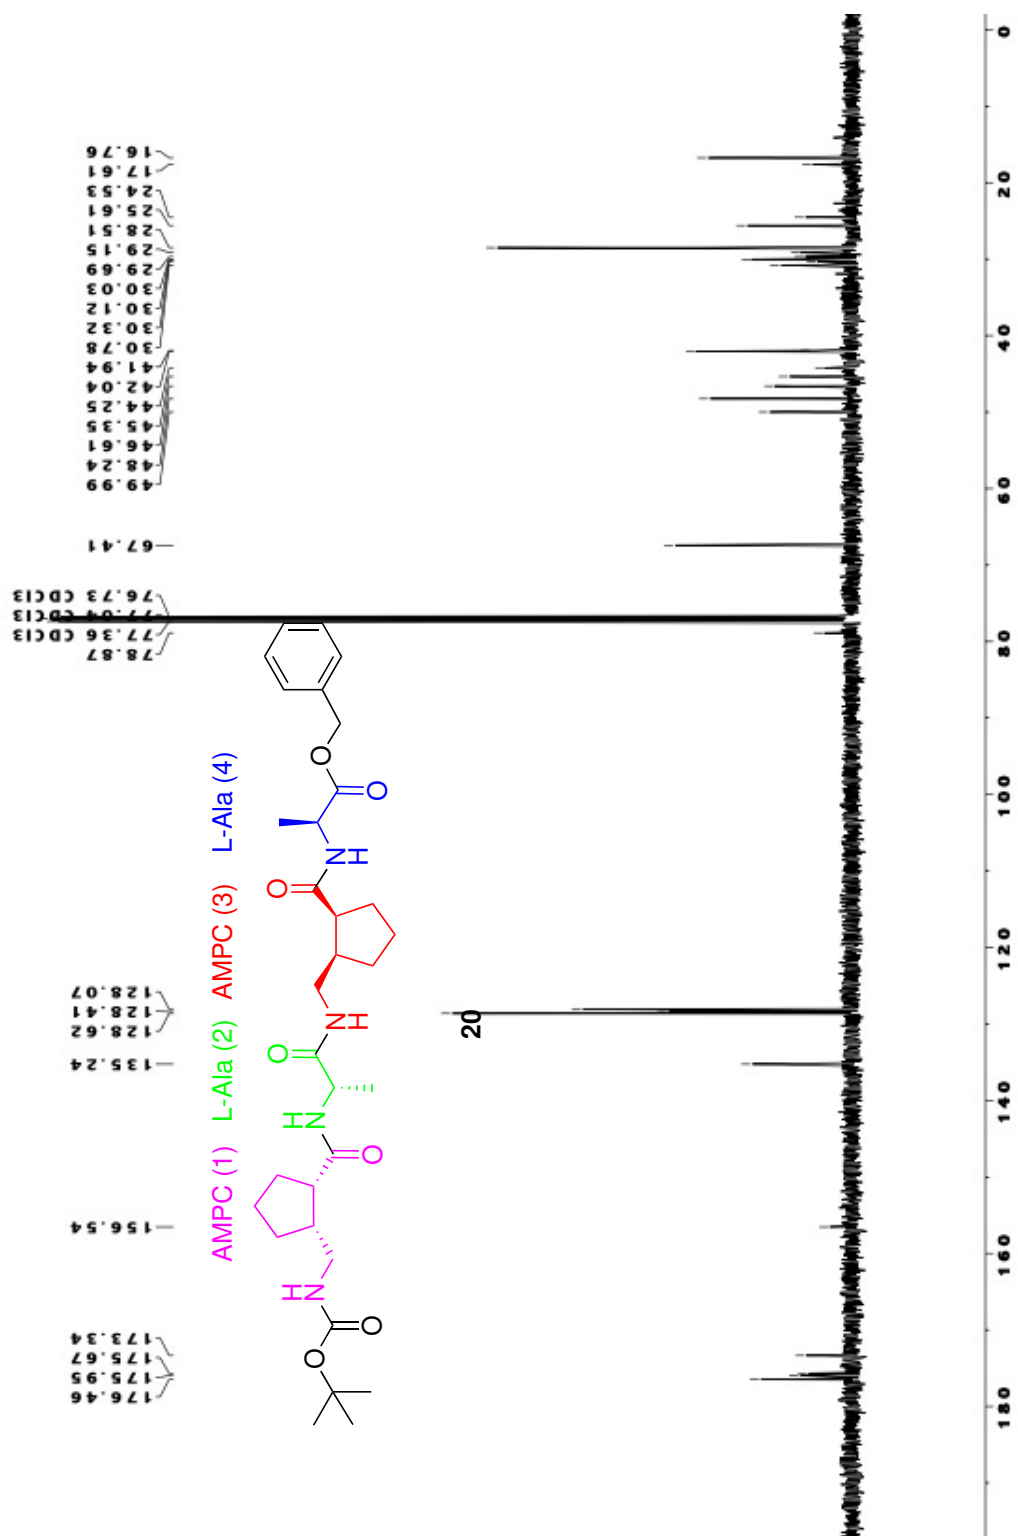

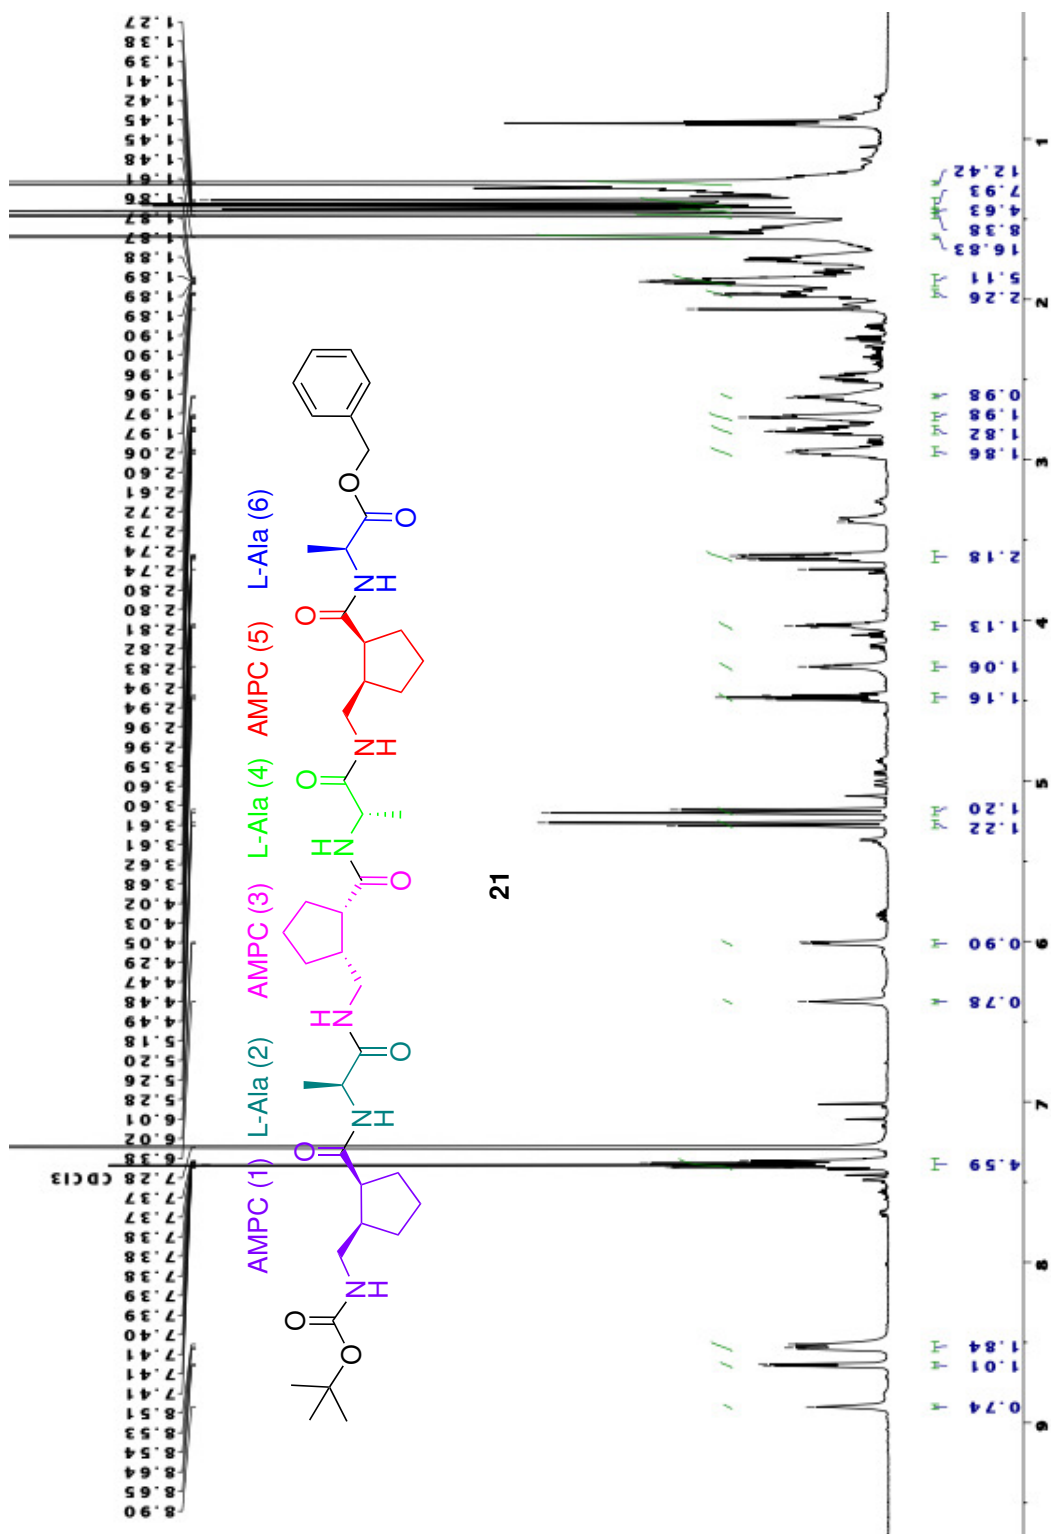

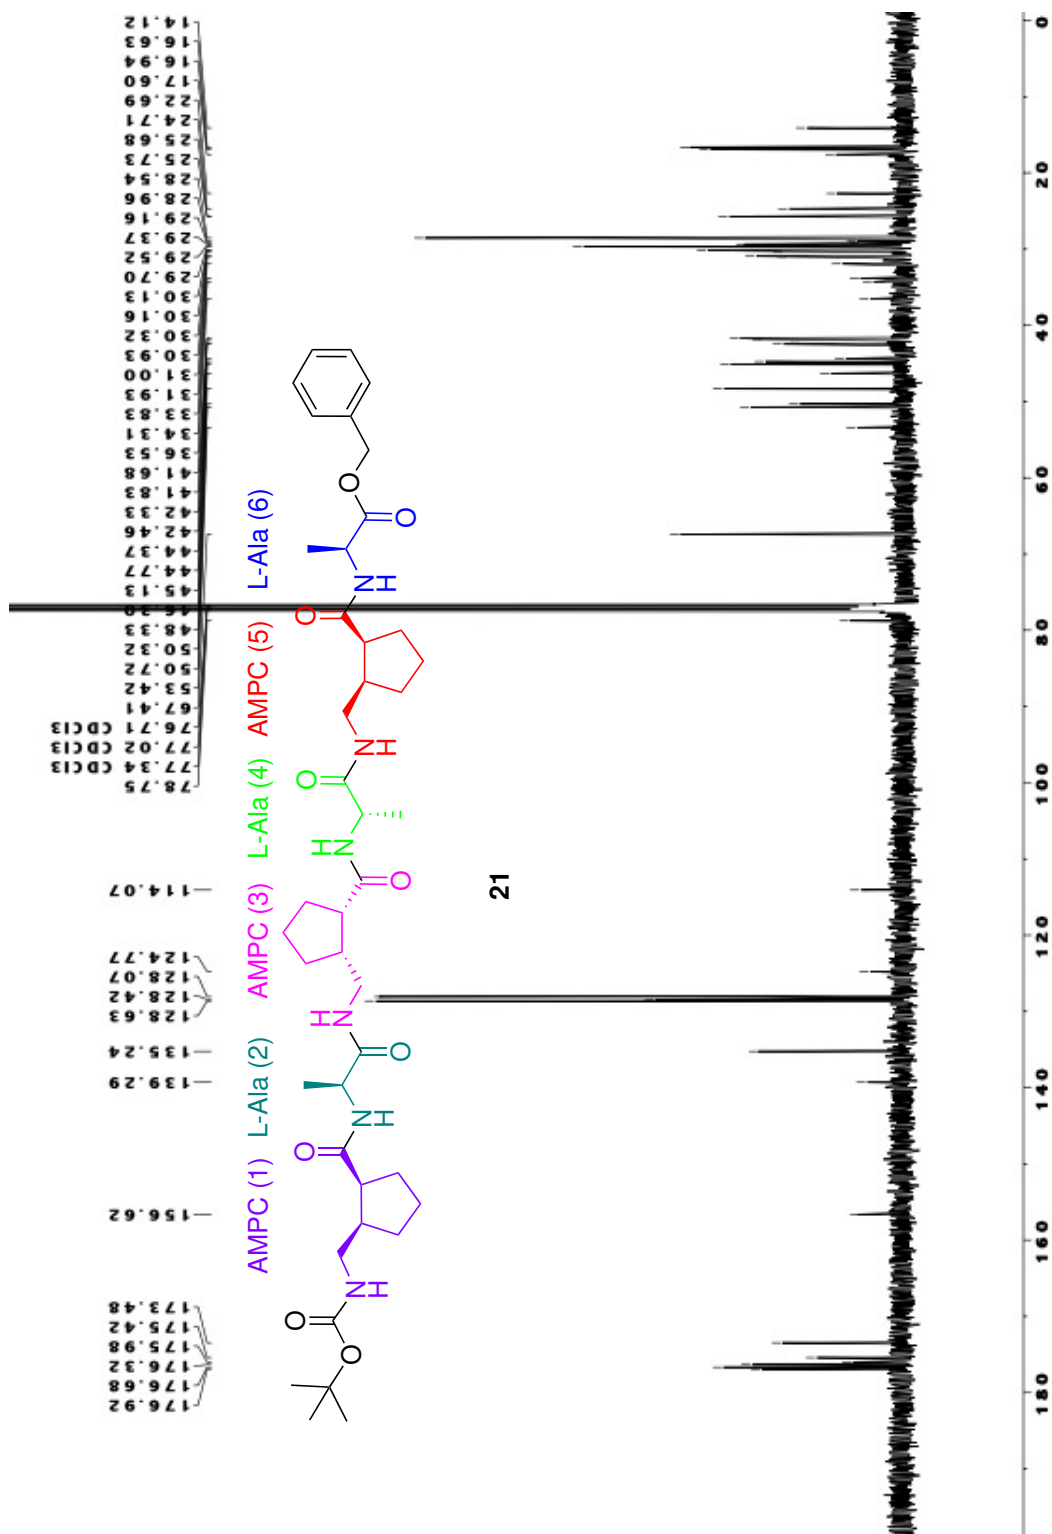

## References

- (1) He, T.; Qian, J.-Y.; Song, H.-L.; Wu, X.-Y. Enantioselective Organocatalytic Conjugate Addition of Aromatic Ketones to Nitrodienes. *Synlett* **2009**, *19*, 3195–3197.
- (2) Cao, C.-L.; Ye, M.-C.; Sun, X.-L.; Tang, Y. Pyrrolidine-thiourea as a Bifunctional Organocatalyst: Highly Enantioselective Michael Addition of Cyclohexanone to Nitroolefins Supporting Information Contents. *Organic Letters* **2006**, *8*, 2901–2904.
- (3) Liang, H.; Sun, W.; Yang, D.; Li, G.; Wang, R. Additive Effects on Asymmetric Catalysis. *Chemical Reviews* **2016**, *116*, 4006–4123.
- (4) Sovish, R. C.; Boettcher, W. Polymerization of 2-nitroolefins. *Journal of Polymer Science Part A: General Papers* **1964**, *2*, 5247–5255.
- (5) Wiley, R. H.; Smith, N. R. Polymerization of *trans*-Nitrostyrene\*. **1947**, *2141*, 444–447.
- (6) Lees, J.; Smith, B.; Wien, F.; Miles, A.; Wallace, B. CDtool—an integrated software package for circular dichroism spectroscopic data processing, analysis, and archiving. *Analytical Biochemistry* **2004**, *332*, 285–289.
- (7) Claus, R. E.; Schreiber, S. L. A Publication of Reliable Methods for the Preparation of Organic Compounds Working with Hazardous Chemicals. *Organic Syntheses* **1986**, *64*, 150.
- (8) Denmark, S. E.; Gomez, L. Tandem Double Intramolecular [4+2]/[3+2] Cycloadditions of Nitroalkenes. The Fused/Bridged Mode. *The Journal of Organic Chemistry* **2003**, *68*, 8015–8024.
- (9) Marsault, E.; Hoveyda, H. R.; Peterson, M. L.; Saint-Louis, C.; Landry, A.; Vézina, M.; Ouellet, L.; Wang, Z.; Ramaseshan, M.; Beaubien, S.; Benakli, K.; Beauchemin, S.; Déziel, R.; Peeters, T.; Fraser, G. L. Discovery of a New Class of Macrocyclic An-

- tagonists to the Human Motilin Receptor. *Journal of Medicinal Chemistry* **2006**, *49*, 7190–7197.
- (10) Greenfield, N. J. Using circular dichroism spectra to estimate protein secondary structure. *Nature protocols* **2006**, *1*, 2876–2890.
- (11) Giuliano, M. W.; Maynard, S. J.; Almeida, A. M.; Reidenbach, A. G.; Guo, L.; Ulrich, E. C.; Guzei, I. a.; Gellman, S. H. Evaluation of a cyclopentane-based gamma-amino acid for the ability to promote alpha/gamma-peptide secondary structure. *Journal of Organic Chemistry* **2013**, *78*, 12351–12361.
- (12) Wuthrich, K.; Wider, G.; Wagner, G.; Braun, W. *Sequential Resonance Assignments as a Basis for Determination of Spatial Protein Structures by High Resolution Proton Nuclear Magnetic Resonance*; 1982; Vol. 155; pp 311–319.
- (13) Chang, G.; Guida, W. C.; Still, W. C. An internal-coordinate Monte Carlo method for searching conformational space. *Journal of the American Chemical Society* **1989**, *111*, 4379–4386.
- (14) Kolossváry, I.; Guida, W. C. Low Mode Search. An Efficient, Automated Computational Method for Conformational Analysis: Application to Cyclic and Acyclic Alkanes and Cyclic Peptides. *Journal of the American Chemical Society* **1996**, *118*, 5011–5019.
- (15) Kolossváry, I.; Guida, W. C. Low-mode conformational search elucidated: Application to C39H80 and flexible docking of 9-deazaguanine inhibitors into PNP. *Journal of Computational Chemistry* **1999**, *20*, 1671–1684.
- (16) Schrödinger Release 2017-1: MacroModel,. Schrödinger, LLC, New York, NY, 2019.
- (17) Jorgensen, W. L.; Tirado-Rives, J. The OPLS [optimized potentials for liquid simulations] potential functions for proteins, energy minimizations for crystals of cyclic

- peptides and crambin. *Journal of the American Chemical Society* **1988**, *110*, 1657–1666.
- (18) Jorgensen, W. L.; Maxwell, D. S.; Tirado-Rives, J. Development and Testing of the OPLS All-Atom Force Field on Conformational Energetics and Properties of Organic Liquids. *Journal of the American Chemical Society* **1996**, *118*, 11225–11236.
- (19) Shivakumar, D.; Williams, J.; Wu, Y.; Damm, W.; Shelley, J.; Sherman, W. Prediction of Absolute Solvation Free Energies using Molecular Dynamics Free Energy Perturbation and the OPLS Force Field. *Journal of Chemical Theory and Computation* **2010**, *6*, 1509–1519.
- (20) Frisch, M. J.; Trucks, G. W.; Schlegel, H. B.; Scuseria, G. E.; Robb, M. A.; Cheeseman, J. R.; Scalmani, G.; Barone, V.; Mennucci, B.; Petersson, G. A.; Nakatsuji, H.; Caricato, M.; Li, X.; Hratchian, H. P.; Izmaylov, A. F.; Bloino, J.; Zheng, G.; Sonnenberg, J. L.; Hada, M.; Ehara, M.; Toyota, K.; Fukuda, R.; Hasegawa, J.; Ishida, M.; Nakajima, T.; Honda, Y.; Kitao, O.; Nakai, H.; Vreven, T.; Montgomery, J. A., Jr.; Peralta, J. E.; Ogliaro, F.; Bearpark, M.; Heyd, J. J.; Brothers, E.; Kudin, K. N.; Staroverov, V. N.; Kobayashi, R.; Normand, J.; Raghavachari, K.; Rendell, A.; Burant, J. C.; Iyengar, S. S.; Tomasi, J.; Cossi, M.; Rega, N.; Millam, J. M.; Klene, M.; Knox, J. E.; Cross, J. B.; Bakken, V.; Adamo, C.; Jaramillo, J.; Gomperts, R.; Stratmann, R. E.; Yazyev, O.; Austin, A. J.; Cammi, R.; Pomelli, C.; Ochterski, J. W.; Martin, R. L.; Morokuma, K.; Zakrzewski, V. G.; Voth, G. A.; Salvador, P.; Dannenberg, J. J.; Dapprich, S.; Daniels, A. D.; Farkas, O.; Foresman, J. B.; Ortiz, J. V.; Cioslowski, J.; Fox, D. J. Gaussian09 Revision E.01. Gaussian Inc. Wallingford CT 2009.
- (21) Chai, J.-D.; Head-Gordon, M. Long-range corrected hybrid density functionals with damped atom–atom dispersion corrections. *Physical Chemistry Chemical Physics* **2008**, *10*, 6615.

- (22) Ditchfield, R.; Hehre, W. J.; Pople, J. A. Self-Consistent Molecular-Orbital Methods. IX. An Extended Gaussian-Type Basis for Molecular-Orbital Studies of Organic Molecules. *The Journal of Chemical Physics* **1971**, *54*, 724–728.
- (23) Hehre, W. J.; Ditchfield, R.; Pople, J. A. Self—Consistent Molecular Orbital Methods. XII. Further Extensions of Gaussian—Type Basis Sets for Use in Molecular Orbital Studies of Organic Molecules. *The Journal of Chemical Physics* **1972**, *56*, 2257–2261.
- (24) Hariharan, P. C.; Pople, J. A. The influence of polarization functions on molecular orbital hydrogenation energies. *Theoretica Chimica Acta* **1973**, *28*, 213–222.
- (25) Grimme, S. Supramolecular Binding Thermodynamics by Dispersion-Corrected Density Functional Theory. *Chemistry - A European Journal* **2012**, *18*, 9955–9964.
- (26) Paton Lab.; Rodríguez-Guerra, J.; Chen, J.; IFunes, bobbypaton/GoodVibes: GoodVibes v3.0.0. 2019; <https://zenodo.org/record/3346166>.
- (27) Marenich, A. V.; Cramer, C. J.; Truhlar, D. G. Universal Solvation Model Based on Solute Electron Density and on a Continuum Model of the Solvent Defined by the Bulk Dielectric Constant and Atomic Surface Tensions. *The Journal of Physical Chemistry B* **2009**, *113*, 6378–6396.
- (28) Ribeiro, R. F.; Marenich, A. V.; Cramer, C. J.; Truhlar, D. G. Use of Solution-Phase Vibrational Frequencies in Continuum Models for the Free Energy of Solvation. *The Journal of Physical Chemistry B* **2011**, *115*, 14556–14562.
